# Supplementary material for: Potential Role of Immune-Related lncRNAs in Prognosis of Hepatocellular Carcinoma: An Integrative Study
Source: Research Square preprint supplement (doi:10.21203/rs.3.rs-7035692/v1), 2025-07-18
Supplement: Supplementary file 1 [file 4437f48c85889fc1337ca9e2.docx]

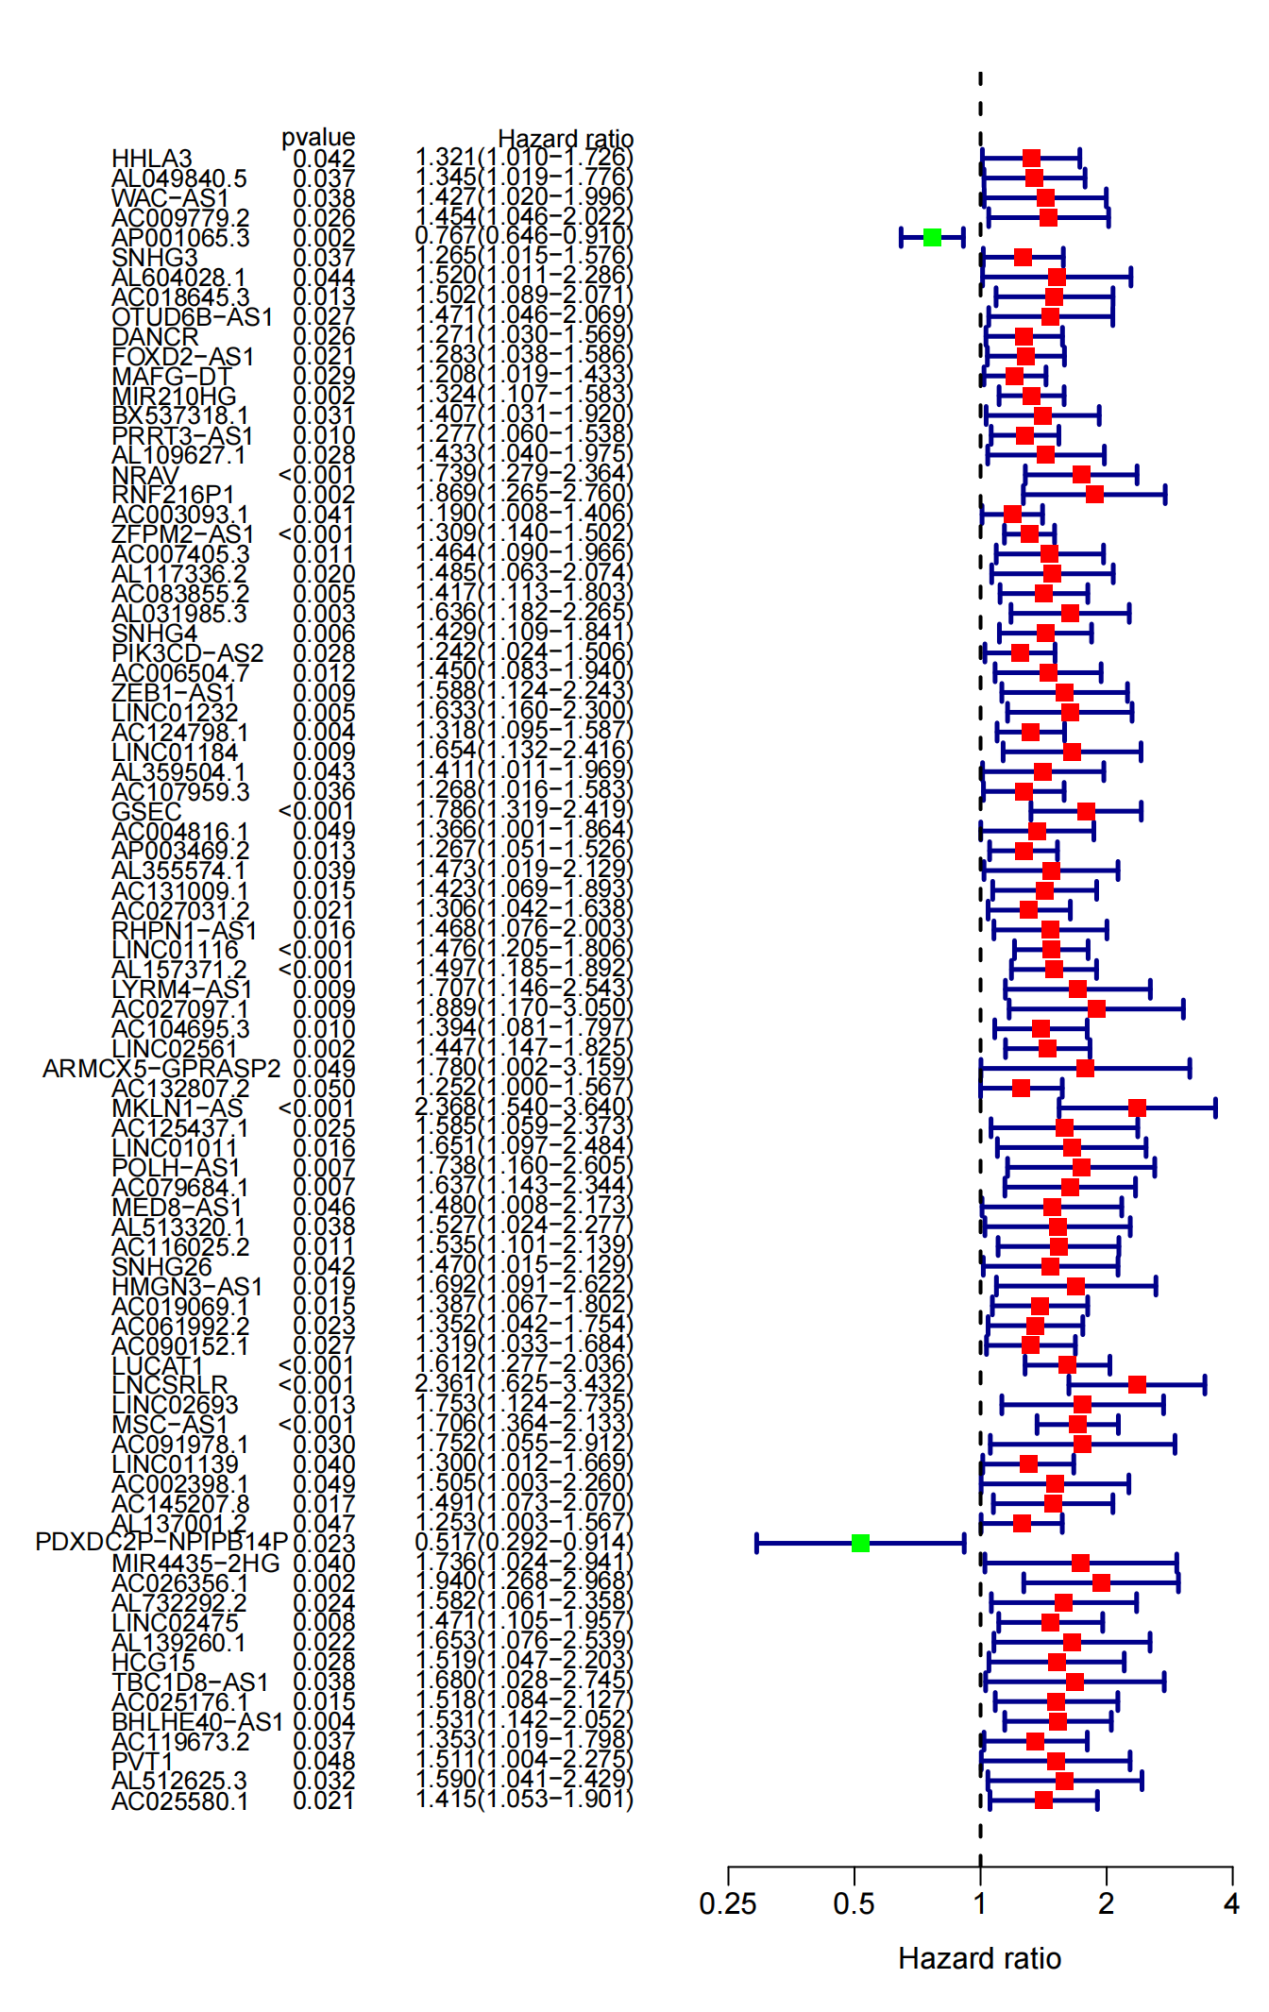


Fig.S1 84 lncRNAs associated with 71 immune related mRNAs and correlated with survival.


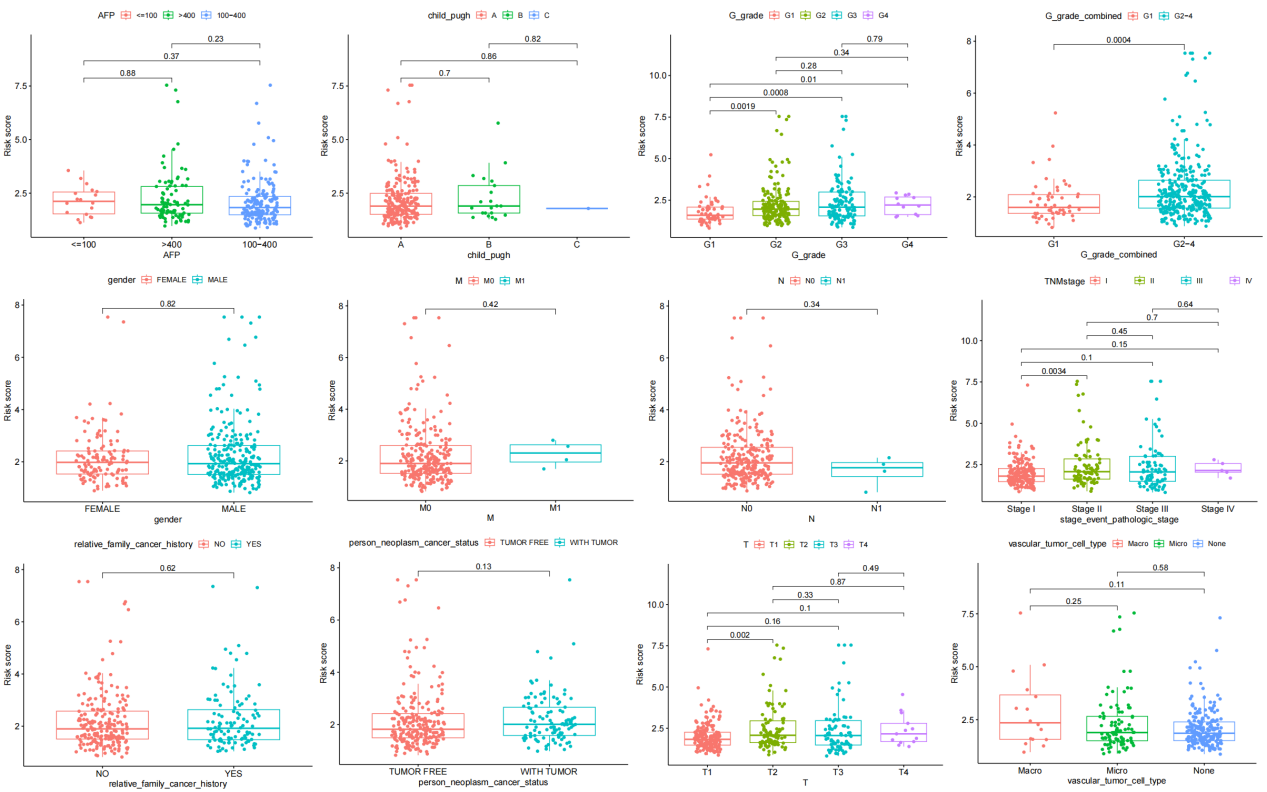


Fig.S2 Boxplots depicting the relationship between 11 clinical phenotypes and riskscore.

| AZGP1,B2M,CALR,CANX,CD1A,CD1B,CD1C,CD1D,CD1E,CD4,CD8A,CD8B,CD74,CREB1,CTSB,CTSE,CTSL,CTSS,FCER1G,FCGRT,PDIA3,HFE,HLA-A,HLA-B,HLA-C,HLA-DMA,HLA-DMB,HLA-DOA,HLA-DOB,HLA-DPA1,HLA-DPB1,HLA-DQA1,HLA-DQA2,HLA-DQB1,HLA-DRA,HLA-DRB1,HLA-DRB3,HLA-DRB4,HLA-DRB5,HLA-E,HLA-F,HLA-G,HLA-H,MR1,HSPA1A,HSPA1B,HSPA1L,HSPA2,HSPA4,HSPA5,HSPA6,HSPA8,HSP90AA1,HSP90AB1,ICAM1,IFNA1,IFNA2,IFNA4,IFNA5,IFNA6,IFNA7,IFNA8,IFNA10,IFNA13,IFNA14,IFNA16,IFNA17,IFNA21,IFNG,KIR2DL1,KIR2DL2,KIR2DL3,KIR2DL4,KIR2DS1,KIR2DS3,KIR2DS4,KIR2DS5,KIR3DL1,KIR3DL2,KLRC1,KLRC2,KLRC3,KLRD1,LTA,CIITA,MICA,MICB,NFYA,NFYB,NFYC,LGMN,PSMB8,PSMC1,PSMC2,PSMC3,PSMC4,PSMC5,PSMC6,PSMD1,PSMD2,PSMD3,PSMD4,PSMD5,PSMD7,PSMD8,PSMD10,PSMD11,PSMD13,PSME1,PSME1,PSME2,PSME2,RELB,RFX5,RFXAP,SLC10A2,TAP1,TAP2,TAPBP,THBS1,SEM1,KLRC4,AP3B1,RFXANK,PSMD6,PSME3,PSMD14,CLEC4M,IFI30,PROCR,ADRM1,ECPAS,TRPC4AP,CD209,UBXN1,ERAP1,TAPBPL,KIR2DL5A,ERAP2,ULBP3,ULBP2,ULBP1,KIR3DL3,RAET1E,RAET1L,UBR1,RAET1G,PDIA2,HAMP,PI3,CAMP,DEFB4A,PPBP,REG3G,CXCL14,CXCL16,SLPI,CXCL8,CXCL10,CXCL9,CXCL5,CXCL11,CXCL6,CXCL1,CXCL12,CXCL13,CXCL2,PF4,XCL1,CXCL3,DEFB103B,CCL13,CCL1,DEFB1,CCL8,ELANE,DEFB103A,DEFA3,DEFA1,TMSB10,DEFA6,DEFA5,DEFA4,LCN2,LCN1,COLEC10,BPI,S100A9,S100A8,DCD,LCN6,S100A12,HTN3,LCN8,DEFA1B,CCR10,CELA1,DEFB106A,PENK,BPIFC,MMP12,BPIFB6,LEAP2,SFTPD,LCN9,BPIFB2,PTGDS,TMSB4X,PGLYRP1,ZC3HAV1,TMSB15A,S100B,S100A13,S100A6,DEFB119,DEFB107A,DEFB105A,SERPIND1,DEFB129,DEFB127,S100P,S100A7,DEFB104A,DEFB126,DEFB106B,DEFB104B,DEFB107B,PGLYRP3,PGLYRP2,S100A10,S100A2,DEFB125,DEFB123,DEFB105B,DEFB132,BPIFB3,LCN12,PGLYRP4,S100A11,S100A5,S100A3,S100A1,DEFB128,DEFB108B,HTN1,LMBR1L,S100A7A,DEFB118,COLEC12,TMSB4Y,DEFB131A,DEFB134,DEFB130A,DEFB124,DEFB121,DEFB116,DEFB115,DEFB114,DEFB113,DEFB112,DEFB110,TMSB15B,DEFB133,S100Z,MAVS,TMSB4XP8,S100A14,LCN10,S100A16,DEFB136,DEFB135,DEFB117,DEFB110,ZC3HAV1L,S100A7L2,MBL3P,DEFB4B,BPIFB4,IFNAR1,AZU1,DEFB131B,DEFA1A3,LCN1P1,S100G,DEFA7P,DEFB130B,DEFB108F,DEFB131C,TCHHL1,TINAGL1,IFNGR1,SLC22A17,WFIKKN1,WFDC2,IL6,UMODL1,TGFB1,PF4V1,MMP9,ANOS1,TLR4,IFNG,SPAG11B,A2M,CTSL,NFKB1,APOBEC3G,FABP6,NOD2,MBL2,SFTPA1,RBP1,TLR2,SLC40A1,PLAU,IL1B,PAEP,HJV,MUC5AC,CTSS,OBP2A,PLTP,MX1,DDX58,IFNL1,IRF3,SFTPA2,LPA,LBP,RBP4,SFTPA1,NOX4,LTF,IFNB1,RBP5,FABP7,FABP5,FABP3,FABP2,FABP4,R3HDML,BPIFA3,BPIFB1,OASL,CRABP2,CRABP1,RBP7,DUOX1,OBP2B,RBP2,LCN15,CETP,FABP12,FABP9,BPIFA1,LCNL1,C8G,SPAG11A,PI15,NOX1,PMP2,APOD,ORM2,ORM1,TNF,CTSG,PRTN3,MAPK1,PML,AEN,CYBB,BPIFA2,ISG20,BCL3,ISG20L2,NOX5,NOX3,DUOX2,TLR3,TFRC,IFIH1,LRP1,TRIM5,IDO1,GDF15,NEDD4,ADIPOQ,STAT3,STAT1,IFNL2,SOCS3,SEMG1,TNFSF10,CCL20,SOCS1,RNASEL,IRF1,IL15,APOBEC3F,PLAAT4,CHIT1,IFNA1,CD40,TLR7,PPIA,HFE,ZYX,NLRX1,PGC,VEGFA,IKBKE,ISG15,DHX58,TNFAIP3,TFR2,FCN2,MUC4,F2R,ELN,IL27,MAPT,LYZ,CCL5,LEP,CYLD,KLKB1,CST4,CSRP1,MAPK14,JUN,ITGAV,IRF5,CCR6,IL12B,TLR8,GNLY,CD81,EIF2AK2,APOM,CACYBP,NOD1,MAPK8,MAPK3,BST2,BPHL,PLA2G2A,GRN,NEWENTRY,PDGFRA,GNAI1,WNT5A,FURIN,ADAR,TYK2,NOS2,TRAF3,TPT1,TPM2,NEO1,AHNAK,TLR1,TK2,PRDX2,MX2,FGF2,FGA,TCF7L2,F2RL1,TKFC,MSR1,NFKBIZ,LMBR1,EPPIN,SRC,MPO,ELAVL1,ROBO3,SP1,SOD1,PDF,DLL4,ECD,SLC11A1,DMBT1,STING1,SKIV2L,SEMG2,LTA,DES,DCK,DAXX,TNFRSF10A,TNFRSF10B,EED,CCL4,LIMS1,LALBA,APOBEC3H,TMPRSS6,SPINK5,MARCO,BECN1,TNFSF11,KNG1,CSK,KLRK1,KCNH2,JUND,JAK1,CREB1,CLDN4,CCL28,RNASE3,RN7SL1,IRF7,IREB2,ILK,IL18,IL17A,LTB4R,APOBEC3A,MASP2,TRIM27,RELA,IL7R,IL1A,PTX3,IFNAR2,IFN1@,SYTL1,APOBEC3C,DDX17,PTGS2,HTR1A,SEPTIN7,CD40LG,CD14,CD8A,CD4,MASP1,PROC,MAP2K2,MAP2K1,HRG,NDRG1,IRF9,TRIM22,LANCL1,PPP4C,HMOX1,HMGB1,HLA-B,RNASE7,ABCC4,HGF,HDAC1,IFNLR1,PLSCR1,B2M,BACH2,TANK,PIK3CG,ARRB1,RSAD2,STAB2,TBK1,PDYN,PDGFRB,PDCD1,PCSK2,PCSK1,ARG2,AQP9,FASLG,APOH,BIRC5,ANXA6,IL22,VTN,VIM,VCAM1,PRDX1,GFAP,GBP2,ALB,SLC29A3,OAS1,AGER,UNC93B1,TNFSF4,NOS1,ACTG1,ACTA1,ACO1,SERPINA3,CXCR1,CCL15,CCL14,CCL4,CCL16,CCL19,CCL13,CCL18,CCL17,CCL26,CCL22,CCR3,CCL28,CCL4L1,ACKR2,CCR7,CCL27,CCR8,ACKR4,CCR10,CCL2,CCL21,CCL7,CCL5,CCL3,CCL20,CCL11,CCR5,CCL23,CCL25,CCL1,CCL3L3,CCL4L2,CXCL12,XCL1,CCL8,CCL3L1,CCR1,CCL24,XCL2,CXCL1,CXCL10,CXCR4,CXCL2,CXCR6,CCR4,CXCL11,TAFA5,TAFA3,TAFA4,TAFA1,TAFA2,CCL15-CCL14,IL6,TNF,IL1B,IL18,PTK2B,VEGFA,IL4,CDH1,CD40,DEFB103B,F2RL1,MMP9,LTBP1,DEFB4A,TNFSF10,IL13,IL10,IL2,PPARG,FGR,MIF,CRP,JAK2,IL1A,PTK2,PTGDR,CD86,HCK,ARRB1,GNAI1,VDR,OLR1,GRK2,TXK,RNASE2,CD79A,CD79B,LYN,SYK,BTK,BLNK,VAV3,VAV1,VAV2,RAC1,RAC2,RAC3,PPP3CA,PPP3CB,PPP3CC,CHP1,PPP3R1,PPP3R2,CHP2,NFAT5,NFATC1,NFATC2,NFATC3,NFATC4,HRAS,KRAS,NRAS,FOS,JUN,CARD11,BCL10,MALT1,CHUK,IKBKB,IKBKG,NFKB1,RELA,NFKBIA,NFKBIB,NFKBIE,CD81,CD19,CR2,PIK3R5,PIK3R1,PIK3R2,PIK3R3,PIK3CA,PIK3CB,PIK3CD,PIK3CG,AKT3,AKT1,AKT2,GSK3B,INPP5D,CD22,CD72,PTPN6,LILRB3,FCGR2B,RASGRP3,PLCG2,PRKCB,IFITM1,IGH,IGHA1,IGHA2,IGHD,IGHD1-1,IGHD1-14,IGHD1-20,IGHD1-26,IGHD1-7,IGHD2-15,IGHD2-2,IGHD2-21,IGHD2-8,IGHD3-10,IGHD3-16,IGHD3-22,IGHD3-3,IGHD3-9,IGHD4-11,IGHD4-17,IGHD4-23,IGHD4-4,IGHD5-12,IGHD5-18,IGHD5-24,IGHD5-5,IGHD6-13,IGHD6-19,IGHD6-25,IGHD6-6,IGHD7-27,IGHE,IGHG1,IGHG2,IGHG3,IGHG4,IGHJ1,IGHJ2,IGHJ3,IGHJ4,IGHJ5,IGHJ6,IGHM,IGH,IGHV1-18,IGHV1-2,IGHV1-24,IGHV1-3,IGHV1-45,IGHV1-46,IGHV1-58,IGHV1-69,IGHV1-8,IGHV1-38-4,IGHV1-69-2,IGHV2-26,IGHV2-5,IGHV2-70,IGHV3-11,IGHV3-13,IGHV3-15,IGHV3-16,IGHV3-20,IGHV3-21,IGHV3-23,IGHV3-30,IGHV3-30-3,IGHV3-30-5,IGHV3-33,IGHV3-35,IGHV3-38,IGHV3-43,IGHV3-48,IGHV3-49,IGHV3-53,IGHV3-64,IGHV3-66,IGHV3-7,IGHV3-72,IGHV3-73,IGHV3-74,IGHV3-9,IGHV3-38-3,IGHV3-69-1,IGHV4-28,IGHV4-30-1,IGHV4-30-2,IGHV4-30-4,IGHV4-31,IGHV4-34,IGHV4-39,IGHV4-4,IGHV4-59,IGHV4-61,IGHV4-38-2,IGHV5-51,IGHV5-10-1,IGHV6-1,IGHV7-4-1,IGHV7-81,IGK,IGKC,IGKDEL,IGKJ,IGKJ1,IGKJ2,IGKJ3,IGKJ4,IGKJ5,IGKV@,IGKV1-12,IGKV1-13,IGKV1-16,IGKV1-17,IGKV1-27,IGKV1-33,IGKV1-37,IGKV1-39,IGKV1-5,IGKV1-6,IGKV1-8,IGKV1-9,IGKV1D-12,IGKV1D-13,IGKV1D-16,IGKV1D-17,IGKV1D-33,IGKV1D-37,IGKV1D-39,IGKV1D-42,IGKV1D-43,IGKV1D-8,IGKV2-24,IGKV2-28,IGKV2-30,IGKV2-40,IGKV2D-24,IGKV2D-28,IGKV2D-29,IGKV2D-30,IGKV2D-40,IGKV3-11,IGKV3-15,IGKV3-20,IGKV3-7,IGKV3D-11,IGKV3D-15,IGKV3D-20,IGKV3D-7,IGKV4-1,IGKV5-2,IGKV6-21,IGKV6D-21,IGKV6D-41,IGL,IGLC1,IGLC2,IGLC3,IGLC6,IGLC7,IGLJ,IGLJ1,IGLJ2,IGLJ3,IGLJ4,IGLJ5,IGLJ6,IGLJ7,IGLV@,IGLV1-36,IGLV1-40,IGLV1-44,IGLV1-47,IGLV1-50,IGLV1-51,IGLV10-54,IGLV11-55,IGLV2-11,IGLV2-14,IGLV2-18,IGLV2-23,IGLV2-33,IGLV2-8,IGLV3-1,IGLV3-10,IGLV3-12,IGLV3-16,IGLV3-19,IGLV3-21,IGLV3-22,IGLV3-25,IGLV3-27,IGLV3-32,IGLV3-9,IGLV4-3,IGLV4-60,IGLV4-69,IGLV5-37,IGLV5-39,IGLV5-45,IGLV5-48,IGLV5-52,IGLV6-57,IGLV7-43,IGLV7-46,IGLV8-61,IGLV9-49,C3,C5,CAMP,CCL1,CCL11,CCL13,CCL14,CCL15-CCL14,CCL15,CCL16,CCL17,CCL18,CCL19,CCL2,CCL20,CCL21,CCL22,CCL23,CCL24,CCL25,CCL26,CCL27,CCL28,CCL3,CCL3L1,CCL3P1,CCL3L3,CCL4,CCL4L2,CCL4L1,CCL5,CCL7,CCL8,CKLF,CMA1,CTSG,CX3CL1,CXCL1,CXCL10,CXCL11,CXCL12,CXCL13,CXCL14,CXCL16,CXCL17,CXCL2,CXCL3,CXCL5,CXCL6,CXCL9,CCN1,DEFA1,DEFA3,DEFA5,DEFB1,DEFB103B,DEFB104A,DEFB4A,EDN1,EDN2,EDN3,FGF10,FGF2,HTN3,CXCL8,LECT2,PF4,PF4V1,PLAU,PPBP,PPBPP1,PROK2,RNASE2,SAA1,SAA2,SBDS,SEMA3A,SEMA3B,SEMA3C,SEMA3D,SEMA3E,SEMA3F,SEMA3G,SEMA4A,SEMA4B,SEMA4C,SEMA4D,SEMA4F,SEMA4G,SEMA5A,SEMA5B,SEMA6A,SEMA6B,SEMA6C,SEMA6D,SEMA7A,SLIT1,SLIT2,TNC,TYMP,XCL1,XCL2,C5AR1,ACKR2,CCR1,CCR10,CCR3,CCR4,CCR5,CCR6,CCR7,CCR8,CCR9,ACKR4,CCRL2,CMKLR1,CX3CR1,CXCR3,CXCR4,CXCR5,CXCR6,ACKR3,CYSLTR1,CYSLTR2,ACKR1,EDNRA,EDNRB,FPR1,FPR2,FPR2,GPR17,GPR32,GPR33,PTGDR2,C5AR2,CXCR1,CXCR2,LTB4R,LTB4R2,PLAUR,PLXNA1,PLXNA2,PLXNA3,PLXNA4,PLXNB1,PLXNB2,PLXNB3,PLXNC1,PLXND1,PTAFR,ROBO1,ROBO2,ROBO3,RXFP3,XCR1,ADIPOQ,ADM,ADM2,AGRP,AGT,AMBN,AMELX,AMH,ANGPTL5,ANGPTL7,APLN,AREG,MANF,CDNF,ARTN,AVP,AZU1,BDNF,BMP1,BMP10,BMP15,BMP2,BMP3,BMP4,BMP5,BMP6,BMP7,BMP8A,BMP8B,BTC,MYDGF,C3,C5,CALCA,CALCB,CAMP,CAT,CCK,CCL1,CCL11,CCL13,CCL14,CCL15-CCL14,CCL15,CCL16,CCL17,CCL18,CCL19,CCL2,CCL20,CCL21,CCL22,CCL23,CCL24,CCL25,CCL26,CCL27,CCL28,CCL3,CCL3L1,CCL3P1,CCL3L3,CCL4,CCL4L2,CCL4L1,CCL5,CCL7,CCL8,CD320,CD40LG,CD70,ADA2,CER1,CGA,CGB3,CGB1,CGB2,CGB5,CGB7,CGB8,CHGA,CHGB,CKLF,CLCF1,CLEC11A,CMA1,CMTM1,CMTM2,CMTM3,CMTM4,CMTM5,CMTM6,CMTM7,CMTM8,CNTF,CORT,CRH,CSF1,CSF2,CSF3,CSH1,CSH2,CSHL1,CSPG5,CTF1,CCN2,CTSG,CX3CL1,CXCL1,CXCL10,CXCL11,CXCL12,CXCL13,CXCL14,CXCL16,CXCL17,CXCL2,CXCL3,CXCL5,CXCL6,CXCL9,CCN1,DEFA1,DEFA3,DEFA5,DEFB1,DEFB103B,DEFB104A,DEFB4A,DKK1,EBI3,EDN1,EDN2,EDN3,EGF,EPGN,EPO,EREG,ESM1,FAM3B,FAM3C,FAM3D,FASLG,FGF1,FGF10,FGF11,FGF12,FGF13,FGF14,FGF16,FGF17,FGF18,FGF19,FGF2,FGF20,FGF21,FGF22,FGF23,FGF3,FGF4,FGF5,FGF6,FGF7,FGF8,FGF9,VEGFD,FIGNL2,FLT3LG,FSHB,GAL,GALP,GAST,GCG,GDF1,GDF10,GDF11,GDF15,GDF2,GDF3,GDF5,GDF6,GDF7,GDF9,GDNF,GH1,GH2,GHRH,GHRL,GIP,GKN1,GMFB,GMFG,GNRH1,GNRH2,GPHA2,GPHB5,GPI,GREM1,GREM2,GRN,GRP,GUCA2A,HAMP,HBEGF,HDGF,HDGFL3,HGF,HTN3,IAPP,IFNA1,IFNA10,IFNA13,IFNA14,IFNA16,IFNA17,IFNA2,IFNA21,IFNA4,IFNA5,IFNA6,IFNA7,IFNA8,IFNB1,IFNE,IFNG,IFNK,IFNW1,IGF1,IGF2,IL10,IL11,IL12A,IL12B,IL13,IL15,IL16,IL17A,IL17B,IL17C,IL17D,IL17F,IL18,IL19,IL1A,IL1B,IL1F10,IL36RN,IL36A,IL37,IL36B,IL36G,IL1RN,IL2,IL20,IL21,IL22,IL23A,IL24,IL25,IL26,IL27,IFNL2,IFNL3,IFNL1,IL3,IL31,IL32,IL33,IL34,IL4,IL5,IL6,IL6ST,IL7,CXCL8,IL9,INHA,INHBA,INHBB,INHBC,INHBE,INS,INS-IGF2,INSL3,INSL4,INSL5,INSL6,JAG1,JAG2,FGF7P6,FGF7P3,KITLG,KL,LACRT,LECT2,LEFTY1,LEFTY2,LEP,LHB,LIF,LRSAM1,LTA,LTB,LTBP1,LTBP2,LTBP3,LTBP4,MDK,MIA,MIF,MLN,MSTN,NAMPT,NDP,NENF,NGF,NMB,NODAL,CCN3,NPFF,NPPA,NPPB,NPPC,NPY,NRG1,NRG2,NRG3,NRG4,NRTN,NTF3,NTF4,NTS,NUDT6,OGN,OSGIN1,OSM,OSTN,OXT,ENDOU,PDGFA,PDGFB,PDGFC,PDGFD,PDGFRA,PDGFRB,PDGFRL,PDYN,PENK,PF4,PF4V1,PGF,PLAU,PMCH,PNOC,POMC,PPBP,PPBPP1,PPBPP2,PPY,PRL,PRLH,PROK1,PROK2,PSPN,PTH,PTH2,PTHLH,PTN,PYY,QRFP,RABEP1,RABEP2,REG1A,RETN,RETNLB,RLN1,RLN2,RLN3,RNASE2,S100A6,SAA1,SAA2,SBDS,SCG2,SCGB3A1,SCT,AIMP1,SECTM1,SEMA3A,SEMA3B,SEMA3C,SEMA3D,SEMA3E,SEMA3F,SEMA3G,SEMA4A,SEMA4B,SEMA4C,SEMA4D,SEMA4F,SEMA4G,SEMA5A,SEMA5B,SEMA6A,SEMA6B,SEMA6C,SEMA6D,SEMA7A,SLIT1,SLIT2,SLURP1,SPP1,SST,STC1,STC2,TAC1,TDGF1,TDGF1P3,TG,TGFA,TGFB1,TGFB2,TGFB3,THPO,TNC,TNF,TNFRSF11B,TNFSF10,TNFSF11,TNFSF12,TNFSF13,TNFSF13B,TNFSF14,TNFSF15,TNFSF18,TNFSF4,TNFSF8,TNFSF9,TOR2A,TRH,TSHB,TSLP,TXLNA,TYMP,UCN,UCN2,UCN3,UTS2,UTS2B,VEGFA,VEGFB,VEGFC,VGF,VIP,XCL1,XCL2,ACVR1B,ACVR1C,ACVR2A,ACVR2B,ACVRL1,ADCYAP1R1,ADIPOR1,ADIPOR2,ADRB1,ADRB2,AGTR1,AGTR2,AMHR2,ANGPT1,ANGPT4,ANGPTL1,ANGPTL2,ANGPTL3,ANGPTL4,ANGPTL6,APLNR,AR,AVPR1A,AVPR1B,AVPR2,BMPR1A,BMPR1B,BMPR2,BRD8,C3AR1,C5AR1,CALCR,CALCRL,ACKR2,CCR1,CCR10,CCR3,CCR4,CCR5,CCR6,CCR7,CCR8,CCR9,ACKR4,CCRL2,CD40,CMKLR1,CNTFR,CRHR1,CRHR2,CRIM1,CRLF1,CRLF2,CRLF3,CSF1R,CSF2RA,CSF2RB,CSF3R,CX3CR1,CXCR3,CXCR4,CXCR5,CXCR6,ACKR3,CYSLTR1,CYSLTR2,ACKR1,EDNRA,EDNRB,EGFR,ENG,EPOR,ESR1,ESR2,ESRRA,ESRRB,ESRRG,FGFR1,FGFR2,FGFR3,FGFR4,FGFRL1,FLT1,FLT3,FLT4,FPR1,FPR2,FPR2,FSHR,GALR2,GALR3,GCGR,GHR,GHRHR,GHSR,GIPR,GLP1R,GLP2R,GNRHR,GPER1,GPR17,GPR32,GPR33,PTGDR2,C5AR2,HNF4A,HNF4G,HTR3A,HTR3B,HTR3C,HTR3D,HTR3E,IFNAR1,IFNAR2,IFNGR1,IFNGR2,IGF1R,IGF2R,IL10RA,IL10RB,IL11RA,IL12RB1,IL12RB2,IL13RA1,IL13RA2,IL15RA,IL2RB,IL17RA,IL17RB,IL17RC,IL17RD,IL17RE,IL18R1,IL18RAP,IL1R1,IL1R2,IL1RAP,IL1RL1,IL1RL2,IL20RA,IL20RB,IL21R,IL22RA1,IL22RA2,IL23R,IL27RA,IFNLR1,IL2RA,IL2RB,IL2RG,IL31RA,IL3RA,IL4R,IL5RA,IL6R,IL7R,CXCR1,CXCR2,IL9R,INSR,KDR,LEPR,LGR4,LGR5,LGR6,LHCGR,LIFR,LTB4R,LTB4R2,LTBR,MC1R,MC2R,MC3R,MC4R,MCHR1,MCHR2,MET,MLNR,MPL,MTNR1A,MTNR1B,NGFR,NMBR,NPR1,NPR3,NR0B1,NR0B2,NR1D1,NR1D2,NR1H2,NR1H3,NR1H4,NR1I2,NR1I3,NR2C1,NR2C2,NR2E1,NR2E3,NR2F1,NR2F2,NR2F6,NR3C1,NR3C2,NR4A1,NR4A2,NR4A3,NR5A1,NR5A2,NR6A1,NRP1,NRP2,OGFR,OPRD1,OPRK1,OPRL1,OPRM1,OSMR,OXTR,PGR,PGRMC2,PLAUR,PLXNA1,PLXNA2,PLXNA3,PLXNA4,PLXNB1,PLXNB2,PLXNB3,PLXNC1,PLXND1,PPARA,PPARD,PPARG,PRLHR,PRLR,PTAFR,PTGDR,PTGDS,PTGER1,PTGER2,PTGER3,PTGER4,PTGFR,PTH1R,PTH2R,RARA,RARB,RARG,ROBO1,ROBO2,ROBO3,RORA,RORB,RORC,RXFP1,RXFP2,RXFP3,RXRA,RXRB,RXRG,S1PR1,S1PR2,SCTR,SDC1,SDC2,SDC3,SDC4,SORT1,SSTR1,SSTR2,SSTR5,ST2,TACR1,TEK,TGFBR1,TGFBR2,TGFBR3,THRA,THRB,TIE1,TNFRSF10A,TNFRSF10B,TNFRSF10C,TNFRSF10D,TNFRSF11A,TNFRSF12A,TNFRSF13B,TNFRSF13C,TNFRSF14,TNFRSF17,TNFRSF18,TNFRSF19,TNFRSF1A,TNFRSF1B,TNFRSF21,TNFRSF25,TNFRSF4,TNFRSF6B,TNFRSF8,TNFRSF9,TRHR,TSHR,TUBB3,VDR,VIPR1,VIPR2,XCR1,IFNA10,IFNA13,IFNA14,IFNA16,IFNA17,IFNA2,IFNA21,IFNA4,IFNA5,IFNA6,IFNA7,IFNA8,IFNB1,IFNE,IFNG,IFNK,IFNW1,IFNAR2,IFNGR1,IFNGR2,IL11,IL12A,IL12B,IL13,IL15,IL16,IL17A,IL17B,IL17C,IL17D,IL17F,IL18,IL19,IL1A,IL1B,IL1F10,IL36RN,IL36A,IL37,IL36B,IL36G,IL1RN,IL2,IL20,IL21,IL22,IL23A,IL24,IL25,IL26,IL27,IFNL2,IFNL3,IFNL1,IL3,IL31,IL32,IL33,IL34,IL4,IL5,IL6,IL6ST,IL7,CXCL8,IL9,TXLNA,IL10RA,IL10RB,IL11RA,IL12RB1,IL12RB2,IL13RA1,IL13RA2,IL15RA,IL2RB,IL17RA,IL17RB,IL17RC,IL17RD,IL17RE,IL18R1,IL18RAP,IL1R1,IL1R2,IL1RAP,IL1RL1,IL1RL2,IL20RA,IL20RB,IL21R,IL22RA1,IL22RA2,IL23R,IL27RA,IFNLR1,IL2RA,IL2RB,IL2RG,IL31RA,IL3RA,IL4R,IL5RA,IL6R,IL7R,CXCR1,CXCR2,IL9R,ST2,HLA-A,HLA-B,HLA-C,HLA-E,HLA-G,KIR3DL1,KIR3DL2,KIR2DL1,KIR2DL2,KIR2DL3,KIR2DL4,KIR2DL5A,KLRC1,KLRC2,KLRC3,KLRD1,PTPN6,PTPN11,ICAM1,ICAM2,ITGAL,ITGB2,PTK2B,VAV3,VAV1,VAV2,RAC1,RAC2,RAC3,PAK1,MAP2K1,MAP2K2,MAPK1,MAPK3,TNF,CSF2,IFNG,KIR2DS1,KIR2DS3,KIR2DS4,KIR2DS5,NCR2,TYROBP,LCK,FCGR3A,FCGR3B,NCR1,NCR3,FCER1G,CD247,ZAP70,SYK,LCP2,LAT,PLCG1,PLCG2,SH3BP2,PIK3CA,PIK3CB,PIK3CD,PIK3CG,PIK3R5,PIK3R1,PIK3R2,PIK3R3,FYN,SHC2,SHC4,SHC3,SHC1,GRB2,SOS1,SOS2,HRAS,KRAS,NRAS,ARAF,BRAF,RAF1,MICA,MICB,ULBP3,ULBP2,ULBP1,KLRK1,HCST,CD48,CD244,PPP3CA,PPP3CB,PPP3CC,CHP1,PPP3R1,PPP3R2,CHP2,NFAT5,NFATC1,NFATC2,NFATC3,NFATC4,PRKCA,PRKCB,PRKCG,SH2D1B,SH2D1A,IFNGR1,IFNGR2,IFNA1,IFNA2,IFNA4,IFNA5,IFNA6,IFNA7,IFNA8,IFNA10,IFNA13,IFNA14,IFNA16,IFNA17,IFNA21,IFNB1,IFNAR1,IFNAR2,TNFSF10,TNFRSF10D,TNFRSF10C,TNFRSF10B,TNFRSF10A,FASLG,FAS,GZMB,PRF1,CASP3,BID,CD3D,CD3E,CD3G,CD247,CD4,CD8A,CD8B,PTPRC,LCK,FYN,ZAP70,LCP2,LAT,ITK,TEC,NCK1,NCK2,VAV3,VAV1,VAV2,GRAP2,GRB2,PAK1,PAK2,PAK3,PAK4,PAK6,PAK5,RHOA,CDC42,PPP3CA,PPP3CB,PPP3CC,CHP1,PPP3R1,PPP3R2,CHP2,NFAT5,NFATC1,NFATC2,NFATC3,NFATC4,SOS1,SOS2,HRAS,KRAS,NRAS,FOS,JUN,CARD11,BCL10,MALT1,CHUK,IKBKB,IKBKG,NFKB1,RELA,NFKBIA,NFKBIB,NFKBIE,CD28,ICOS,CD40LG,PIK3R5,PIK3R1,PIK3R2,PIK3R3,PIK3CA,PIK3CB,PIK3CD,PIK3CG,AKT3,AKT1,AKT2,MAP3K8,MAP3K14,PDCD1,CTLA4,PTPN6,CBLC,CBL,CBLB,IL2,IL4,IL5,IL10,IFNG,CSF2,TNF,CDK4,RASGRP1,PDK1,PLCG1,PRKCQ,TRAC,TRAJ1,TRAJ2,TRAJ3,TRAJ4,TRAJ5,TRAJ6,TRAJ7,TRAJ8,TRAJ9,TRAJ10,TRAJ11,TRAJ12,TRAJ13,TRAJ14,TRAJ15,TRAJ16,TRAJ17,TRAJ18,TRAJ19,TRAJ20,TRAJ21,TRAJ22,TRAJ23,TRAJ24,TRAJ25,TRAJ26,TRAJ27,TRAJ28,TRAJ29,TRAJ30,TRAJ31,TRAJ32,TRAJ33,TRAJ34,TRAJ35,TRAJ36,TRAJ37,TRAJ38,TRAJ39,TRAJ40,TRAJ41,TRAJ42,TRAJ43,TRAJ44,TRAJ45,TRAJ46,TRAJ47,TRAJ48,TRAJ49,TRAJ50,TRAJ52,TRAJ53,TRAJ54,TRAJ56,TRAJ57,TRAJ58,TRAJ59,TRAJ61,TRAV1-1,TRAV1-2,TRAV2,TRAV3,TRAV4,TRAV5,TRAV7,TRAV8-1,TRAV8-2,TRAV8-3,TRAV8-4,TRAV8-6,TRAV8-7,TRAV9-1,TRAV9-2,TRAV10,TRAV12-1,TRAV12-2,TRAV12-3,TRAV13-1,TRAV13-2,TRAV14DV4,TRAV16,TRAV17,TRAV18,TRAV19,TRAV20,TRAV21,TRAV22,TRAV23DV6,TRAV24,TRAV25,TRAV26-1,TRAV26-2,TRAV27,TRAV29DV5,TRAV30,TRAV34,TRAV35,TRAV36DV7,TRAV38-1,TRAV38-2DV8,TRAV39,TRAV40,TRAV41,TRBC1,TRBC2,TRBD1,TRBD2,TRBJ1-1,TRBJ1-2,TRBJ1-3,TRBJ1-4,TRBJ1-5,TRBJ1-6,TRBJ2-1,TRBJ2-2,TRBJ2-3,TRBJ2-4,TRBJ2-5,TRBJ2-6,TRBJ2-7,TRBV2,TRBV3-1,TRBV4-1,TRBV4-2,TRBV4-3,TRBV5-1,TRBV5-4,TRBV5-5,TRBV5-6,TRBV5-7,TRBV5-8,TRBV6-1,TRBV6-2,TRBV6-3,TRBV6-4,TRBV6-5,TRBV6-6,TRBV6-7,TRBV6-8,TRBV6-9,TRBV7-2,TRBV7-3,TRBV7-4,TRBV7-6,TRBV7-7,TRBV7-8,TRBV7-9,TRBV9,TRBV10-1,TRBV10-2,TRBV10-3,TRBV11-1,TRBV11-2,TRBV11-3,TRBV12-3,TRBV12-4,TRBV12-5,TRBV13,TRBV14,TRBV15,TRBV16,TRBV17,TRBV18,TRBV19,TRBV20-1,TRBV24-1,TRBV25-1,TRBV27,TRBV28,TRBV29-1,TRBV30,TRDC,TRDD1,TRDD2,TRDD3,TRDJ1,TRDJ2,TRDJ3,TRDJ4,TRDV1,TRDV2,TRDV3,TRGV9,TRGV8,TRGV5,TRGV4,TRGV3,TRGV2,TRGJP2,TRGJP1,TRGJP,TRGJ2,TRGJ1,TRGC2,TRGC1,TRAV6,BMP1,BMP10,BMP15,BMP2,BMP3,BMP4,BMP5,BMP6,BMP7,BMP8A,BMP8B,GDF1,GDF10,GDF11,GDF15,GDF2,GDF3,GDF5,GDF6,GDF7,GDF9,GDNF,INHA,INHBA,INHBB,INHBC,INHBE,LEFTY1,LEFTY2,NODAL,TGFB1,TGFB2,TGFB3,ACVR1B,ACVR1C,ACVR2A,ACVR2B,ACVRL1,AMHR2,BMPR1A,BMPR1B,BMPR2,TGFBR1,TGFBR2,TGFBR3,TNFRSF11B,TNFSF10,TNFSF11,TNFSF12,TNFSF13,TNFSF13B,TNFSF14,TNFSF15,TNFSF18,TNFSF4,TNFSF8,TNFSF9,TNFRSF10B,TNFRSF10C,TNFRSF10D,TNFRSF11A,TNFRSF12A,TNFRSF13B,TNFRSF13C,TNFRSF14,TNFRSF17,TNFRSF18,TNFRSF19,TNFRSF1A,TNFRSF1B,TNFRSF21,TNFRSF25,TNFRSF4,TNFRSF6B,TNFRSF8,TNFRSF9 |
| --- |

Tab.S1. A total of 2483 immune-related genes summarized from the ImmPort website.

| CALR,CANX,CREB1,FCGRT,PDIA3,HFE,MR1,HSPA1L,HSPA4,HSPA5,HSPA8,HSP90AA1,HSP90AB1,MICA,MICB,NFYA,NFYB,NFYC,PSMC1,PSMC2,PSMC3,PSMC4,PSMC6,PSMD1,PSMD2,PSMD3,PSMD4,PSMD5,PSMD7,PSMD8,PSMD10,PSMD11,RFX5,RFXAP,AP3B1,RFXANK,PSMD6,PSME3,PSMD14,ADRM1,ECPAS,TRPC4AP,ERAP1,ULBP2,ULBP1,UBR1,RAET1G,PDIA2,LEAP2,ZC3HAV1,PGLYRP2,S100A1,LMBR1L,DEFB133,MAVS,ZC3HAV1L,IFNAR1,DEFB131B,IFNGR1,WFIKKN1,NFKB1,MBL2,SLC40A1,DDX58,LPA,RBP4,RBP5,RBP7,DUOX1,FABP9,BPIFA1,C8G,PI15,NOX1,ORM2,ORM1,MAPK1,AEN,ISG20L2,NOX3,TLR3,TFRC,IFIH1,LRP1,TRIM5,NEDD4,STAT3,TNFSF10,RNASEL,PPIA,ZYX,NLRX1,PGC,VEGFA,DHX58,TNFAIP3,MUC4,MAPT,CYLD,CST4,CSRP1,MAPK14,JUN,ITGAV,IRF5,EIF2AK2,CACYBP,NOD1,MAPK8,MAPK3,BPHL,GNAI1,WNT5A,ADAR,TYK2,TRAF3,TPT1,NEO1,AHNAK,TLR1,TK2,PRDX2,FGF2,FGA,TCF7L2,F2RL1,NFKBIZ,LMBR1,SRC,ELAVL1,SP1,SOD1,PDF,ECD,SKIV2L,DCK,DAXX,TNFRSF10A,TNFRSF10B,EED,LIMS1,BECN1,TNFSF11,JUND,JAK1,CCL28,IREB2,ILK,LTB4R,MASP2,TRIM27,RELA,DDX17,SEPTIN7,CD14,MAP2K2,MAP2K1,HRG,NDRG1,LANCL1,HMGB1,RNASE7,ABCC4,HDAC1,IFNLR1,BACH2,TANK,TBK1,PDYN,ARG2,BIRC5,ANXA6,VTN,PRDX1,AGER,UNC93B1,TNFSF4,ACTG1,ACTA1,ACO1,CCL25,TAFA2,CCL15-CCL14,CDH1,LTBP1,PPARG,MIF,JAK2,PTK2,GRK2,VAV3,VAV2,RAC1,PPP3CA,PPP3CB,PPP3CC,CHP1,PPP3R1,NFAT5,NFATC2,NFATC3,KRAS,NRAS,BCL10,MALT1,CHUK,IKBKB,IKBKG,NFKBIA,PIK3R1,PIK3R2,PIK3CA,PIK3CB,AKT1,AKT2,GSK3B,C3,CKLF,LECT2,SAA1,SAA2,SBDS,SEMA3B,SEMA3E,SEMA3F,SEMA4B,SEMA4C,SEMA4F,SEMA4G,SEMA5A,SEMA5B,SEMA6A,SEMA6C,SEMA6D,PTGDR2,LTB4R2,PLXNA1,PLXNA2,PLXNA3,PLXNB1,PLXNB2,PLXNB3,PLXNC1,ROBO1,ROBO2,RXFP3,ADM,ADM2,AGT,AMH,ANGPTL5,APLN,MANF,ARTN,BMP1,BMP2,BMP4,BMP8A,BMP8B,BTC,CALCA,CALCB,CAT,CMTM1,CMTM4,CMTM6,CMTM8,CNTF,CORT,CSPG5,DKK1,EGF,ESM1,FAM3B,FAM3C,FGF12,FGF13,VEGFD,FIGNL2,GALP,GAST,GDF11,GDF7,GDF9,GDNF,GMFB,GNRH1,GPI,GRP,HDGF,IFNK,IGF1,IGF2,IL11,IL17F,IL37,IL23A,IL6ST,INHBA,INHBB,INHBE,INSL6,KITLG,LRSAM1,LTBP3,MSTN,NAMPT,NENF,NODAL,NPPC,NRG1,NRG2,NRG3,NRG4,NRTN,NUDT6,PDGFC,PDGFRL,PSPN,PTHLH,QRFP,RABEP1,AIMP1,STC2,TGFA,TGFB2,TNFSF13,TNFSF15,TOR2A,TXLNA,ACVR1B,ACVR1C,ACVR2A,ACVR2B,ADCYAP1R1,ADIPOR1,ADIPOR2,AGTR1,ANGPT1,ANGPTL4,AVPR1A,BMPR1A,BMPR2,BRD8,CALCR,CRHR2,CRIM1,CRLF3,EGFR,EPOR,ESR1,ESRRA,ESRRG,FGFR3,FGFR4,FGFRL1,GCGR,GHR,GLP1R,GNRHR,HNF4A,HNF4G,IFNGR2,IGF1R,IGF2R,IL10RB,IL11RA,IL12RB2,IL13RA1,IL17RA,IL17RB,IL17RC,IL17RD,IL17RE,IL1R1,IL1RAP,IL1RL2,IL20RA,IL22RA1,IL31RA,IL4R,IL6R,INSR,LGR4,LGR5,LTBR,MC1R,MET,MPL,MTNR1A,MTNR1B,NMBR,NPR3,NR0B2,NR1D1,NR1D2,NR1H2,NR1H3,NR1H4,NR2C1,NR2C2,NR2E3,NR2F1,NR2F2,NR2F6,NR3C1,NR3C2,NR5A2,NR6A1,NRP1,OPRL1,OXTR,PGRMC2,PPARA,PPARD,PRLR,PTGFR,RARA,RORA,RXRA,RXRB,SCTR,SDC2,SDC4,SORT1,SSTR1,TGFBR1,TGFBR3,THRA,THRB,TNFRSF10D,TNFRSF19,TNFRSF1A,TNFRSF21,VIPR2,PTPN11,PAK1,PLCG1,SH3BP2,SHC3,SHC1,GRB2,SOS1,SOS2,ARAF,BRAF,RAF1,PRKCA,FAS,CASP3,TEC,NCK1,NCK2,PAK2,PAK4,PAK6,RHOA,CDC42,MAP3K8,MAP3K14,CBLC,CBL,CBLB,CDK4,PDK1 |
| --- |

Tab. S2 The gene list of the module_blue module selected by WGCNA.

| IFNA2,IFNA4,REG3G,DEFA6,DEFA5,DEFA4,DCD,PENK,TMSB15A,DEFB129,DEFB127,DEFB126,DEFB123,DEFB105B,DEFB118,TMSB15B,S100G,TCHHL1,FABP7,RBP2,LCN15,PMP2,LEP,EPPIN,LALBA,IL17A,HTR1A,PCSK2,GFAP,EDN3,PROK2,AMBN,AVP,BMP7,CCK,CER1,CGA,CHGA,CHGB,CRH,CSH1,CSH2,FGF11,FGF17,FGF20,FGF3,FGF6,FGF8,FGF9,GH2,GHRH,GKN1,GPHA2,IFNW1,IL9,INHA,MIA,MLN,ENDOU,PRL,PROK1,PYY,RETNLB,RLN1,RLN2,SST,TAC1,UCN2,UCN3,VGF,AMHR2,AVPR1B,GALR2,HTR3C,HTR3E,MCHR2,MLNR,NR5A1,OPRD1,PRLHR,TACR1,TRHR,PRKCG |
| --- |

Tab. S3 The gene list of the module_yellow module selected by WGCNA.

| **gene** | **HR** | **HR.95L** | **HR.95H** | **pvalue** |
| --- | --- | --- | --- | --- |
| HSPA4 | 1.73E+00 | 1.17E+00 | 2.57E+00 | 6.27E-03 |
| HSPA8 | 1.58E+00 | 1.20E+00 | 2.08E+00 | 1.30E-03 |
| HSP90AA1 | 1.53E+00 | 1.16E+00 | 2.03E+00 | 3.08E-03 |
| HSP90AB1 | 1.34E+00 | 1.02E+00 | 1.77E+00 | 3.64E-02 |
| PSMC6 | 1.97E+00 | 1.24E+00 | 3.13E+00 | 4.06E-03 |
| PSMD1 | 1.94E+00 | 1.28E+00 | 2.94E+00 | 1.80E-03 |
| PSMD8 | 1.62E+00 | 1.07E+00 | 2.46E+00 | 2.21E-02 |
| PSMD6 | 1.77E+00 | 1.07E+00 | 2.95E+00 | 2.75E-02 |
| PSMD14 | 1.67E+00 | 1.21E+00 | 2.32E+00 | 1.90E-03 |
| TRPC4AP | 1.54E+00 | 1.03E+00 | 2.31E+00 | 3.54E-02 |
| ZC3HAV1 | 1.55E+00 | 1.06E+00 | 2.27E+00 | 2.36E-02 |
| ISG20L2 | 1.41E+00 | 1.03E+00 | 1.92E+00 | 3.03E-02 |
| PPIA | 2.00E+00 | 1.37E+00 | 2.91E+00 | 3.19E-04 |
| MAPT | 1.49E+00 | 1.17E+00 | 1.90E+00 | 1.09E-03 |
| ITGAV | 1.24E+00 | 1.05E+00 | 1.46E+00 | 1.28E-02 |
| TRAF3 | 1.39E+00 | 1.04E+00 | 1.87E+00 | 2.66E-02 |
| TRIM27 | 1.50E+00 | 1.05E+00 | 2.16E+00 | 2.72E-02 |
| HRG | 9.35E-01 | 8.75E-01 | 9.99E-01 | 4.54E-02 |
| NDRG1 | 1.21E+00 | 1.03E+00 | 1.41E+00 | 2.02E-02 |
| HDAC1 | 1.56E+00 | 1.13E+00 | 2.14E+00 | 6.68E-03 |
| PRDX1 | 1.56E+00 | 1.19E+00 | 2.05E+00 | 1.32E-03 |
| RAC1 | 1.51E+00 | 1.10E+00 | 2.09E+00 | 1.17E-02 |
| NRAS | 1.42E+00 | 1.08E+00 | 1.86E+00 | 1.24E-02 |
| BCL10 | 1.41E+00 | 1.03E+00 | 1.93E+00 | 3.36E-02 |
| LECT2 | 8.91E-01 | 8.15E-01 | 9.74E-01 | 1.15E-02 |
| SEMA4F | 1.27E+00 | 1.00E+00 | 1.62E+00 | 4.58E-02 |
| SEMA6A | 1.21E+00 | 1.05E+00 | 1.39E+00 | 8.47E-03 |
| RXFP3 | 7.17E+00 | 1.21E+00 | 4.24E+01 | 2.99E-02 |
| ADM | 1.26E+00 | 1.07E+00 | 1.48E+00 | 5.71E-03 |
| ARTN | 1.54E+00 | 1.03E+00 | 2.29E+00 | 3.38E-02 |
| CALCA | 1.18E+00 | 1.05E+00 | 1.33E+00 | 5.26E-03 |
| CSPG5 | 1.41E+00 | 1.07E+00 | 1.86E+00 | 1.52E-02 |
| EGF | 1.31E+00 | 1.02E+00 | 1.68E+00 | 3.67E-02 |
| FGF13 | 1.40E+00 | 1.08E+00 | 1.80E+00 | 9.71E-03 |
| GALP | 1.40E+00 | 1.06E+00 | 1.84E+00 | 1.84E-02 |
| GMFB | 1.53E+00 | 1.14E+00 | 2.05E+00 | 4.54E-03 |
| HDGF | 1.56E+00 | 1.10E+00 | 2.21E+00 | 1.32E-02 |
| KITLG | 1.32E+00 | 1.06E+00 | 1.63E+00 | 1.15E-02 |
| NPPC | 1.77E+00 | 1.17E+00 | 2.67E+00 | 6.67E-03 |
| NRG4 | 1.57E+00 | 1.13E+00 | 2.17E+00 | 6.44E-03 |
| QRFP | 2.66E+00 | 1.17E+00 | 6.09E+00 | 2.01E-02 |
| STC2 | 1.36E+00 | 1.16E+00 | 1.59E+00 | 1.02E-04 |
| TXLNA | 1.66E+00 | 1.16E+00 | 2.37E+00 | 5.50E-03 |
| ANGPT1 | 1.37E+00 | 1.03E+00 | 1.84E+00 | 3.31E-02 |
| BRD8 | 1.41E+00 | 1.02E+00 | 1.95E+00 | 3.78E-02 |
| CALCR | 1.87E+00 | 1.29E+00 | 2.72E+00 | 9.52E-04 |
| IL1RL2 | 1.26E+00 | 1.04E+00 | 1.51E+00 | 1.53E-02 |
| MTNR1A | 4.91E+00 | 1.75E+00 | 1.38E+01 | 2.51E-03 |
| NCK1 | 1.42E+00 | 1.00E+00 | 2.01E+00 | 4.79E-02 |
| CDC42 | 1.49E+00 | 1.03E+00 | 2.17E+00 | 3.62E-02 |
| CDK4 | 1.24E+00 | 1.00E+00 | 1.53E+00 | 4.56E-02 |
| PDK1 | 1.28E+00 | 1.01E+00 | 1.64E+00 | 4.41E-02 |
| DEFA6 | 1.48E+00 | 1.02E+00 | 2.13E+00 | 3.69E-02 |
| DEFB126 | 2.29E+00 | 1.09E+00 | 4.80E+00 | 2.90E-02 |
| DEFB123 | 2.49E+01 | 5.08E+00 | 1.22E+02 | 7.32E-05 |
| S100G | 3.86E+00 | 1.32E+00 | 1.12E+01 | 1.33E-02 |
| FABP7 | 2.95E+00 | 1.69E+00 | 5.14E+00 | 1.44E-04 |
| EPPIN | 1.66E+09 | 4.58E+00 | 6.00E+17 | 3.47E-02 |
| LALBA | 9.82E+00 | 2.11E+00 | 4.56E+01 | 3.56E-03 |
| AMBN | 1.33E+00 | 1.06E+00 | 1.66E+00 | 1.26E-02 |
| CHGA | 1.30E+00 | 1.10E+00 | 1.53E+00 | 2.02E-03 |
| CRH | 1.58E+00 | 1.16E+00 | 2.16E+00 | 3.68E-03 |
| CSH1 | 1.11E+07 | 4.45E+02 | 2.78E+11 | 1.69E-03 |
| CSH2 | 2.42E+02 | 1.51E+00 | 3.88E+04 | 3.42E-02 |
| FGF11 | 3.31E+01 | 1.95E+00 | 5.60E+02 | 1.53E-02 |
| FGF9 | 4.36E+00 | 2.26E+00 | 8.38E+00 | 1.05E-05 |
| GKN1 | 4.13E+01 | 2.88E+00 | 5.92E+02 | 6.16E-03 |
| HTR3C | 2.12E+00 | 1.05E+00 | 4.27E+00 | 3.54E-02 |
| MCHR2 | 2.04E+01 | 2.07E+00 | 2.01E+02 | 9.73E-03 |
| PRLHR | 1.03E+02 | 1.01E+01 | 1.05E+03 | 9.01E-05 |
| PRKCG | 2.74E+00 | 1.24E+00 | 6.05E+00 | 1.28E-02 |

Tab.S4 71 mRNAs associated with survival selected by univariate Cox regression.

| Drug | OR | Pvalue |
| --- | --- | --- |
| Camptothecin | 2.522400878 | 0.000645123 |
| Vinblastine | 1.437372818 | 0.759808249 |
| Cisplatin | 0.949060344 | 0.407494571 |
| Cytarabine | 1.33409318 | 6.58E-06 |
| Docetaxel | 0.946688839 | 0.048040986 |
| Gefitinib | 0.879573186 | 0.002024398 |
| Navitoclax | 0.961052312 | 0.514085106 |
| Vorinostat | 1.088725518 | 0.002871802 |
| Nilotinib | 0.994952409 | 0.864273493 |
| Olaparib | 1.059822305 | 0.003627548 |
| Axitinib | 1.088308501 | 0.000490057 |
| AZD7762 | 0.883084793 | 0.021540921 |
| SB216763 | 1.028085245 | 0.015626068 |
| KU-55933 | 0.984664485 | 0.546725469 |
| Afatinib | 0.877271633 | 0.016397218 |
| Staurosporine | 0.87021734 | 0.000142616 |
| PLX-4720 | 1.172469661 | 8.16E-08 |
| NU7441 | 1.050910425 | 0.02308689 |
| Doramapimod | 1.021446171 | 0.065730619 |
| Wee1 Inhibitor | 1.063279432 | 0.987530766 |
| Nutlin-3a (-) | 1.180875372 | 6.03E-06 |
| Mirin | 1.163139709 | 0.000206587 |
| PD173074 | 0.919862507 | 1.73E-05 |
| ZM447439 | 1.00510269 | 0.926843073 |
| Alisertib | 1.068338068 | 0.456690475 |
| RO-3306 | 1.063651357 | 0.001588913 |
| MK-2206 | 0.958282094 | 0.0514506 |
| Palbociclib | 1.039440634 | 0.044719227 |
| Dactolisib | 1.191152402 | 0.014450678 |
| Pictilisib | 0.793208589 | 6.46E-06 |
| AZD8055 | 1.066834853 | 0.155253671 |
| PD0325901 | 1.00687685 | 0.831375041 |
| Obatoclax Mesylate | 1.346368732 | 0.000180408 |
| 5-Fluorouracil | 0.886804521 | 0.000393001 |
| Dasatinib | 0.755823006 | 0.00013252 |
| Paclitaxel | 0.972353714 | 0.017156024 |
| Crizotinib | 0.88181353 | 0.004687166 |
| Rapamycin | 1.449399065 | 0.517871867 |
| Sorafenib | 1.164874953 | 3.99E-08 |
| BI-2536 | 1.370195603 | 2.44E-05 |
| Irinotecan | 1.326045292 | 2.05E-05 |
| Oxaliplatin | 1.101728035 | 0.000198014 |
| BMS-536924 | 0.807795852 | 5.34E-07 |
| GSK1904529A | 1.098146272 | 0.009917199 |
| Tozasertib | 1.015523142 | 0.480663242 |
| PF-4708671 | 1.101006248 | 0.000134408 |
| PRIMA-1MET | 1.084201517 | 0.009917199 |
| Erlotinib | 0.925824444 | 0.021820219 |
| Niraparib | 1.0651099 | 0.006657678 |
| MK-1775 | 1.175785819 | 0.610135584 |
| Dinaciclib | 1.505115664 | 0.71624125 |
| Gemcitabine | 1.644206791 | 0.00115903 |
| Bortezomib | 0.914350316 | 0.234540793 |
| GSK269962A | 1.103140168 | 2.54E-05 |
| SB505124 | 1.106258717 | 0.000227473 |
| Tamoxifen | 1.032427384 | 0.042183482 |
| Fulvestrant | 0.938061797 | 0.013723533 |
| EPZ004777 | 1.030463235 | 0.064029029 |
| YK-4-279 | 0.889413581 | 0.036677526 |
| Daporinad | 3.416495869 | 0.359038998 |
| BMS-345541 | 1.212574987 | 0.006915613 |
| AZ960 | 1.130303768 | 0.083651719 |
| Talazoparib | 0.966881996 | 0.686646081 |
| XAV939 | 0.955645655 | 0.000754635 |
| Trametinib | 1.001034058 | 0.931500783 |
| Dabrafenib | 0.989852472 | 0.606718059 |
| Temozolomide | 0.963564601 | 0.037835037 |
| AZD5438 | 1.419342883 | 0.023713502 |
| IAP_5620 | 1.010556309 | 0.326746328 |
| AZD2014 | 1.093497665 | 0.062363979 |
| AZD1208 | 1.027243508 | 0.013723533 |
| AZD1332 | 1.097591766 | 0.000434212 |
| Ruxolitinib | 0.99485534 | 0.871960341 |
| Linsitinib | 1.068106147 | 0.000978497 |
| Epirubicin | 1.934866496 | 0.052870043 |
| Cyclophosphamide | 0.983900023 | 0.475814524 |
| Pevonedistat | 0.977836072 | 0.354959637 |
| Sapitinib | 0.949077828 | 0.030049928 |
| Uprosertib | 0.936525759 | 0.074488203 |
| LCL161 | 0.943564622 | 2.60E-05 |
| Lapatinib | 0.939671717 | 0.031332327 |
| Luminespib | 2.928961382 | 0.000144785 |
| Alpelisib | 0.903317352 | 0.001288652 |
| Taselisib | 0.781871525 | 8.82E-06 |
| EPZ5676 | 1.020888971 | 0.036853617 |
| SCH772984 | 0.89862447 | 0.063888887 |
| IWP-2 | 0.947430628 | 0.01701992 |
| Leflunomide | 1.048690194 | 0.002781521 |
| Entinostat | 0.961204266 | 0.478841825 |
| OSI-027 | 1.056627116 | 0.003417935 |
| LGK974 | 1.13730177 | 4.16E-05 |
| VE-822 | 0.988482679 | 0.97662258 |
| WZ4003 | 0.973241077 | 0.612190193 |
| CZC24832 | 0.968859858 | 0.017756903 |
| AZD5582 | 1.095526775 | 0.427692441 |
| GSK2606414 | 1.026204263 | 0.235696272 |
| PFI3 | 0.991783433 | 0.537019793 |
| PCI-34051 | 1.199377242 | 7.23E-07 |
| Wnt-C59 | 1.14424319 | 1.41E-05 |
| I-BET-762 | 1.035431328 | 0.21841838 |
| RVX-208 | 0.968934532 | 0.108526388 |
| OTX015 | 0.973006159 | 0.384129763 |
| GSK343 | 1.009030006 | 0.586395175 |
| ML323 | 1.075269563 | 0.012061893 |
| Entospletinib | 1.075380962 | 0.04091369 |
| PRT062607 | 0.963325243 | 0.096220622 |
| Ribociclib | 1.002502652 | 0.510312798 |
| AGI-6780 | 1.103359328 | 0.014568544 |
| Picolinici-acid | 1.027984231 | 0.049043343 |
| AZD5153 | 1.067912625 | 0.219883662 |
| CDK9_5576 | 1.440106611 | 0.206755917 |
| CDK9_5038 | 1.801333116 | 0.070347166 |
| Eg5_9814 | 1.971682947 | 0.022427319 |
| ERK_2440 | 1.354664669 | 0.000999112 |
| ERK_6604 | 1.065865472 | 0.220987242 |
| IRAK4_4710 | 1.073549006 | 0.002367794 |
| JAK1_8709 | 1.099185914 | 0.001470716 |
| AZD5991 | 1.116169261 | 0.038197388 |
| PAK_5339 | 1.042592426 | 0.05605799 |
| TAF1_5496 | 1.254805652 | 1.27E-05 |
| ULK1_4989 | 0.886857535 | 0.024916795 |
| VSP34_8731 | 1.206943409 | 0.009667684 |
| Selumetinib | 1.003530185 | 0.225815304 |
| IGF1R_3801 | 1.11235658 | 0.041203807 |
| JAK_8517 | 1.181051305 | 0.002728605 |
| AZD4547 | 0.919163587 | 0.002071452 |
| Ibrutinib | 0.992131802 | 0.589760332 |
| Zoledronate | 0.974655609 | 0.160427574 |
| Acetalax | 0.942435011 | 0.112958519 |
| Oxaliplatin | 1.101728035 | 0.000198014 |
| Carmustine | 1.00368959 | 0.698900232 |
| Topotecan | 1.637363639 | 0.002517874 |
| Teniposide | 1.768914948 | 0.009585766 |
| Mitoxantrone | 1.30915706 | 0.107455531 |
| Dactinomycin | 1.614291188 | 0.249073725 |
| Fludarabine | 1.220638861 | 6.98E-06 |
| Nelarabine | 1.106529964 | 0.000412364 |
| Fulvestrant | 0.938061797 | 0.013723533 |
| Vincristine | 1.286121819 | 0.25321514 |
| Docetaxel | 0.946688839 | 0.048040986 |
| Podophyllotoxin bromide | 1.59659308 | 0.059922838 |
| Dihydrorotenone | 1.461897284 | 3.67E-06 |
| Gallibiscoquinazole | 1.054622189 | 0.582368779 |
| Elephantin | 1.349527058 | 0.001714998 |
| Sinularin | 1.132467349 | 0.004120229 |
| Sabutoclax | 1.936663244 | 0.000102062 |
| LY2109761 | 1.088142278 | 0.032186903 |
| OF-1 | 1.179191346 | 5.78E-06 |
| MN-64 | 1.016757519 | 0.801033628 |
| KRAS (G12C) Inhibitor-12 | 1.419387964 | 7.65E-06 |
| MG-132 | 1.012256904 | 0.810864079 |
| BDP-00009066 | 0.910991711 | 0.00456005 |
| Buparlisib | 0.963582703 | 0.558485789 |
| Ulixertinib | 0.91449612 | 0.065017146 |
| Venetoclax | 1.016936764 | 0.540245372 |
| ABT737 | 0.858485965 | 0.01328111 |
| Dactinomycin | 1.614291188 | 0.249073725 |
| Afuresertib | 0.992339812 | 0.848938979 |
| AGI-5198 | 0.987172287 | 0.614247857 |
| AZD3759 | 1.013687528 | 0.93616084 |
| AZD5363 | 0.980069781 | 0.749417493 |
| AZD6738 | 1.148828169 | 0.203108097 |
| AZD8186 | 0.968872346 | 0.135051341 |
| Osimertinib | 0.886433104 | 0.005134392 |
| Cediranib | 0.887422953 | 0.00393334 |
| Ipatasertib | 0.871516409 | 0.00186424 |
| GDC0810 | 0.934545542 | 8.79E-05 |
| GNE-317 | 0.907720503 | 0.00768427 |
| GSK2578215A | 1.014216303 | 0.094475058 |
| I-BRD9 | 0.940850494 | 0.025233686 |
| Telomerase Inhibitor IX | 1.349191732 | 0.143674943 |
| MIRA-1 | 0.945600611 | 0.00112372 |
| NVP-ADW742 | 0.967291412 | 0.300943793 |
| P22077 | 1.060522206 | 0.002899404 |
| Savolitinib | 0.886880316 | 6.39E-08 |
| UMI-77 | 1.128557254 | 0.088672364 |
| WIKI4 | 0.976677322 | 0.098190305 |
| Sepantronium bromide | 0.953901777 | 0.612362523 |
| MIM1 | 0.990858367 | 0.941600327 |
| WEHI-539 | 0.989767865 | 0.977436027 |
| BPD-00008900 | 0.914074342 | 5.59E-07 |
| Foretinib | 0.893964152 | 0.000629129 |
| BIBR-1532 | 1.031369423 | 0.109822542 |
| Pyridostatin | 1.029744136 | 0.12780817 |
| AMG-319 | 0.944167577 | 0.001374581 |
| MK-8776 | 0.853196336 | 0.000415421 |
| Ulixertinib | 0.91449612 | 0.065017146 |
| Vinorelbine | 0.797003143 | 0.004861644 |
| VX-11e | 0.877820061 | 0.002406473 |
| Uprosertib | 0.936525759 | 0.074488203 |
| LJI308 | 1.000756579 | 0.369886817 |
| AZ6102 | 1.112129008 | 0.003872142 |
| GSK591 | 0.974951905 | 0.252701983 |
| VE821 | 0.97158906 | 0.854299869 |
| AZD6482 | 0.910572867 | 0.059536378 |
| AT13148 | 1.028318222 | 0.34041848 |
| BMS-754807 | 1.25051616 | 0.006079091 |
| JQ1 | 1.130922336 | 0.015293702 |

Tab. S5 The odds ratio of sensitivity to 199 drugs between high- and low-risk groups predicted by oncopredict.

| gene | lowMean | highMean | logFC | pValue | fdr |
| --- | --- | --- | --- | --- | --- |
| CYP26B1 | 1.24E+00 | 3.21E+00 | 1.38E+00 | 2.51E-02 | 4.34E-02 |
| MTMR7 | 1.07E+00 | 2.22E+00 | 1.05E+00 | 1.95E-04 | 7.59E-04 |
| CD38 | 1.35E+00 | 3.42E+00 | 1.35E+00 | 1.91E-05 | 1.12E-04 |
| MCUB | 2.48E+00 | 5.42E+00 | 1.13E+00 | 4.98E-09 | 1.79E-07 |
| ITGA3 | 5.58E+00 | 1.23E+01 | 1.13E+00 | 2.19E-03 | 5.63E-03 |
| CCL26 | 9.06E-01 | 2.99E+00 | 1.72E+00 | 6.55E-05 | 3.06E-04 |
| PRSS21 | 9.44E-01 | 1.92E+00 | 1.02E+00 | 1.48E-03 | 4.07E-03 |
| NOX1 | 8.25E-01 | 1.70E+00 | 1.04E+00 | 9.72E-05 | 4.27E-04 |
| E2F2 | 1.06E+00 | 2.39E+00 | 1.17E+00 | 4.87E-11 | 5.98E-09 |
| PRSS3 | 8.63E+00 | 2.17E+01 | 1.33E+00 | 2.35E-04 | 8.85E-04 |
| MRC2 | 5.26E+00 | 1.27E+01 | 1.27E+00 | 4.62E-03 | 1.06E-02 |
| PLAUR | 3.39E+00 | 8.45E+00 | 1.32E+00 | 4.19E-08 | 9.39E-07 |
| ANLN | 4.52E+00 | 9.99E+00 | 1.14E+00 | 1.03E-07 | 1.81E-06 |
| CLDN11 | 1.36E+00 | 3.03E+00 | 1.16E+00 | 1.89E-03 | 4.98E-03 |
| DPEP1 | 1.47E+00 | 4.13E+00 | 1.49E+00 | 1.30E-02 | 2.50E-02 |
| CNTN1 | 7.85E-01 | 2.94E+00 | 1.91E+00 | 1.00E-02 | 2.01E-02 |
| SLC11A1 | 7.46E-01 | 1.87E+00 | 1.32E+00 | 3.97E-06 | 3.23E-05 |
| HGF | 1.56E+00 | 4.48E+00 | 1.52E+00 | 5.28E-03 | 1.18E-02 |
| NLRP2 | 4.36E-01 | 1.76E+00 | 2.01E+00 | 2.18E-04 | 8.34E-04 |
| DEPDC1 | 1.75E+00 | 3.93E+00 | 1.16E+00 | 1.78E-09 | 8.88E-08 |
| CD44 | 1.09E+01 | 2.37E+01 | 1.11E+00 | 7.58E-06 | 5.42E-05 |
| SLAMF7 | 2.96E+00 | 6.95E+00 | 1.23E+00 | 3.43E-03 | 8.22E-03 |
| VCAN | 4.08E+00 | 1.09E+01 | 1.41E+00 | 1.85E-04 | 7.25E-04 |
| RAB27B | 1.13E+00 | 2.30E+00 | 1.03E+00 | 6.05E-06 | 4.51E-05 |
| MAGEC2 | 6.59E+00 | 2.52E+01 | 1.93E+00 | 2.90E-08 | 6.93E-07 |
| KCNH2 | 1.04E+00 | 2.91E+00 | 1.49E+00 | 1.05E-02 | 2.10E-02 |
| MCOLN3 | 5.89E-01 | 2.08E+00 | 1.82E+00 | 4.77E-06 | 3.70E-05 |
| NPFFR2 | 8.64E-01 | 3.18E+00 | 1.88E+00 | 9.95E-07 | 1.07E-05 |
| COL11A1 | 3.90E-01 | 3.27E+00 | 3.07E+00 | 7.11E-06 | 5.15E-05 |
| BCAT1 | 9.62E-01 | 3.80E+00 | 1.98E+00 | 2.93E-10 | 2.38E-08 |
| GPC1 | 2.04E+01 | 4.14E+01 | 1.02E+00 | 4.92E-05 | 2.41E-04 |
| EYA2 | 7.38E-01 | 1.49E+00 | 1.01E+00 | 5.68E-05 | 2.72E-04 |
| ME1 | 1.61E+01 | 3.56E+01 | 1.15E+00 | 6.05E-11 | 7.18E-09 |
| CTNNA2 | 3.91E+00 | 1.80E+00 | -1.12E+00 | 1.86E-02 | 3.37E-02 |
| PKM | 4.96E+01 | 1.11E+02 | 1.16E+00 | 6.22E-12 | 1.37E-09 |
| SYT1 | 1.30E+00 | 3.29E+00 | 1.34E+00 | 2.10E-08 | 5.54E-07 |
| PAGE1 | 1.82E+01 | 4.14E+01 | 1.19E+00 | 1.54E-09 | 8.01E-08 |
| PITX1 | 3.27E+00 | 7.88E+00 | 1.27E+00 | 4.93E-05 | 2.41E-04 |
| GUCY2C | 1.28E+00 | 4.19E+00 | 1.72E+00 | 3.42E-07 | 4.61E-06 |
| PFN2 | 6.33E+00 | 1.95E+01 | 1.62E+00 | 6.90E-10 | 4.37E-08 |
| TRIP13 | 3.83E+00 | 8.38E+00 | 1.13E+00 | 6.49E-09 | 2.25E-07 |
| FCGR2B | 1.09E+00 | 3.92E+00 | 1.84E+00 | 4.72E-06 | 3.68E-05 |
| CA12 | 5.62E+00 | 1.77E+01 | 1.66E+00 | 5.49E-06 | 4.16E-05 |
| WDR62 | 1.61E+00 | 3.24E+00 | 1.01E+00 | 1.07E-08 | 3.28E-07 |
| LAMP3 | 1.91E+00 | 3.84E+00 | 1.01E+00 | 8.27E-05 | 3.73E-04 |
| NEBL | 9.51E-01 | 1.91E+00 | 1.01E+00 | 3.84E-04 | 1.32E-03 |
| P2RY10 | 8.39E-01 | 1.71E+00 | 1.03E+00 | 1.37E-02 | 2.62E-02 |
| CDH17 | 5.14E-01 | 4.31E+00 | 3.07E+00 | 1.72E-07 | 2.70E-06 |
| SP140 | 8.67E-01 | 2.12E+00 | 1.29E+00 | 1.73E-07 | 2.71E-06 |
| ARG2 | 2.86E+00 | 6.23E+00 | 1.12E+00 | 8.49E-04 | 2.56E-03 |
| PTPRC | 4.03E+00 | 8.13E+00 | 1.01E+00 | 5.80E-03 | 1.27E-02 |
| FYB1 | 1.99E+00 | 4.26E+00 | 1.10E+00 | 2.18E-04 | 8.33E-04 |
| LINC01587 | 7.01E-01 | 1.67E+00 | 1.25E+00 | 6.20E-04 | 1.98E-03 |
| OXCT1 | 2.76E+00 | 6.39E+00 | 1.21E+00 | 1.39E-05 | 8.78E-05 |
| KIF3C | 1.60E+00 | 3.42E+00 | 1.10E+00 | 4.18E-06 | 3.36E-05 |
| SLC25A24 | 1.99E+00 | 4.36E+00 | 1.13E+00 | 1.88E-07 | 2.89E-06 |
| AKR1B1 | 1.18E+01 | 3.78E+01 | 1.69E+00 | 1.89E-11 | 2.92E-09 |
| ORC1 | 2.67E+00 | 6.31E+00 | 1.24E+00 | 1.24E-11 | 2.20E-09 |
| RAD54L | 9.61E-01 | 2.04E+00 | 1.09E+00 | 5.63E-07 | 6.78E-06 |
| MT3 | 9.42E-01 | 2.26E+00 | 1.26E+00 | 1.04E-04 | 4.51E-04 |
| PTHLH | 1.05E+00 | 5.16E+00 | 2.30E+00 | 2.11E-03 | 5.47E-03 |
| SMOX | 8.55E+00 | 1.75E+01 | 1.03E+00 | 2.07E-08 | 5.48E-07 |
| BIRC5 | 1.37E+01 | 2.87E+01 | 1.06E+00 | 6.00E-09 | 2.11E-07 |
| LAG3 | 3.15E+00 | 6.81E+00 | 1.11E+00 | 1.43E-02 | 2.71E-02 |
| CD209 | 1.72E+00 | 3.51E+00 | 1.03E+00 | 3.11E-05 | 1.67E-04 |
| KIF4A | 5.06E+00 | 1.23E+01 | 1.28E+00 | 1.16E-10 | 1.19E-08 |
| NRCAM | 2.60E+00 | 6.58E+00 | 1.34E+00 | 3.48E-10 | 2.62E-08 |
| SLC7A8 | 2.16E+00 | 5.49E+00 | 1.35E+00 | 5.82E-07 | 6.98E-06 |
| SEMA6A | 3.26E+00 | 7.37E+00 | 1.18E+00 | 3.86E-05 | 1.99E-04 |
| CLSPN | 7.65E-01 | 1.79E+00 | 1.23E+00 | 1.43E-11 | 2.38E-09 |
| CDC6 | 5.67E+00 | 1.18E+01 | 1.06E+00 | 1.22E-09 | 6.66E-08 |
| PTGS1 | 1.75E+00 | 4.12E+00 | 1.23E+00 | 4.22E-08 | 9.45E-07 |
| IL11 | 1.60E-01 | 3.56E+00 | 4.48E+00 | 2.53E-02 | 4.37E-02 |
| TREM2 | 9.25E+00 | 2.38E+01 | 1.36E+00 | 1.63E-09 | 8.31E-08 |
| CRISP3 | 2.54E+00 | 5.66E+00 | 1.16E+00 | 5.26E-03 | 1.18E-02 |
| ITPR3 | 3.06E+00 | 6.55E+00 | 1.10E+00 | 1.81E-05 | 1.08E-04 |
| CDC7 | 2.78E+00 | 5.56E+00 | 1.00E+00 | 7.05E-11 | 8.24E-09 |
| MAGEB2 | 2.56E+00 | 1.11E+01 | 2.11E+00 | 9.18E-06 | 6.29E-05 |
| IGF2-AS | 2.11E+00 | 7.54E-01 | -1.48E+00 | 5.85E-05 | 2.78E-04 |
| OSM | 7.54E-01 | 1.55E+00 | 1.04E+00 | 1.32E-04 | 5.48E-04 |
| CRYBB1 | 6.15E-01 | 1.10E+01 | 4.15E+00 | 1.53E-04 | 6.19E-04 |
| IL2RB | 3.31E+00 | 6.95E+00 | 1.07E+00 | 1.68E-04 | 6.68E-04 |
| DDHD1 | 9.29E-01 | 1.88E+00 | 1.01E+00 | 8.66E-08 | 1.60E-06 |
| CHGA | 7.66E-01 | 1.43E+01 | 4.23E+00 | 1.17E-06 | 1.23E-05 |
| PAPLN | 3.32E+00 | 7.20E+00 | 1.12E+00 | 3.95E-05 | 2.03E-04 |
| PLTP | 2.55E+01 | 6.01E+01 | 1.24E+00 | 1.48E-07 | 2.40E-06 |
| MYBL2 | 1.66E+01 | 4.06E+01 | 1.29E+00 | 2.84E-09 | 1.22E-07 |
| BIRC7 | 3.37E-01 | 3.32E+00 | 3.30E+00 | 6.72E-06 | 4.91E-05 |
| WFDC2 | 1.07E+01 | 2.46E+01 | 1.20E+00 | 6.23E-05 | 2.93E-04 |
| VSIG1 | 8.80E-01 | 6.44E+00 | 2.87E+00 | 7.31E-05 | 3.36E-04 |
| CHRDL1 | 6.31E-01 | 2.30E+00 | 1.86E+00 | 3.57E-05 | 1.87E-04 |
| RENBP | 1.36E+01 | 2.71E+01 | 1.00E+00 | 4.37E-06 | 3.48E-05 |
| CENPI | 1.12E+00 | 2.41E+00 | 1.11E+00 | 4.07E-09 | 1.57E-07 |
| TNFSF13B | 2.77E+00 | 5.88E+00 | 1.09E+00 | 1.02E-05 | 6.84E-05 |
| OLFM4 | 1.06E+00 | 1.68E+01 | 3.99E+00 | 3.29E-04 | 1.16E-03 |
| CORO2B | 8.55E-01 | 1.77E+00 | 1.05E+00 | 4.36E-03 | 1.01E-02 |
| PDGFRL | 1.36E+00 | 3.70E+00 | 1.45E+00 | 4.69E-05 | 2.32E-04 |
| JPH1 | 7.95E-01 | 1.65E+00 | 1.05E+00 | 5.48E-05 | 2.64E-04 |
| CCN4 | 1.34E+00 | 3.16E+00 | 1.24E+00 | 1.02E-02 | 2.04E-02 |
| ZC2HC1A | 1.08E+00 | 2.27E+00 | 1.07E+00 | 1.26E-11 | 2.22E-09 |
| TUSC3 | 4.25E+00 | 1.12E+01 | 1.40E+00 | 1.77E-07 | 2.76E-06 |
| DHDH | 7.38E-01 | 2.54E+00 | 1.78E+00 | 3.41E-13 | 1.80E-10 |
| IL4I1 | 2.57E+00 | 9.74E+00 | 1.92E+00 | 8.51E-09 | 2.74E-07 |
| TNNT1 | 1.06E+00 | 4.11E+00 | 1.95E+00 | 2.69E-05 | 1.48E-04 |
| CCNE1 | 5.87E+00 | 1.58E+01 | 1.43E+00 | 1.50E-09 | 7.81E-08 |
| SLC1A5 | 1.37E+01 | 3.79E+01 | 1.46E+00 | 1.81E-10 | 1.62E-08 |
| APLP1 | 2.58E+00 | 6.84E+00 | 1.41E+00 | 3.22E-05 | 1.72E-04 |
| CNFN | 3.24E+00 | 6.67E+00 | 1.04E+00 | 7.17E-04 | 2.23E-03 |
| CLEC11A | 9.84E+00 | 2.23E+01 | 1.18E+00 | 1.50E-02 | 2.82E-02 |
| PIK3CG | 8.24E-01 | 2.07E+00 | 1.33E+00 | 2.58E-04 | 9.53E-04 |
| TTC26 | 1.10E+00 | 2.22E+00 | 1.02E+00 | 1.76E-15 | 4.68E-12 |
| GHRHR | 8.40E-01 | 2.53E+00 | 1.59E+00 | 8.08E-06 | 5.69E-05 |
| IMPDH1 | 7.58E+00 | 1.83E+01 | 1.28E+00 | 2.62E-12 | 7.78E-10 |
| TSPAN13 | 3.79E+01 | 9.63E+01 | 1.35E+00 | 1.64E-08 | 4.57E-07 |
| AGR2 | 9.03E+00 | 7.01E+01 | 2.96E+00 | 2.26E-10 | 1.96E-08 |
| LHX2 | 6.51E-01 | 2.06E+00 | 1.66E+00 | 3.49E-03 | 8.35E-03 |
| DNM1 | 1.52E+00 | 3.40E+00 | 1.16E+00 | 1.19E-02 | 2.32E-02 |
| CA9 | 1.29E+01 | 6.18E+01 | 2.26E+00 | 3.25E-09 | 1.34E-07 |
| TRIM16L | 1.14E+01 | 2.52E+01 | 1.15E+00 | 2.25E-04 | 8.55E-04 |
| CNTNAP1 | 1.14E+00 | 2.62E+00 | 1.20E+00 | 5.08E-07 | 6.29E-06 |
| MYH3 | 2.83E+00 | 1.20E+00 | -1.23E+00 | 9.09E-04 | 2.71E-03 |
| PF4V1 | 8.03E-01 | 4.13E+00 | 2.36E+00 | 2.94E-06 | 2.55E-05 |
| AREG | 2.01E+00 | 5.05E+00 | 1.33E+00 | 1.90E-04 | 7.42E-04 |
| NEIL3 | 1.20E+00 | 3.37E+00 | 1.49E+00 | 7.18E-12 | 1.49E-09 |
| GLRB | 1.58E+00 | 3.58E+00 | 1.18E+00 | 1.26E-06 | 1.30E-05 |
| HGFAC | 9.92E+01 | 4.82E+01 | -1.04E+00 | 9.83E-06 | 6.61E-05 |
| NCAPG | 3.69E+00 | 7.77E+00 | 1.07E+00 | 4.28E-08 | 9.50E-07 |
| CTSC | 6.91E+00 | 1.42E+01 | 1.04E+00 | 8.45E-12 | 1.61E-09 |
| APOA4 | 1.27E+02 | 4.10E+02 | 1.69E+00 | 2.60E-04 | 9.61E-04 |
| CALCA | 1.09E+00 | 1.21E+01 | 3.47E+00 | 7.75E-04 | 2.37E-03 |
| POU2AF1 | 7.55E-01 | 1.80E+00 | 1.25E+00 | 2.92E-04 | 1.05E-03 |
| ENO2 | 2.96E+00 | 7.37E+00 | 1.32E+00 | 9.07E-07 | 9.92E-06 |
| SLCO1B3 | 1.65E+01 | 7.26E+00 | -1.19E+00 | 7.68E-04 | 2.35E-03 |
| VNN2 | 1.07E+01 | 2.79E+01 | 1.38E+00 | 1.99E-08 | 5.36E-07 |
| ARFGEF3 | 1.36E+00 | 2.89E+00 | 1.08E+00 | 1.69E-06 | 1.64E-05 |
| TTK | 2.63E+00 | 5.44E+00 | 1.05E+00 | 5.46E-08 | 1.14E-06 |
| MEP1A | 4.65E+00 | 1.75E+01 | 1.91E+00 | 1.72E-05 | 1.03E-04 |
| LOX | 2.98E+00 | 7.18E+00 | 1.27E+00 | 1.28E-04 | 5.32E-04 |
| HAVCR1 | 8.40E-01 | 4.97E+00 | 2.56E+00 | 1.84E-11 | 2.88E-09 |
| BTNL8 | 3.25E+00 | 6.57E+00 | 1.02E+00 | 4.50E-03 | 1.03E-02 |
| STC2 | 3.25E+00 | 8.89E+00 | 1.45E+00 | 7.45E-07 | 8.48E-06 |
| HRH2 | 6.35E-01 | 2.06E+00 | 1.70E+00 | 1.83E-05 | 1.09E-04 |
| PFKFB4 | 1.31E+00 | 3.41E+00 | 1.39E+00 | 3.79E-12 | 9.90E-10 |
| CSPG5 | 7.22E-01 | 1.51E+00 | 1.07E+00 | 5.79E-08 | 1.18E-06 |
| ADAM23 | 6.59E-01 | 3.66E+00 | 2.47E+00 | 2.43E-09 | 1.10E-07 |
| CENPA | 3.45E+00 | 8.08E+00 | 1.23E+00 | 3.06E-10 | 2.45E-08 |
| REG1A | 1.03E+02 | 2.67E+02 | 1.37E+00 | 4.29E-03 | 9.96E-03 |
| PLEK | 7.23E+00 | 1.73E+01 | 1.26E+00 | 7.11E-06 | 5.15E-05 |
| PRRX1 | 8.67E-01 | 2.07E+00 | 1.26E+00 | 9.97E-03 | 2.01E-02 |
| ELAPOR1 | 5.02E-01 | 2.01E+00 | 2.00E+00 | 1.05E-10 | 1.11E-08 |
| NCF2 | 8.17E+00 | 1.68E+01 | 1.04E+00 | 1.67E-06 | 1.63E-05 |
| PLA2G4A | 7.51E-01 | 1.73E+00 | 1.20E+00 | 1.79E-03 | 4.76E-03 |
| RGS2 | 1.70E+01 | 4.64E+01 | 1.45E+00 | 4.31E-08 | 9.51E-07 |
| MFAP2 | 1.48E+00 | 3.88E+00 | 1.39E+00 | 1.55E-03 | 4.23E-03 |
| ACTL8 | 2.00E+00 | 5.68E+00 | 1.50E+00 | 1.03E-02 | 2.06E-02 |
| RGS4 | 1.97E+00 | 4.27E+00 | 1.12E+00 | 2.20E-02 | 3.89E-02 |
| SLC2A1 | 3.25E+00 | 8.75E+00 | 1.43E+00 | 5.72E-14 | 6.79E-11 |
| CDC20 | 1.86E+01 | 4.79E+01 | 1.36E+00 | 3.52E-10 | 2.64E-08 |
| FASLG | 7.04E-01 | 1.45E+00 | 1.04E+00 | 4.97E-03 | 1.12E-02 |
| SPP1 | 6.12E+02 | 1.26E+03 | 1.04E+00 | 1.61E-10 | 1.50E-08 |
| CSF3R | 1.38E+00 | 3.65E+00 | 1.40E+00 | 5.46E-04 | 1.78E-03 |
| IFI27L2 | 9.68E+00 | 1.96E+01 | 1.02E+00 | 6.70E-12 | 1.43E-09 |
| TEX11 | 5.96E-01 | 2.14E+00 | 1.84E+00 | 1.16E-05 | 7.56E-05 |
| DUSP4 | 1.70E+00 | 4.19E+00 | 1.30E+00 | 1.25E-04 | 5.21E-04 |
| SCPEP1 | 2.49E+01 | 5.51E+01 | 1.15E+00 | 7.26E-13 | 2.87E-10 |
| NCAPH | 2.37E+00 | 4.77E+00 | 1.01E+00 | 3.77E-08 | 8.58E-07 |
| PLBD1 | 5.37E+00 | 1.62E+01 | 1.59E+00 | 1.12E-08 | 3.39E-07 |
| KIF18A | 1.37E+00 | 2.99E+00 | 1.12E+00 | 2.12E-07 | 3.19E-06 |
| FMOD | 1.04E+01 | 2.10E+01 | 1.02E+00 | 7.68E-03 | 1.61E-02 |
| ODF2L | 8.43E-01 | 1.72E+00 | 1.03E+00 | 2.11E-05 | 1.22E-04 |
| PTGFR | 3.23E+00 | 6.56E+00 | 1.02E+00 | 1.04E-04 | 4.48E-04 |
| PLAU | 5.55E+00 | 1.51E+01 | 1.44E+00 | 6.50E-05 | 3.04E-04 |
| TNFAIP6 | 1.30E+00 | 2.84E+00 | 1.12E+00 | 5.29E-05 | 2.57E-04 |
| RAB38 | 9.86E-01 | 2.78E+00 | 1.50E+00 | 7.40E-09 | 2.47E-07 |
| PI3 | 1.05E+01 | 3.39E+01 | 1.69E+00 | 1.87E-04 | 7.32E-04 |
| POF1B | 2.09E+00 | 5.41E+00 | 1.37E+00 | 5.53E-06 | 4.18E-05 |
| F13A1 | 4.90E+00 | 1.18E+01 | 1.27E+00 | 3.18E-05 | 1.70E-04 |
| EREG | 3.75E-01 | 2.08E+00 | 2.47E+00 | 1.18E-06 | 1.24E-05 |
| SCGB2A1 | 1.09E+00 | 3.72E+00 | 1.77E+00 | 4.56E-03 | 1.04E-02 |
| IL1B | 8.89E-01 | 1.79E+00 | 1.01E+00 | 1.10E-04 | 4.69E-04 |
| NRSN2 | 1.02E+01 | 2.16E+01 | 1.08E+00 | 1.69E-07 | 2.67E-06 |
| LAMP5 | 1.14E+00 | 8.14E+00 | 2.84E+00 | 7.39E-04 | 2.28E-03 |
| KIRREL2 | 4.74E-02 | 8.49E+00 | 7.49E+00 | 3.62E-07 | 4.81E-06 |
| SSX1 | 1.47E+01 | 3.81E+01 | 1.37E+00 | 2.23E-04 | 8.49E-04 |
| DLGAP5 | 3.73E+00 | 8.46E+00 | 1.18E+00 | 6.78E-09 | 2.32E-07 |
| CTAG2 | 5.59E+00 | 3.26E+01 | 2.54E+00 | 2.52E-09 | 1.12E-07 |
| ARMCX1 | 3.32E+00 | 7.27E+00 | 1.13E+00 | 3.89E-04 | 1.34E-03 |
| AUNIP | 7.44E-01 | 1.67E+00 | 1.17E+00 | 2.90E-09 | 1.24E-07 |
| RIBC2 | 1.50E+00 | 3.51E+00 | 1.23E+00 | 4.77E-07 | 5.98E-06 |
| STRIP2 | 7.62E-01 | 2.00E+00 | 1.39E+00 | 7.23E-10 | 4.50E-08 |
| FLNC | 4.00E+00 | 1.32E+01 | 1.72E+00 | 7.39E-05 | 3.40E-04 |
| CHN1 | 7.42E-01 | 1.89E+00 | 1.35E+00 | 1.88E-06 | 1.78E-05 |
| PIMREG | 1.32E+00 | 3.25E+00 | 1.30E+00 | 8.70E-09 | 2.80E-07 |
| AP1M2 | 1.57E+01 | 3.23E+01 | 1.04E+00 | 1.10E-05 | 7.24E-05 |
| EGLN3 | 2.53E+00 | 7.70E+00 | 1.60E+00 | 5.52E-16 | 3.77E-12 |
| RNASE1 | 1.04E+02 | 2.19E+02 | 1.08E+00 | 2.54E-07 | 3.66E-06 |
| FOXJ1 | 2.35E+00 | 6.62E+00 | 1.50E+00 | 1.34E-03 | 3.75E-03 |
| EPO | 3.24E+00 | 1.10E+01 | 1.76E+00 | 3.03E-06 | 2.61E-05 |
| FCHO1 | 7.64E-01 | 2.97E+00 | 1.96E+00 | 4.29E-08 | 9.50E-07 |
| KLHDC7B | 9.81E-01 | 2.85E+00 | 1.54E+00 | 2.32E-07 | 3.41E-06 |
| SMPDL3B | 6.70E-01 | 2.12E+00 | 1.66E+00 | 3.34E-09 | 1.37E-07 |
| PNCK | 1.49E+00 | 4.28E+00 | 1.52E+00 | 2.55E-07 | 3.67E-06 |
| ULBP2 | 9.07E-01 | 3.29E+00 | 1.86E+00 | 2.82E-08 | 6.80E-07 |
| BPIFA2 | 6.49E-01 | 1.54E+00 | 1.25E+00 | 6.46E-04 | 2.04E-03 |
| SLC6A6 | 3.17E+00 | 6.57E+00 | 1.05E+00 | 1.86E-04 | 7.29E-04 |
| GFPT2 | 1.11E+00 | 2.46E+00 | 1.15E+00 | 5.22E-03 | 1.17E-02 |
| BARX1 | 4.32E-01 | 2.71E+00 | 2.65E+00 | 5.70E-05 | 2.73E-04 |
| PPP1R1B | 9.61E-01 | 4.46E+00 | 2.22E+00 | 8.70E-04 | 2.61E-03 |
| FCRLA | 6.10E-01 | 2.83E+00 | 2.21E+00 | 1.29E-02 | 2.49E-02 |
| CARD6 | 3.50E+00 | 7.40E+00 | 1.08E+00 | 3.44E-11 | 4.62E-09 |
| POPDC3 | 5.24E-01 | 2.54E+00 | 2.28E+00 | 1.65E-09 | 8.35E-08 |
| RHBG | 5.47E+01 | 2.06E+01 | -1.41E+00 | 2.88E-03 | 7.08E-03 |
| ALOX5AP | 4.69E+00 | 1.01E+01 | 1.11E+00 | 1.46E-06 | 1.45E-05 |
| POSTN | 8.84E+00 | 1.78E+01 | 1.01E+00 | 4.88E-04 | 1.62E-03 |
| MYO18B | 6.21E-01 | 1.82E+00 | 1.55E+00 | 1.23E-06 | 1.27E-05 |
| NTS | 1.31E+02 | 5.50E+02 | 2.07E+00 | 5.77E-05 | 2.75E-04 |
| ADAMDEC1 | 1.10E+00 | 4.41E+00 | 2.00E+00 | 1.37E-04 | 5.64E-04 |
| REG4 | 2.17E-01 | 2.21E+00 | 3.35E+00 | 2.83E-03 | 6.99E-03 |
| IL2RA | 5.93E-01 | 1.54E+00 | 1.38E+00 | 3.78E-06 | 3.10E-05 |
| FOLH1B | 3.86E+00 | 1.79E+00 | -1.10E+00 | 4.68E-03 | 1.07E-02 |
| CDCA8 | 7.96E+00 | 1.71E+01 | 1.10E+00 | 3.43E-10 | 2.62E-08 |
| FHOD3 | 6.19E-01 | 1.74E+00 | 1.49E+00 | 9.11E-07 | 9.94E-06 |
| TCN1 | 7.88E-01 | 2.84E+00 | 1.85E+00 | 4.29E-05 | 2.16E-04 |
| PDGFRA | 2.70E+00 | 5.59E+00 | 1.05E+00 | 7.09E-03 | 1.51E-02 |
| HILPDA | 5.50E+00 | 1.16E+01 | 1.07E+00 | 1.23E-10 | 1.22E-08 |
| PKIB | 3.72E+00 | 1.18E+01 | 1.66E+00 | 1.62E-08 | 4.52E-07 |
| SERPINE2 | 6.87E+00 | 1.41E+01 | 1.04E+00 | 1.04E-02 | 2.08E-02 |
| ARMC9 | 7.42E-01 | 1.50E+00 | 1.02E+00 | 4.19E-13 | 1.95E-10 |
| IGF2BP3 | 7.85E-01 | 2.47E+00 | 1.65E+00 | 1.17E-08 | 3.51E-07 |
| GPNMB | 1.96E+01 | 4.95E+01 | 1.33E+00 | 3.17E-06 | 2.71E-05 |
| ST6GALNAC4 | 6.10E+00 | 1.29E+01 | 1.08E+00 | 6.59E-14 | 7.22E-11 |
| TINAG | 3.80E+00 | 1.08E+01 | 1.50E+00 | 5.52E-10 | 3.68E-08 |
| TUBB2B | 2.83E+00 | 5.98E+00 | 1.08E+00 | 2.09E-03 | 5.42E-03 |
| PI15 | 7.26E-01 | 1.49E+00 | 1.04E+00 | 1.05E-03 | 3.08E-03 |
| KIF23 | 2.28E+00 | 4.94E+00 | 1.11E+00 | 5.89E-08 | 1.19E-06 |
| TTLL7 | 6.87E-01 | 1.76E+00 | 1.35E+00 | 6.54E-13 | 2.66E-10 |
| SLC44A5 | 1.53E+00 | 3.69E+00 | 1.27E+00 | 5.47E-08 | 1.14E-06 |
| CYP1B1 | 1.08E+01 | 2.38E+01 | 1.14E+00 | 6.48E-03 | 1.40E-02 |
| TRIM54 | 8.07E-01 | 3.58E+00 | 2.15E+00 | 3.88E-09 | 1.52E-07 |
| CYP2C9 | 3.39E+02 | 1.63E+02 | -1.06E+00 | 1.24E-07 | 2.08E-06 |
| CEP55 | 2.74E+00 | 6.58E+00 | 1.26E+00 | 1.29E-08 | 3.77E-07 |
| CENPE | 1.27E+00 | 2.57E+00 | 1.01E+00 | 7.26E-08 | 1.41E-06 |
| AMIGO2 | 2.56E+00 | 6.32E+00 | 1.31E+00 | 3.03E-12 | 8.82E-10 |
| GAS2L3 | 1.89E+00 | 3.85E+00 | 1.03E+00 | 1.20E-08 | 3.60E-07 |
| RTN1 | 9.19E-01 | 2.14E+00 | 1.22E+00 | 1.54E-05 | 9.48E-05 |
| GCNT3 | 2.42E+00 | 6.98E+00 | 1.53E+00 | 4.17E-12 | 1.01E-09 |
| BCL2A1 | 3.33E+00 | 8.07E+00 | 1.28E+00 | 1.22E-04 | 5.11E-04 |
| HAPLN3 | 2.14E+00 | 4.39E+00 | 1.03E+00 | 8.90E-05 | 3.98E-04 |
| CDH11 | 1.20E+00 | 2.86E+00 | 1.25E+00 | 1.73E-03 | 4.62E-03 |
| SLC16A3 | 3.24E+00 | 9.85E+00 | 1.60E+00 | 7.23E-12 | 1.49E-09 |
| TNFRSF11A | 7.43E-01 | 1.94E+00 | 1.39E+00 | 1.69E-14 | 3.00E-11 |
| PMAIP1 | 1.15E+00 | 2.37E+00 | 1.05E+00 | 1.03E-07 | 1.81E-06 |
| FKBP10 | 1.55E+01 | 3.70E+01 | 1.25E+00 | 1.58E-02 | 2.95E-02 |
| TRPM2 | 1.16E+00 | 2.84E+00 | 1.29E+00 | 2.65E-09 | 1.16E-07 |
| EMP3 | 1.57E+01 | 3.45E+01 | 1.13E+00 | 7.33E-07 | 8.39E-06 |
| SIGLEC10 | 1.10E+00 | 2.61E+00 | 1.25E+00 | 2.35E-05 | 1.32E-04 |
| SLC2A5 | 2.11E+00 | 7.44E+00 | 1.82E+00 | 3.31E-08 | 7.72E-07 |
| KIF2C | 5.15E+00 | 1.30E+01 | 1.34E+00 | 9.62E-10 | 5.62E-08 |
| XCL1 | 1.27E+00 | 2.81E+00 | 1.14E+00 | 5.50E-05 | 2.65E-04 |
| MAEL | 2.28E+00 | 4.66E+00 | 1.03E+00 | 4.54E-05 | 2.26E-04 |
| ILDR2 | 1.08E+00 | 2.48E+00 | 1.21E+00 | 5.55E-08 | 1.15E-06 |
| FCGR2A | 4.21E+00 | 9.33E+00 | 1.15E+00 | 3.98E-11 | 5.15E-09 |
| CRABP2 | 3.17E+00 | 7.76E+00 | 1.29E+00 | 6.68E-03 | 1.43E-02 |
| CTSK | 4.47E+00 | 1.49E+01 | 1.74E+00 | 1.97E-02 | 3.54E-02 |
| HHIPL2 | 2.61E+00 | 7.09E+00 | 1.44E+00 | 1.99E-04 | 7.72E-04 |
| S100A8 | 7.48E+00 | 2.94E+01 | 1.97E+00 | 9.45E-04 | 2.80E-03 |
| AQP10 | 4.46E-01 | 2.13E+00 | 2.25E+00 | 1.22E-02 | 2.37E-02 |
| REN | 5.08E+00 | 1.88E+00 | -1.43E+00 | 1.26E-02 | 2.43E-02 |
| GULP1 | 6.06E-01 | 1.62E+00 | 1.42E+00 | 9.91E-09 | 3.11E-07 |
| FAM171B | 6.55E-01 | 1.60E+00 | 1.29E+00 | 4.38E-04 | 1.48E-03 |
| NXPE3 | 8.03E-01 | 1.74E+00 | 1.11E+00 | 8.67E-05 | 3.89E-04 |
| SLIT2 | 8.04E-01 | 1.63E+00 | 1.02E+00 | 1.36E-02 | 2.60E-02 |
| DDIT4L | 7.73E-01 | 2.30E+00 | 1.57E+00 | 6.90E-03 | 1.48E-02 |
| LHFPL2 | 3.42E+00 | 7.55E+00 | 1.14E+00 | 3.85E-10 | 2.86E-08 |
| CRHBP | 5.51E+00 | 2.52E+00 | -1.13E+00 | 1.20E-03 | 3.43E-03 |
| TPBG | 2.00E+00 | 4.13E+00 | 1.05E+00 | 2.26E-05 | 1.29E-04 |
| NLGN4X | 1.24E+00 | 2.51E+00 | 1.01E+00 | 2.32E-03 | 5.90E-03 |
| IL2RG | 4.82E+00 | 1.24E+01 | 1.36E+00 | 3.05E-07 | 4.22E-06 |
| RADX | 1.28E+00 | 2.61E+00 | 1.03E+00 | 4.23E-07 | 5.48E-06 |
| LRP12 | 8.57E-01 | 2.49E+00 | 1.54E+00 | 4.44E-13 | 1.98E-10 |
| PTGES | 5.35E+00 | 1.45E+01 | 1.44E+00 | 1.09E-07 | 1.89E-06 |
| MKI67 | 5.74E+00 | 1.17E+01 | 1.03E+00 | 5.73E-08 | 1.17E-06 |
| ADAM12 | 6.65E-01 | 1.73E+00 | 1.38E+00 | 9.83E-08 | 1.76E-06 |
| FCGR1A | 8.72E-01 | 2.52E+00 | 1.53E+00 | 1.87E-06 | 1.77E-05 |
| LYPD1 | 1.07E+00 | 2.96E+00 | 1.47E+00 | 4.38E-06 | 3.49E-05 |
| LYPD6B | 1.01E+00 | 2.33E+00 | 1.21E+00 | 9.98E-03 | 2.01E-02 |
| TMEM163 | 1.12E+00 | 2.78E+00 | 1.31E+00 | 2.28E-06 | 2.10E-05 |
| KCNK13 | 1.08E+00 | 2.32E+00 | 1.10E+00 | 1.59E-08 | 4.49E-07 |
| RAB3C | 5.78E-01 | 1.54E+00 | 1.41E+00 | 1.50E-06 | 1.48E-05 |
| DAB2 | 1.11E+01 | 2.61E+01 | 1.23E+00 | 1.99E-10 | 1.75E-08 |
| LPCAT1 | 1.40E+01 | 2.80E+01 | 1.00E+00 | 1.36E-13 | 1.13E-10 |
| CDH12 | 4.39E-01 | 2.05E+00 | 2.22E+00 | 1.48E-03 | 4.07E-03 |
| UCHL1 | 4.09E+00 | 4.52E+01 | 3.47E+00 | 1.06E-07 | 1.84E-06 |
| CHODL | 6.39E-01 | 2.16E+00 | 1.76E+00 | 2.71E-04 | 9.92E-04 |
| TMPRSS15 | 1.30E+00 | 3.28E+00 | 1.33E+00 | 3.42E-06 | 2.87E-05 |
| SKA1 | 3.83E+00 | 8.84E+00 | 1.21E+00 | 5.03E-10 | 3.46E-08 |
| SAMSN1 | 1.35E+00 | 2.75E+00 | 1.03E+00 | 1.14E-04 | 4.84E-04 |
| SLC7A7 | 4.22E+00 | 8.67E+00 | 1.04E+00 | 3.25E-06 | 2.76E-05 |
| MAGEC1 | 1.64E+00 | 5.96E+00 | 1.87E+00 | 1.87E-05 | 1.11E-04 |
| VSIG4 | 7.32E+00 | 1.66E+01 | 1.18E+00 | 9.14E-06 | 6.28E-05 |
| CLIC2 | 4.77E+00 | 9.55E+00 | 1.00E+00 | 1.39E-04 | 5.72E-04 |
| MAGEA8 | 5.30E-01 | 2.76E+00 | 2.38E+00 | 2.47E-06 | 2.23E-05 |
| BATF | 1.04E+01 | 2.07E+01 | 1.00E+00 | 4.21E-06 | 3.37E-05 |
| CXCL13 | 7.68E+00 | 2.06E+01 | 1.42E+00 | 9.17E-06 | 6.29E-05 |
| NAA11 | 2.57E-01 | 2.40E+00 | 3.22E+00 | 2.95E-09 | 1.25E-07 |
| CD109 | 2.64E+00 | 6.76E+00 | 1.35E+00 | 6.23E-13 | 2.61E-10 |
| FZD1 | 2.94E+00 | 6.45E+00 | 1.13E+00 | 3.50E-07 | 4.68E-06 |
| PWWP3B | 7.88E-01 | 2.19E+00 | 1.48E+00 | 3.43E-06 | 2.87E-05 |
| CREB3L1 | 2.95E+00 | 1.14E+01 | 1.95E+00 | 7.30E-04 | 2.26E-03 |
| GAREM2 | 1.00E+00 | 2.07E+00 | 1.05E+00 | 2.20E-06 | 2.03E-05 |
| TRIM63 | 7.35E-01 | 2.14E+00 | 1.54E+00 | 1.78E-02 | 3.25E-02 |
| COLEC12 | 9.76E-01 | 3.63E+00 | 1.90E+00 | 1.29E-08 | 3.77E-07 |
| SLC13A3 | 4.22E+01 | 1.99E+01 | -1.09E+00 | 7.24E-03 | 1.53E-02 |
| CPA2 | 9.39E-02 | 2.63E+01 | 8.13E+00 | 1.52E-03 | 4.16E-03 |
| NCF1 | 7.79E-01 | 1.80E+00 | 1.21E+00 | 6.41E-04 | 2.03E-03 |
| SLAMF8 | 9.05E-01 | 2.12E+00 | 1.23E+00 | 2.13E-04 | 8.16E-04 |
| NBL1 | 9.71E+00 | 2.02E+01 | 1.05E+00 | 8.75E-04 | 2.62E-03 |
| SLC5A11 | 1.46E+00 | 3.41E+00 | 1.22E+00 | 1.90E-05 | 1.12E-04 |
| FCER1G | 3.92E+01 | 9.80E+01 | 1.32E+00 | 2.05E-07 | 3.11E-06 |
| MPZ | 1.25E+01 | 3.21E+01 | 1.37E+00 | 7.67E-08 | 1.46E-06 |
| SV2A | 8.35E-01 | 2.01E+00 | 1.27E+00 | 5.92E-04 | 1.90E-03 |
| HOXB13 | 4.97E-01 | 1.83E+00 | 1.88E+00 | 7.80E-06 | 5.54E-05 |
| CHAF1B | 2.72E+00 | 5.82E+00 | 1.10E+00 | 5.32E-09 | 1.90E-07 |
| HK2 | 3.24E+00 | 9.67E+00 | 1.58E+00 | 2.17E-09 | 1.02E-07 |
| TFF2 | 9.81E+00 | 2.73E+01 | 1.48E+00 | 4.44E-09 | 1.67E-07 |
| TFF1 | 7.19E+00 | 3.17E+01 | 2.14E+00 | 1.65E-03 | 4.45E-03 |
| G6PD | 2.00E+01 | 6.19E+01 | 1.63E+00 | 3.70E-12 | 9.90E-10 |
| ITGB2 | 1.35E+01 | 2.71E+01 | 1.01E+00 | 4.55E-06 | 3.58E-05 |
| S100B | 9.13E-01 | 2.16E+00 | 1.24E+00 | 2.76E-04 | 1.01E-03 |
| CD3G | 9.21E-01 | 2.00E+00 | 1.12E+00 | 1.09E-03 | 3.17E-03 |
| CYP3A4 | 1.29E+03 | 4.97E+02 | -1.37E+00 | 4.88E-05 | 2.39E-04 |
| HK3 | 2.07E+00 | 4.28E+00 | 1.05E+00 | 5.66E-04 | 1.83E-03 |
| ZG16B | 1.81E+00 | 4.00E+00 | 1.14E+00 | 3.17E-06 | 2.70E-05 |
| ASRGL1 | 1.52E+00 | 4.63E+00 | 1.61E+00 | 1.01E-14 | 2.05E-11 |
| PDPN | 8.09E-01 | 2.16E+00 | 1.42E+00 | 3.13E-03 | 7.62E-03 |
| B3GALT2 | 3.96E-01 | 2.41E+00 | 2.61E+00 | 2.31E-02 | 4.05E-02 |
| VANGL2 | 1.21E+00 | 2.91E+00 | 1.26E+00 | 1.92E-02 | 3.47E-02 |
| OLFML2B | 6.32E+00 | 1.64E+01 | 1.37E+00 | 7.40E-06 | 5.31E-05 |
| FCGR3B | 5.53E-01 | 4.64E+00 | 3.07E+00 | 7.03E-04 | 2.19E-03 |
| KCNF1 | 1.34E+00 | 3.17E+00 | 1.25E+00 | 1.71E-03 | 4.58E-03 |
| SLC16A14 | 3.06E+00 | 8.41E+00 | 1.46E+00 | 7.13E-04 | 2.22E-03 |
| MSX1 | 2.19E+00 | 5.35E+00 | 1.29E+00 | 1.83E-04 | 7.20E-04 |
| S100A11 | 2.48E+02 | 5.03E+02 | 1.02E+00 | 6.68E-08 | 1.32E-06 |
| S100A9 | 4.88E+01 | 2.32E+02 | 2.25E+00 | 7.80E-11 | 8.82E-09 |
| ALPI | 2.10E+00 | 2.15E+01 | 3.36E+00 | 5.70E-08 | 1.17E-06 |
| LINC01116 | 5.89E-01 | 2.22E+00 | 1.92E+00 | 1.80E-03 | 4.79E-03 |
| CIP2A | 1.64E+00 | 3.73E+00 | 1.19E+00 | 1.44E-09 | 7.53E-08 |
| SGO2 | 1.62E+00 | 3.25E+00 | 1.00E+00 | 4.37E-09 | 1.65E-07 |
| MNDA | 3.03E+00 | 6.22E+00 | 1.04E+00 | 4.57E-04 | 1.53E-03 |
| AIM2 | 5.95E-01 | 2.03E+00 | 1.77E+00 | 1.68E-03 | 4.52E-03 |
| CXCL5 | 2.09E+00 | 1.78E+01 | 3.09E+00 | 2.47E-08 | 6.17E-07 |
| CXCL1 | 1.34E+01 | 3.97E+01 | 1.56E+00 | 3.48E-05 | 1.83E-04 |
| KIF15 | 1.66E+00 | 3.37E+00 | 1.02E+00 | 7.28E-07 | 8.36E-06 |
| LIPH | 1.25E+00 | 2.66E+00 | 1.09E+00 | 2.56E-09 | 1.14E-07 |
| S100P | 2.52E+02 | 5.66E+02 | 1.16E+00 | 5.36E-07 | 6.54E-06 |
| CDC25A | 2.24E+00 | 4.53E+00 | 1.02E+00 | 4.24E-09 | 1.62E-07 |
| RANBP3L | 1.90E+00 | 8.52E-01 | -1.16E+00 | 3.66E-05 | 1.90E-04 |
| ACSL6 | 2.03E+00 | 9.92E-01 | -1.04E+00 | 1.55E-03 | 4.23E-03 |
| CGAS | 1.07E+00 | 2.26E+00 | 1.08E+00 | 2.87E-06 | 2.50E-05 |
| FABP7 | 2.72E-02 | 3.39E+00 | 6.96E+00 | 2.75E-03 | 6.82E-03 |
| ELAPOR2 | 8.25E-01 | 1.68E+00 | 1.03E+00 | 4.04E-04 | 1.38E-03 |
| FABP5 | 3.99E+00 | 9.62E+00 | 1.27E+00 | 4.32E-05 | 2.17E-04 |
| OSR2 | 1.14E+00 | 2.33E+00 | 1.03E+00 | 1.77E-04 | 7.02E-04 |
| CTHRC1 | 9.34E+00 | 2.24E+01 | 1.26E+00 | 3.96E-06 | 3.23E-05 |
| CYBB | 7.59E+00 | 1.88E+01 | 1.31E+00 | 1.27E-06 | 1.31E-05 |
| RPL10L | 6.29E-01 | 2.21E+00 | 1.81E+00 | 6.59E-08 | 1.31E-06 |
| PPP1R14D | 1.53E+00 | 6.03E+00 | 1.98E+00 | 4.67E-06 | 3.64E-05 |
| LARP6 | 1.79E+00 | 4.04E+00 | 1.17E+00 | 5.86E-08 | 1.19E-06 |
| CLEC4E | 7.91E-01 | 1.68E+00 | 1.09E+00 | 1.19E-02 | 2.32E-02 |
| IQCD | 1.08E+00 | 2.53E+00 | 1.23E+00 | 1.58E-13 | 1.19E-10 |
| MMP10 | 1.64E+00 | 4.61E+00 | 1.49E+00 | 9.44E-06 | 6.42E-05 |
| HTR3A | 1.19E-01 | 2.71E+00 | 4.50E+00 | 5.14E-06 | 3.94E-05 |
| PCLAF | 2.23E+00 | 4.57E+00 | 1.04E+00 | 1.15E-08 | 3.47E-07 |
| PLK1 | 4.27E+00 | 9.42E+00 | 1.14E+00 | 1.24E-09 | 6.69E-08 |
| C15orf48 | 3.04E+00 | 7.06E+00 | 1.22E+00 | 2.51E-05 | 1.40E-04 |
| B4GALNT2 | 1.08E+00 | 2.36E+00 | 1.13E+00 | 4.06E-04 | 1.39E-03 |
| IGF2 | 4.79E+01 | 1.62E+01 | -1.57E+00 | 3.72E-03 | 8.83E-03 |
| CD3D | 1.24E+01 | 2.60E+01 | 1.06E+00 | 1.92E-05 | 1.12E-04 |
| LAIR1 | 2.85E+00 | 6.33E+00 | 1.15E+00 | 2.01E-07 | 3.06E-06 |
| RCOR2 | 4.84E-01 | 1.90E+00 | 1.97E+00 | 1.20E-06 | 1.25E-05 |
| RAB3IL1 | 5.99E+00 | 1.29E+01 | 1.11E+00 | 1.08E-08 | 3.31E-07 |
| FAM178B | 4.03E-01 | 2.16E+00 | 2.43E+00 | 3.42E-07 | 4.61E-06 |
| TM4SF20 | 6.20E+00 | 2.25E+01 | 1.86E+00 | 7.63E-05 | 3.49E-04 |
| VCX3A | 1.52E-01 | 3.18E+00 | 4.39E+00 | 1.32E-07 | 2.20E-06 |
| ROR2 | 8.58E-01 | 2.04E+00 | 1.25E+00 | 2.86E-02 | 4.85E-02 |
| PARM1 | 2.76E+00 | 6.67E+00 | 1.27E+00 | 2.40E-04 | 9.01E-04 |
| B3GALNT1 | 7.60E-01 | 1.74E+00 | 1.19E+00 | 5.29E-09 | 1.89E-07 |
| NR0B1 | 1.37E-01 | 3.01E+00 | 4.46E+00 | 5.85E-07 | 7.01E-06 |
| RNASE2 | 1.52E+00 | 3.53E+00 | 1.22E+00 | 1.66E-05 | 1.00E-04 |
| CXCL8 | 1.58E+01 | 3.65E+01 | 1.20E+00 | 8.89E-04 | 2.66E-03 |
| MUC15 | 5.24E-01 | 1.68E+00 | 1.68E+00 | 4.48E-08 | 9.78E-07 |
| BUB1 | 2.90E+00 | 6.21E+00 | 1.10E+00 | 6.99E-10 | 4.40E-08 |
| ITGAM | 3.42E+00 | 7.65E+00 | 1.16E+00 | 2.77E-09 | 1.20E-07 |
| ZPLD1 | 3.13E-01 | 2.99E+00 | 3.26E+00 | 2.02E-05 | 1.17E-04 |
| FABP6 | 1.83E-01 | 2.88E+00 | 3.98E+00 | 2.46E-12 | 7.46E-10 |
| TCAF2 | 1.12E+00 | 2.45E+00 | 1.12E+00 | 3.86E-10 | 2.86E-08 |
| SEMA3E | 4.31E-01 | 1.77E+00 | 2.04E+00 | 9.43E-07 | 1.02E-05 |
| COX7B2 | 1.26E+01 | 2.99E+01 | 1.25E+00 | 1.11E-05 | 7.25E-05 |
| EMB | 2.19E+00 | 4.73E+00 | 1.11E+00 | 2.91E-04 | 1.05E-03 |
| SIX2 | 9.37E-01 | 3.32E+00 | 1.83E+00 | 2.53E-03 | 6.34E-03 |
| GTSF1 | 4.01E+00 | 1.26E+01 | 1.65E+00 | 2.45E-09 | 1.10E-07 |
| PLA2G1B | 4.53E+00 | 1.21E+01 | 1.41E+00 | 1.21E-02 | 2.36E-02 |
| HAS2 | 5.62E-01 | 1.54E+00 | 1.45E+00 | 9.01E-03 | 1.84E-02 |
| HS6ST2 | 1.23E+00 | 2.69E+00 | 1.13E+00 | 1.34E-02 | 2.57E-02 |
| PKIA | 3.81E-01 | 1.80E+00 | 2.24E+00 | 1.82E-09 | 9.01E-08 |
| SHCBP1 | 1.38E+00 | 3.55E+00 | 1.36E+00 | 1.24E-10 | 1.22E-08 |
| CHST11 | 3.90E+00 | 7.95E+00 | 1.03E+00 | 2.97E-09 | 1.25E-07 |
| KRT20 | 2.28E+00 | 2.54E+01 | 3.48E+00 | 4.37E-05 | 2.19E-04 |
| MROH2B | 2.13E-01 | 2.78E+00 | 3.71E+00 | 1.77E-03 | 4.72E-03 |
| P2RY6 | 1.21E+00 | 3.86E+00 | 1.68E+00 | 7.44E-08 | 1.43E-06 |
| NMRAL2P | 4.43E+00 | 9.11E+00 | 1.04E+00 | 2.44E-07 | 3.55E-06 |
| COL8A2 | 1.11E+00 | 3.32E+00 | 1.58E+00 | 6.33E-04 | 2.01E-03 |
| RRM2 | 7.13E+00 | 1.43E+01 | 1.00E+00 | 5.82E-11 | 6.97E-09 |
| ARNT2 | 1.59E+00 | 3.23E+00 | 1.02E+00 | 3.64E-05 | 1.90E-04 |
| IL17D | 1.24E+00 | 3.26E+00 | 1.39E+00 | 1.45E-04 | 5.92E-04 |
| MUCL1 | 1.51E-01 | 3.61E+00 | 4.58E+00 | 2.13E-02 | 3.78E-02 |
| PDE3A | 1.12E+00 | 2.38E+00 | 1.10E+00 | 1.21E-02 | 2.36E-02 |
| HPSE | 9.65E-01 | 2.23E+00 | 1.21E+00 | 5.24E-07 | 6.43E-06 |
| C1QB | 1.62E+02 | 3.25E+02 | 1.00E+00 | 4.12E-05 | 2.10E-04 |
| HSPB7 | 9.41E-01 | 2.22E+00 | 1.24E+00 | 3.32E-03 | 8.01E-03 |
| MUC13 | 7.27E+01 | 1.83E+02 | 1.33E+00 | 8.70E-06 | 6.06E-05 |
| AP000769.1 | 2.76E+00 | 6.87E+00 | 1.32E+00 | 3.81E-08 | 8.65E-07 |
| CBX2 | 1.89E+00 | 4.85E+00 | 1.36E+00 | 7.12E-10 | 4.45E-08 |
| TLR1 | 2.09E+00 | 4.19E+00 | 1.00E+00 | 1.08E-05 | 7.12E-05 |
| SLC16A11 | 3.96E+01 | 1.86E+01 | -1.09E+00 | 2.55E-03 | 6.41E-03 |
| IL20RB | 1.65E+00 | 3.40E+00 | 1.04E+00 | 5.44E-10 | 3.66E-08 |
| ASPHD1 | 5.57E+00 | 1.27E+01 | 1.18E+00 | 5.12E-06 | 3.93E-05 |
| CHST2 | 2.19E+00 | 5.32E+00 | 1.28E+00 | 1.28E-04 | 5.33E-04 |
| PCSK1 | 7.69E-01 | 1.16E+01 | 3.92E+00 | 2.56E-03 | 6.41E-03 |
| LRRC25 | 4.81E+00 | 1.01E+01 | 1.07E+00 | 3.13E-05 | 1.68E-04 |
| SFN | 4.65E+01 | 1.06E+02 | 1.19E+00 | 1.08E-04 | 4.63E-04 |
| SPHK1 | 1.09E+01 | 2.22E+01 | 1.02E+00 | 6.92E-05 | 3.21E-04 |
| DCAF4L2 | 6.17E+00 | 1.39E+01 | 1.17E+00 | 1.25E-05 | 8.08E-05 |
| B3GNT5 | 2.41E+00 | 5.04E+00 | 1.07E+00 | 6.95E-06 | 5.06E-05 |
| FIBIN | 1.86E+00 | 4.59E+00 | 1.30E+00 | 3.11E-04 | 1.11E-03 |
| SAMD9L | 2.62E+00 | 5.29E+00 | 1.01E+00 | 7.25E-06 | 5.22E-05 |
| MBOAT4 | 4.83E-01 | 1.71E+00 | 1.82E+00 | 1.43E-05 | 8.95E-05 |
| CTXN1 | 1.53E+00 | 4.25E+00 | 1.47E+00 | 2.55E-03 | 6.39E-03 |
| RPP25 | 6.59E+00 | 1.41E+01 | 1.10E+00 | 1.12E-08 | 3.39E-07 |
| MSC | 6.62E+00 | 4.34E+01 | 2.71E+00 | 1.96E-07 | 3.00E-06 |
| FAM133A | 1.48E+00 | 5.64E+00 | 1.93E+00 | 8.25E-10 | 5.03E-08 |
| ARL14 | 2.08E+00 | 1.03E+01 | 2.30E+00 | 2.24E-11 | 3.32E-09 |
| PCED1B | 3.60E+00 | 8.07E+00 | 1.16E+00 | 1.38E-12 | 4.93E-10 |
| ITLN1 | 6.13E-01 | 2.06E+00 | 1.75E+00 | 1.37E-02 | 2.62E-02 |
| FZD2 | 7.87E-01 | 2.29E+00 | 1.54E+00 | 1.09E-05 | 7.17E-05 |
| SSTR2 | 1.59E+00 | 3.18E+00 | 1.00E+00 | 3.34E-04 | 1.17E-03 |
| ARSJ | 1.17E+00 | 2.43E+00 | 1.05E+00 | 3.40E-08 | 7.87E-07 |
| NQO1 | 9.83E+01 | 2.36E+02 | 1.26E+00 | 7.33E-03 | 1.55E-02 |
| CCL13 | 9.62E-01 | 2.66E+00 | 1.47E+00 | 2.06E-04 | 7.94E-04 |
| TMEM45A | 1.08E+01 | 2.78E+01 | 1.36E+00 | 7.36E-11 | 8.39E-09 |
| C6orf223 | 2.25E+00 | 5.30E+00 | 1.24E+00 | 7.59E-06 | 5.42E-05 |
| FDCSP | 1.42E+01 | 6.90E+01 | 2.28E+00 | 7.45E-03 | 1.57E-02 |
| MACIR | 1.98E+00 | 5.24E+00 | 1.40E+00 | 7.95E-16 | 3.77E-12 |
| TIGIT | 9.41E-01 | 2.02E+00 | 1.10E+00 | 6.67E-04 | 2.10E-03 |
| NXPH4 | 5.51E+00 | 1.51E+01 | 1.45E+00 | 1.01E-08 | 3.14E-07 |
| NDN | 9.49E+00 | 1.94E+01 | 1.03E+00 | 2.26E-02 | 3.97E-02 |
| ADGRG3 | 9.76E-01 | 4.22E+00 | 2.11E+00 | 4.37E-08 | 9.60E-07 |
| MX2 | 1.47E+00 | 3.06E+00 | 1.06E+00 | 8.94E-06 | 6.18E-05 |
| TNFAIP8L3 | 2.63E+00 | 5.60E+00 | 1.09E+00 | 9.14E-12 | 1.71E-09 |
| TREML3P | 8.44E-01 | 4.47E+00 | 2.41E+00 | 5.56E-07 | 6.73E-06 |
| C1QTNF12 | 1.10E+00 | 2.47E+00 | 1.17E+00 | 9.32E-04 | 2.77E-03 |
| EFNA5 | 9.50E-01 | 3.14E+00 | 1.72E+00 | 3.05E-06 | 2.62E-05 |
| CSF1 | 1.31E+01 | 2.84E+01 | 1.12E+00 | 1.17E-08 | 3.51E-07 |
| LPAR5 | 1.11E+00 | 2.42E+00 | 1.12E+00 | 2.86E-08 | 6.86E-07 |
| CDCA2 | 1.47E+00 | 3.25E+00 | 1.15E+00 | 2.36E-08 | 5.98E-07 |
| SMIM10 | 2.24E+00 | 4.63E+00 | 1.05E+00 | 5.51E-03 | 1.22E-02 |
| ARMCX2 | 2.23E+00 | 4.51E+00 | 1.01E+00 | 9.04E-03 | 1.85E-02 |
| MUC6 | 4.74E+00 | 2.18E+01 | 2.20E+00 | 1.78E-02 | 3.24E-02 |
| GPRIN3 | 1.60E+00 | 3.33E+00 | 1.06E+00 | 9.63E-06 | 6.52E-05 |
| NDUFA4L2 | 1.88E+01 | 4.55E+01 | 1.28E+00 | 2.65E-06 | 2.34E-05 |
| PRAME | 5.49E+00 | 1.35E+01 | 1.30E+00 | 2.96E-03 | 7.26E-03 |
| SAPCD2 | 1.22E+00 | 2.65E+00 | 1.12E+00 | 4.11E-08 | 9.22E-07 |
| GLDN | 1.17E+00 | 3.62E+00 | 1.63E+00 | 1.91E-13 | 1.30E-10 |
| NAP1L2 | 1.65E+00 | 3.66E+00 | 1.15E+00 | 2.35E-11 | 3.45E-09 |
| LILRB4 | 2.10E+00 | 4.89E+00 | 1.22E+00 | 5.83E-05 | 2.78E-04 |
| ERCC6L | 7.80E-01 | 1.78E+00 | 1.19E+00 | 4.09E-09 | 1.57E-07 |
| TNFRSF18 | 2.75E+00 | 5.79E+00 | 1.07E+00 | 8.72E-07 | 9.63E-06 |
| FAM183A | 6.21E-01 | 1.65E+00 | 1.41E+00 | 9.65E-07 | 1.04E-05 |
| EMID1 | 5.68E+00 | 1.22E+01 | 1.10E+00 | 1.45E-02 | 2.74E-02 |
| GCNT1 | 5.39E-01 | 1.83E+00 | 1.77E+00 | 2.75E-06 | 2.42E-05 |
| CIDEC | 3.52E+00 | 1.05E+01 | 1.58E+00 | 2.03E-09 | 9.69E-08 |
| TRPV2 | 5.33E+00 | 1.09E+01 | 1.03E+00 | 2.06E-05 | 1.19E-04 |
| LIN28B | 4.67E-01 | 2.82E+00 | 2.59E+00 | 9.95E-10 | 5.72E-08 |
| DMBT1 | 3.54E-01 | 5.46E+00 | 3.95E+00 | 7.15E-04 | 2.22E-03 |
| S100A3 | 1.36E+00 | 3.19E+00 | 1.23E+00 | 9.16E-03 | 1.87E-02 |
| RAB42 | 1.33E+00 | 3.54E+00 | 1.41E+00 | 1.58E-08 | 4.48E-07 |
| COL4A5 | 1.48E+00 | 3.37E+00 | 1.19E+00 | 2.98E-08 | 7.09E-07 |
| PLA2G2A | 5.11E+02 | 1.03E+03 | 1.02E+00 | 5.70E-03 | 1.26E-02 |
| SELL | 4.06E+00 | 8.36E+00 | 1.04E+00 | 5.37E-03 | 1.20E-02 |
| CALHM6 | 1.05E+00 | 2.44E+00 | 1.22E+00 | 1.07E-02 | 2.12E-02 |
| SPOCK3 | 4.77E-01 | 3.57E+00 | 2.90E+00 | 9.05E-04 | 2.70E-03 |
| SPTSSB | 5.94E-01 | 2.50E+00 | 2.07E+00 | 9.98E-04 | 2.93E-03 |
| HRH1 | 6.69E-01 | 1.54E+00 | 1.20E+00 | 3.00E-06 | 2.59E-05 |
| S100A2 | 1.02E+00 | 2.81E+00 | 1.47E+00 | 3.09E-04 | 1.11E-03 |
| GAL3ST4 | 1.69E+00 | 4.12E+00 | 1.28E+00 | 5.54E-07 | 6.73E-06 |
| MAGEA6 | 6.32E+00 | 2.39E+01 | 1.92E+00 | 1.73E-09 | 8.73E-08 |
| C6orf141 | 1.88E+00 | 3.98E+00 | 1.08E+00 | 4.07E-06 | 3.29E-05 |
| UAP1L1 | 3.31E+00 | 8.61E+00 | 1.38E+00 | 5.97E-06 | 4.45E-05 |
| PDCD1LG2 | 1.07E+00 | 2.84E+00 | 1.40E+00 | 6.95E-04 | 2.17E-03 |
| KEL | 1.63E+00 | 6.53E+00 | 2.00E+00 | 5.52E-04 | 1.80E-03 |
| TUBA3C | 2.46E+00 | 1.55E+01 | 2.66E+00 | 2.49E-07 | 3.60E-06 |
| AKR1B10 | 6.45E+02 | 1.40E+03 | 1.11E+00 | 2.27E-05 | 1.29E-04 |
| LPAR1 | 9.60E-01 | 2.57E+00 | 1.42E+00 | 2.30E-03 | 5.86E-03 |
| C2CD4A | 3.59E+00 | 7.29E+00 | 1.02E+00 | 1.07E-06 | 1.14E-05 |
| MAGEA1 | 8.89E+00 | 2.59E+01 | 1.54E+00 | 1.25E-06 | 1.29E-05 |
| RASSF9 | 1.11E+00 | 2.89E+00 | 1.38E+00 | 2.19E-03 | 5.62E-03 |
| SELENOM | 2.41E+01 | 5.32E+01 | 1.14E+00 | 2.86E-11 | 4.03E-09 |
| TOX | 1.31E+00 | 3.62E+00 | 1.47E+00 | 1.23E-08 | 3.63E-07 |
| CSAG1 | 6.39E+00 | 2.25E+01 | 1.81E+00 | 4.50E-07 | 5.73E-06 |
| SAMD5 | 2.18E+00 | 4.45E+00 | 1.03E+00 | 1.08E-05 | 7.15E-05 |
| FCGR3A | 2.19E+01 | 5.04E+01 | 1.21E+00 | 4.26E-07 | 5.50E-06 |
| CD177 | 2.20E-01 | 2.18E+00 | 3.31E+00 | 8.03E-04 | 2.44E-03 |
| AL713899.1 | 6.85E-01 | 1.80E+00 | 1.39E+00 | 1.76E-04 | 6.97E-04 |
| TRBV6-5 | 6.27E-01 | 1.53E+00 | 1.28E+00 | 3.30E-03 | 7.98E-03 |
| RTL8B | 3.28E+00 | 6.98E+00 | 1.09E+00 | 1.22E-03 | 3.47E-03 |
| FAM24B | 1.03E+00 | 2.48E+00 | 1.26E+00 | 9.46E-07 | 1.03E-05 |
| MLLT11 | 3.28E+00 | 6.90E+00 | 1.07E+00 | 1.67E-03 | 4.48E-03 |
| TOMM40P4 | 6.79E-01 | 1.50E+00 | 1.15E+00 | 6.86E-09 | 2.34E-07 |
| MAGEA12 | 3.97E+00 | 1.43E+01 | 1.85E+00 | 1.11E-05 | 7.30E-05 |
| AKR1B10P1 | 2.11E+00 | 6.26E+00 | 1.57E+00 | 3.95E-05 | 2.03E-04 |
| CYCSP6 | 6.17E-01 | 1.77E+00 | 1.52E+00 | 3.22E-07 | 4.41E-06 |
| MUC5AC | 8.61E-01 | 2.17E+00 | 1.33E+00 | 7.14E-03 | 1.52E-02 |
| AC093850.1 | 5.19E-01 | 1.97E+00 | 1.93E+00 | 4.86E-06 | 3.76E-05 |
| ACTBP8 | 3.33E-01 | 2.43E+00 | 2.87E+00 | 6.93E-06 | 5.05E-05 |
| AL139095.2 | 6.28E-01 | 1.56E+00 | 1.31E+00 | 7.24E-03 | 1.53E-02 |
| MAGEA3 | 8.49E+00 | 2.91E+01 | 1.78E+00 | 7.41E-09 | 2.47E-07 |
| TRIM16 | 5.42E+00 | 1.19E+01 | 1.13E+00 | 8.17E-05 | 3.70E-04 |
| RNY3P8 | 2.20E+00 | 4.45E+00 | 1.02E+00 | 1.02E-05 | 6.81E-05 |
| LINC02561 | 7.68E-01 | 1.56E+00 | 1.02E+00 | 1.29E-05 | 8.28E-05 |
| POU6F2-AS1 | 1.83E+00 | 4.03E+00 | 1.14E+00 | 2.02E-02 | 3.62E-02 |
| FAM96AP2 | 1.02E+00 | 2.31E+00 | 1.18E+00 | 7.30E-03 | 1.55E-02 |
| ZNF812P | 7.68E-01 | 1.79E+00 | 1.22E+00 | 5.22E-03 | 1.17E-02 |
| PPP4R3C | 1.33E+00 | 2.91E+00 | 1.13E+00 | 3.25E-05 | 1.73E-04 |
| HSPA7 | 3.16E+00 | 9.98E+00 | 1.66E+00 | 5.06E-04 | 1.67E-03 |
| LHFPL3-AS2 | 7.55E-01 | 2.43E+00 | 1.69E+00 | 3.94E-07 | 5.18E-06 |
| LINC02476 | 8.69E-01 | 1.98E+00 | 1.19E+00 | 2.13E-06 | 1.98E-05 |
| LINC01980 | 5.94E-01 | 1.69E+00 | 1.51E+00 | 2.73E-09 | 1.19E-07 |
| ELFN1 | 1.77E+01 | 8.48E+00 | -1.06E+00 | 1.00E-09 | 5.72E-08 |
| Z98257.1 | 1.43E+00 | 2.89E+00 | 1.02E+00 | 6.02E-03 | 1.31E-02 |
| ATP5MC1P4 | 9.16E-01 | 1.84E+00 | 1.01E+00 | 9.87E-09 | 3.11E-07 |
| AKR1B15 | 2.79E+00 | 8.97E+00 | 1.68E+00 | 4.53E-06 | 3.57E-05 |
| AL391056.1 | 6.47E-01 | 1.93E+00 | 1.57E+00 | 1.96E-04 | 7.61E-04 |
| TMSB10P1 | 8.69E-01 | 1.87E+00 | 1.11E+00 | 5.48E-04 | 1.78E-03 |
| SCTR-AS1 | 1.48E+00 | 2.99E+00 | 1.02E+00 | 1.15E-02 | 2.25E-02 |
| LINC01436 | 3.59E+00 | 7.29E+00 | 1.02E+00 | 7.10E-09 | 2.40E-07 |
| ZNF826P | 6.42E-01 | 1.73E+00 | 1.43E+00 | 3.38E-07 | 4.59E-06 |
| PIK3CD-AS2 | 1.03E+00 | 3.40E+00 | 1.72E+00 | 6.44E-07 | 7.59E-06 |
| IGHV3-43 | 3.54E+00 | 1.14E+01 | 1.69E+00 | 3.09E-03 | 7.54E-03 |
| AL158819.1 | 8.19E-01 | 2.99E+00 | 1.87E+00 | 1.13E-07 | 1.93E-06 |
| RPS2P32 | 7.88E-01 | 1.90E+00 | 1.27E+00 | 4.37E-09 | 1.65E-07 |
| MTND4P20 | 4.10E+01 | 1.96E+01 | -1.06E+00 | 9.02E-06 | 6.22E-05 |
| AC011294.1 | 6.94E-01 | 1.54E+00 | 1.15E+00 | 8.74E-07 | 9.64E-06 |
| UBE2SP1 | 7.37E-01 | 1.68E+00 | 1.19E+00 | 3.63E-13 | 1.85E-10 |
| PAGE2 | 1.27E+01 | 3.60E+01 | 1.50E+00 | 6.71E-04 | 2.11E-03 |
| AL035446.1 | 1.98E+00 | 4.82E+00 | 1.29E+00 | 5.94E-04 | 1.91E-03 |
| AL772337.3 | 1.43E+00 | 3.66E+00 | 1.35E+00 | 2.12E-08 | 5.57E-07 |
| LINC01287 | 1.65E+00 | 5.34E+00 | 1.69E+00 | 1.66E-05 | 1.00E-04 |
| AC019117.1 | 8.15E-01 | 2.17E+00 | 1.41E+00 | 3.78E-06 | 3.10E-05 |
| GAPDHP14 | 5.25E-01 | 1.84E+00 | 1.81E+00 | 6.99E-06 | 5.08E-05 |
| ELFN1-AS1 | 1.26E+00 | 4.04E+00 | 1.68E+00 | 1.97E-02 | 3.53E-02 |
| CLEC2L | 3.86E-01 | 2.55E+00 | 2.72E+00 | 1.75E-08 | 4.80E-07 |
| FOXD2-AS1 | 3.14E+00 | 6.43E+00 | 1.03E+00 | 2.67E-08 | 6.55E-07 |
| HLA-DQA2 | 1.60E+01 | 3.26E+01 | 1.03E+00 | 3.33E-03 | 8.04E-03 |
| LINC01589 | 9.87E-01 | 2.09E+00 | 1.08E+00 | 1.84E-04 | 7.24E-04 |
| PAGE2B | 1.01E+01 | 2.38E+01 | 1.24E+00 | 1.67E-02 | 3.08E-02 |
| SMKR1 | 5.47E-01 | 2.01E+00 | 1.88E+00 | 1.42E-13 | 1.13E-10 |
| UGT1A10 | 5.75E-01 | 2.57E+00 | 2.16E+00 | 9.53E-05 | 4.20E-04 |
| KC877373.1 | 5.96E-01 | 1.80E+00 | 1.60E+00 | 7.34E-03 | 1.55E-02 |
| LEFTY1 | 4.92E-01 | 2.81E+00 | 2.51E+00 | 4.65E-06 | 3.63E-05 |
| TUBA4B | 7.77E-01 | 2.16E+00 | 1.48E+00 | 8.62E-08 | 1.60E-06 |
| AC117386.2 | 8.02E-01 | 1.62E+00 | 1.02E+00 | 2.94E-03 | 7.20E-03 |
| RPL18P13 | 1.09E+00 | 2.22E+00 | 1.02E+00 | 2.29E-04 | 8.67E-04 |
| FCGR2C | 7.37E-01 | 1.75E+00 | 1.25E+00 | 1.36E-05 | 8.63E-05 |
| MIR210HG | 2.78E+00 | 5.80E+00 | 1.06E+00 | 3.69E-06 | 3.04E-05 |
| AC090204.1 | 1.09E+00 | 2.53E+00 | 1.21E+00 | 2.61E-06 | 2.32E-05 |
| AC147055.1 | 2.43E+00 | 4.97E+00 | 1.03E+00 | 1.38E-03 | 3.84E-03 |
| SMIM31 | 6.50E-01 | 1.89E+00 | 1.54E+00 | 1.15E-05 | 7.49E-05 |
| AC106771.1 | 5.67E-01 | 1.67E+00 | 1.56E+00 | 1.93E-07 | 2.97E-06 |
| CASC9 | 2.39E+00 | 5.38E+00 | 1.17E+00 | 2.46E-07 | 3.57E-06 |
| LINC00942 | 2.62E+00 | 1.38E+01 | 2.40E+00 | 4.26E-04 | 1.45E-03 |
| TMEM158 | 1.22E+00 | 5.49E+00 | 2.16E+00 | 1.92E-04 | 7.49E-04 |
| AC114786.2 | 1.36E+00 | 3.54E+00 | 1.38E+00 | 2.65E-06 | 2.34E-05 |
| ZFPM2-AS1 | 1.80E+00 | 5.82E+00 | 1.69E+00 | 6.30E-08 | 1.26E-06 |
| LINC02506 | 2.04E+00 | 5.55E+00 | 1.45E+00 | 2.33E-09 | 1.07E-07 |
| LINC01843 | 6.84E+00 | 1.38E+01 | 1.02E+00 | 2.36E-05 | 1.33E-04 |
| TMEM92-AS1 | 8.26E-01 | 1.90E+00 | 1.20E+00 | 3.33E-07 | 4.52E-06 |
| RFPL4B | 6.42E-01 | 2.99E+00 | 2.22E+00 | 4.00E-08 | 9.02E-07 |
| LINC02384 | 1.61E+00 | 3.84E+00 | 1.26E+00 | 2.76E-07 | 3.90E-06 |
| LINC02315 | 8.77E-01 | 2.11E+00 | 1.26E+00 | 3.78E-05 | 1.95E-04 |
| AC090192.2 | 4.08E-01 | 2.79E+00 | 2.77E+00 | 1.80E-08 | 4.91E-07 |
| AP003469.2 | 7.62E-01 | 2.42E+00 | 1.67E+00 | 5.39E-12 | 1.24E-09 |
| AC107959.3 | 9.66E-01 | 2.24E+00 | 1.21E+00 | 3.91E-09 | 1.53E-07 |
| LINC01419 | 1.32E+01 | 3.87E+01 | 1.55E+00 | 2.84E-05 | 1.55E-04 |
| AC105118.1 | 1.86E+00 | 7.34E+00 | 1.98E+00 | 8.29E-04 | 2.51E-03 |
| MAFA-AS1 | 1.80E+00 | 8.76E+00 | 2.28E+00 | 1.15E-04 | 4.88E-04 |
| AC027031.2 | 6.21E-01 | 2.37E+00 | 1.93E+00 | 2.85E-04 | 1.04E-03 |
| RTL1 | 3.49E-02 | 2.57E+00 | 6.20E+00 | 1.81E-02 | 3.30E-02 |
| EID3 | 8.42E-01 | 1.73E+00 | 1.03E+00 | 1.03E-07 | 1.81E-06 |
| AP001972.4 | 9.65E-02 | 2.25E+00 | 4.54E+00 | 8.73E-08 | 1.61E-06 |
| AC104031.1 | 1.93E+00 | 4.10E+00 | 1.09E+00 | 2.46E-04 | 9.19E-04 |
| PRECSIT | 8.11E-01 | 1.84E+00 | 1.18E+00 | 5.50E-08 | 1.14E-06 |
| ZNF486 | 7.05E-01 | 2.09E+00 | 1.57E+00 | 6.89E-06 | 5.02E-05 |
| AC079360.1 | 3.57E+00 | 1.66E+00 | -1.10E+00 | 5.16E-05 | 2.51E-04 |
| AC084375.1 | 1.43E+01 | 4.53E+00 | -1.65E+00 | 8.44E-04 | 2.55E-03 |
| MGAM2 | 3.57E-01 | 1.87E+00 | 2.39E+00 | 1.23E-09 | 6.67E-08 |
| AC026765.3 | 1.76E+00 | 8.22E-01 | -1.10E+00 | 1.56E-05 | 9.60E-05 |
| AL139023.1 | 6.36E-01 | 1.85E+00 | 1.54E+00 | 1.20E-06 | 1.25E-05 |
| LINC02404 | 8.95E-01 | 2.51E+00 | 1.49E+00 | 2.53E-06 | 2.27E-05 |
| AC025575.2 | 7.67E-01 | 1.88E+00 | 1.29E+00 | 9.73E-04 | 2.87E-03 |
| LINC02313 | 5.77E-01 | 1.56E+00 | 1.43E+00 | 1.16E-10 | 1.19E-08 |
| LINC00239 | 8.31E-01 | 2.85E+00 | 1.78E+00 | 1.41E-07 | 2.31E-06 |
| AL133370.1 | 4.27E-01 | 2.27E+00 | 2.41E+00 | 7.41E-07 | 8.46E-06 |
| TRAV30 | 2.20E+00 | 4.87E+00 | 1.15E+00 | 2.58E-05 | 1.43E-04 |
| AC023906.5 | 1.36E+00 | 4.18E+00 | 1.62E+00 | 1.72E-03 | 4.60E-03 |
| AC012236.1 | 2.18E+00 | 4.39E+00 | 1.01E+00 | 2.03E-08 | 5.40E-07 |
| RARRES2P8 | 2.12E+00 | 5.14E+00 | 1.28E+00 | 1.29E-08 | 3.78E-07 |
| AC124798.1 | 1.00E+00 | 2.74E+00 | 1.45E+00 | 2.14E-08 | 5.62E-07 |
| SERTM2 | 2.17E+00 | 5.03E+00 | 1.22E+00 | 6.28E-03 | 1.36E-02 |
| WFDC21P | 1.63E+00 | 5.37E+00 | 1.72E+00 | 9.72E-03 | 1.96E-02 |
| MYMX | 7.09E-01 | 2.67E+00 | 1.91E+00 | 1.70E-02 | 3.13E-02 |
| MMP12 | 1.35E+00 | 1.08E+01 | 3.00E+00 | 9.25E-08 | 1.69E-06 |
| AC007639.1 | 8.15E-01 | 1.66E+00 | 1.03E+00 | 4.18E-07 | 5.43E-06 |
| AC138207.3 | 1.47E+00 | 3.14E+00 | 1.09E+00 | 4.20E-05 | 2.13E-04 |
| AC023090.1 | 8.88E-01 | 2.83E+00 | 1.67E+00 | 2.67E-03 | 6.64E-03 |
| AC016885.3 | 2.09E+00 | 4.75E+00 | 1.19E+00 | 1.37E-08 | 3.97E-07 |
| CSAG3 | 1.14E+00 | 3.28E+00 | 1.53E+00 | 5.11E-11 | 6.17E-09 |
| MTRNR2L12 | 5.81E+00 | 2.66E+00 | -1.13E+00 | 1.34E-03 | 3.74E-03 |
| SPIB | 1.28E+00 | 3.99E+00 | 1.64E+00 | 1.21E-02 | 2.36E-02 |
| MTCO2P22 | 2.07E+00 | 5.48E-01 | -1.92E+00 | 1.86E-02 | 3.37E-02 |
| AL162413.1 | 6.81E+00 | 1.70E+01 | 1.32E+00 | 5.92E-06 | 4.42E-05 |
| LINC00221 | 8.82E-01 | 2.58E+00 | 1.55E+00 | 1.65E-05 | 1.00E-04 |
| AC012073.1 | 7.27E-01 | 1.63E+00 | 1.17E+00 | 1.06E-08 | 3.27E-07 |
| AC008592.4 | 6.69E-01 | 1.81E+00 | 1.44E+00 | 1.36E-03 | 3.79E-03 |
| AC069294.1 | 1.53E+00 | 5.69E-01 | -1.43E+00 | 4.17E-03 | 9.73E-03 |
| CEACAM20 | 2.46E+00 | 5.02E+00 | 1.03E+00 | 2.28E-02 | 4.00E-02 |
| AC132807.2 | 4.56E-01 | 1.74E+00 | 1.93E+00 | 7.84E-08 | 1.49E-06 |
| FCGBP | 1.89E+00 | 5.52E+00 | 1.54E+00 | 1.95E-09 | 9.46E-08 |
| PRSS2 | 3.66E-01 | 5.23E+01 | 7.16E+00 | 8.59E-03 | 1.77E-02 |
| UHRF1 | 2.79E+00 | 6.10E+00 | 1.13E+00 | 1.19E-07 | 2.02E-06 |
| AC239859.5 | 6.00E-01 | 1.96E+00 | 1.71E+00 | 3.15E-05 | 1.69E-04 |
| ZNF229 | 8.62E-01 | 1.88E+00 | 1.13E+00 | 1.14E-04 | 4.82E-04 |
| AC068506.1 | 7.65E-01 | 1.60E+00 | 1.06E+00 | 1.22E-03 | 3.48E-03 |
| AC011447.7 | 5.89E-01 | 2.19E+00 | 1.89E+00 | 6.13E-10 | 4.01E-08 |
| LINC01667 | 1.06E+00 | 2.39E+00 | 1.17E+00 | 7.09E-05 | 3.28E-04 |
| ADORA3 | 1.07E+00 | 2.70E+00 | 1.34E+00 | 1.18E-07 | 2.01E-06 |
| FRG1GP | 2.82E+00 | 6.05E+00 | 1.10E+00 | 5.23E-07 | 6.42E-06 |
| FRG1FP | 2.09E+00 | 6.46E+00 | 1.63E+00 | 1.96E-07 | 3.00E-06 |
| LBHD2 | 8.27E-01 | 1.70E+00 | 1.04E+00 | 2.69E-03 | 6.70E-03 |
| AL157371.2 | 2.18E-01 | 2.56E+00 | 3.56E+00 | 4.56E-05 | 2.27E-04 |
| AL445205.1 | 1.76E+00 | 5.21E+00 | 1.56E+00 | 1.59E-04 | 6.40E-04 |
| AC083855.2 | 1.59E+00 | 3.28E+00 | 1.05E+00 | 1.21E-07 | 2.04E-06 |
| CR589904.2 | 8.50E-01 | 1.95E+00 | 1.20E+00 | 8.50E-05 | 3.83E-04 |
| LCAL1 | 1.08E+00 | 4.74E+00 | 2.13E+00 | 2.09E-04 | 8.04E-04 |
| AP006222.2 | 1.79E+00 | 8.87E+00 | 2.31E+00 | 1.38E-09 | 7.29E-08 |
| AL079338.1 | 7.03E-01 | 1.80E+00 | 1.36E+00 | 2.58E-04 | 9.54E-04 |
| AC064869.1 | 7.95E-01 | 2.02E+00 | 1.35E+00 | 5.00E-08 | 1.06E-06 |
| AL161645.2 | 1.32E+00 | 6.42E-01 | -1.04E+00 | 2.93E-05 | 1.59E-04 |
| AL590550.1 | 3.96E+00 | 1.09E+01 | 1.46E+00 | 3.83E-07 | 5.06E-06 |
| AC244102.4 | 7.87E-01 | 3.81E+00 | 2.28E+00 | 1.98E-10 | 1.75E-08 |
| AL031668.2 | 1.20E+00 | 2.51E+00 | 1.07E+00 | 1.05E-02 | 2.10E-02 |
| AL162573.1 | 7.79E-01 | 2.15E+00 | 1.47E+00 | 7.05E-08 | 1.38E-06 |

Tab. S6 Analysis table of differentially expressed genes between high and low riskscore groups.

| ONTOLOGY | ID | Description | GeneRatio | BgRatio | pvalue | p.adjust | qvalue | geneID | Count |
| --- | --- | --- | --- | --- | --- | --- | --- | --- | --- |
| BP | GO:0097529 | myeloid leukocyte migration | 29/499 | 241/18614 | 1.43E-11 | 4.38E-08 | 3.67E-08 | CCL26/DPEP1/TREM2/CHGA/PIK3CG/PF4V1/CALCA/CSF3R/TNFAIP6/IL1B/TNFRSF11A/XCL1/S100A8/SLIT2/CXCL13/SLAMF8/NBL1/FCER1G/ITGB2/S100A9/CXCL5/CXCL1/ROR2/CXCL8/PLA2G1B/CCL13/CSF1/HRH1/CD177 | 29 |
| BP | GO:1990266 | neutrophil migration | 21/499 | 128/18614 | 2.80E-11 | 4.38E-08 | 3.67E-08 | CCL26/DPEP1/PIK3CG/PF4V1/CSF3R/TNFAIP6/IL1B/XCL1/S100A8/SLIT2/CXCL13/SLAMF8/FCER1G/ITGB2/S100A9/CXCL5/CXCL1/CXCL8/PLA2G1B/CCL13/CD177 | 21 |
| BP | GO:0097530 | granulocyte migration | 23/499 | 156/18614 | 3.06E-11 | 4.38E-08 | 3.67E-08 | CCL26/DPEP1/PIK3CG/PF4V1/CSF3R/TNFAIP6/IL1B/XCL1/S100A8/SLIT2/CXCL13/SLAMF8/FCER1G/ITGB2/S100A9/CXCL5/CXCL1/CXCL8/PLA2G1B/CCL13/CSF1/HRH1/CD177 | 23 |
| BP | GO:0071621 | granulocyte chemotaxis | 21/499 | 131/18614 | 4.42E-11 | 4.75E-08 | 3.98E-08 | CCL26/DPEP1/PIK3CG/PF4V1/CSF3R/TNFAIP6/IL1B/XCL1/S100A8/SLIT2/CXCL13/FCER1G/ITGB2/S100A9/CXCL5/CXCL1/CXCL8/PLA2G1B/CCL13/CSF1/HRH1 | 21 |
| BP | GO:0030593 | neutrophil chemotaxis | 19/499 | 107/18614 | 5.99E-11 | 5.15E-08 | 4.31E-08 | CCL26/DPEP1/PIK3CG/PF4V1/CSF3R/TNFAIP6/IL1B/XCL1/S100A8/SLIT2/CXCL13/FCER1G/ITGB2/S100A9/CXCL5/CXCL1/CXCL8/PLA2G1B/CCL13 | 19 |
| BP | GO:0060326 | cell chemotaxis | 32/499 | 312/18614 | 8.74E-11 | 6.26E-08 | 5.25E-08 | CCL26/DPEP1/HGF/CHGA/PIK3CG/PF4V1/CALCA/LOX/CSF3R/TNFAIP6/IL1B/PDGFRA/TNFRSF11A/TRPM2/XCL1/S100A8/SLIT2/TPBG/CXCL13/SLAMF8/NBL1/FCER1G/ITGB2/S100A9/CXCL5/CXCL1/CXCL8/PLA2G1B/CCL13/CSF1/HRH1/LPAR1 | 32 |
| BP | GO:0050900 | leukocyte migration | 36/499 | 393/18614 | 1.42E-10 | 8.73E-08 | 7.31E-08 | ITGA3/CCL26/DPEP1/TREM2/CHGA/PIK3CG/PF4V1/CALCA/CSF3R/TNFAIP6/IL1B/FOXJ1/TNFRSF11A/TRPM2/XCL1/S100A8/SLIT2/CXCL13/SLAMF8/NBL1/FCER1G/ITGB2/S100A9/CXCL5/CXCL1/ROR2/CXCL8/PLA2G1B/CHST2/CCL13/CSF1/TNFRSF18/GCNT1/SELL/HRH1/CD177 | 36 |
| BP | GO:0030595 | leukocyte chemotaxis | 27/499 | 241/18614 | 3.74E-10 | 2.01E-07 | 1.68E-07 | CCL26/DPEP1/CHGA/PIK3CG/PF4V1/CALCA/CSF3R/TNFAIP6/IL1B/TNFRSF11A/TRPM2/XCL1/S100A8/SLIT2/CXCL13/SLAMF8/NBL1/FCER1G/ITGB2/S100A9/CXCL5/CXCL1/CXCL8/PLA2G1B/CCL13/CSF1/HRH1 | 27 |
| BP | GO:0007159 | leukocyte cell-cell adhesion | 34/499 | 415/18614 | 8.32E-09 | 3.97E-06 | 3.33E-06 | CD44/FCGR2B/ARG2/PTPRC/LAG3/CD209/TNFSF13B/IL4I1/APOA4/IL1B/FOXJ1/EPO/FCHO1/IL2RA/GPNMB/XCL1/ILDR2/S100A8/IL2RG/VSIG4/ITGB2/S100A9/IGF2/HAS2/IL20RB/CHST2/TIGIT/LILRB4/GCNT1/PLA2G2A/SELL/PDCD1LG2/CD177/HLA-DQA2 | 34 |
| BP | GO:0022407 | regulation of cell-cell adhesion | 35/499 | 491/18614 | 1.61E-07 | 6.94E-05 | 5.82E-05 | PLAUR/CD44/FCGR2B/ARG2/PTPRC/LAG3/CD209/TNFSF13B/IL4I1/IL1B/FOXJ1/EPO/FCHO1/IL2RA/SERPINE2/GPNMB/XCL1/ILDR2/IL2RG/VSIG4/CXCL13/ITGB2/PDPN/B4GALNT2/IGF2/HAS2/IL20RB/CHST2/TIGIT/EFNA5/LILRB4/GCNT1/PLA2G2A/PDCD1LG2/HLA-DQA2 | 35 |
| BP | GO:0000280 | nuclear division | 33/499 | 450/18614 | 1.92E-07 | 7.51E-05 | 6.29E-05 | CYP26B1/ANLN/TRIP13/RAD54L/BIRC5/KIF4A/MYBL2/CCNE1/NCAPG/TTK/CDC20/TEX11/NCAPH/KIF18A/EREG/IL1B/DLGAP5/CDCA8/KIF23/CENPE/KIF2C/MAEL/MKI67/MSX1/SGO2/KIF15/RPL10L/PLK1/IGF2/BUB1/PDE3A/SPHK1/CDCA2 | 33 |
| BP | GO:0006959 | humoral immune response | 23/499 | 250/18614 | 2.95E-07 | 0.00010568 | 8.86E-05 | PRSS3/SLC11A1/FCGR2B/PTPRC/TREM2/WFDC2/PF4V1/POU2AF1/REG1A/PI3/IL1B/FOXJ1/VSIG4/CXCL13/S100A9/CXCL5/CXCL1/CXCL8/PLA2G1B/C1QB/CCL13/DMBT1/PRSS2 | 23 |
| BP | GO:1903037 | regulation of leukocyte cell-cell adhesion | 29/499 | 378/18614 | 4.25E-07 | 0.000140338 | 0.000117643 | CD44/FCGR2B/ARG2/PTPRC/LAG3/CD209/TNFSF13B/IL4I1/IL1B/FOXJ1/EPO/FCHO1/IL2RA/GPNMB/XCL1/ILDR2/IL2RG/VSIG4/ITGB2/IGF2/HAS2/IL20RB/CHST2/TIGIT/LILRB4/GCNT1/PLA2G2A/PDCD1LG2/HLA-DQA2 | 29 |
| BP | GO:0002673 | regulation of acute inflammatory response | 10/499 | 48/18614 | 4.59E-07 | 0.000140928 | 0.000118138 | FCGR2B/OSM/PIK3CG/IL1B/ALOX5AP/TNFRSF11A/PTGES/FCGR1A/IL20RB/C2CD4A | 10 |
| BP | GO:0002274 | myeloid leukocyte activation | 22/499 | 240/18614 | 5.69E-07 | 0.000158869 | 0.000133177 | SLC11A1/FCGR2B/PTPRC/TREM2/CHGA/PIK3CG/CTSC/HAVCR1/PLA2G4A/VSIG4/BATF/FCER1G/ITGB2/CXCL8/ITGAM/TLR1/SPHK1/CSF1/LILRB4/PLA2G2A/FCGR3A/CD177 | 22 |
| BP | GO:0050672 | negative regulation of lymphocyte proliferation | 13/499 | 88/18614 | 6.06E-07 | 0.000158869 | 0.000133177 | FCGR2B/ARG2/IL4I1/FOXJ1/IL2RA/GPNMB/XCL1/VSIG4/MNDA/IL20RB/LILRB4/PLA2G2A/PDCD1LG2 | 13 |
| BP | GO:0048285 | organelle fission | 34/499 | 497/18614 | 6.30E-07 | 0.000158869 | 0.000133177 | CYP26B1/ANLN/TRIP13/RAD54L/BIRC5/KIF4A/DDHD1/MYBL2/CCNE1/NCAPG/TTK/CDC20/TEX11/NCAPH/KIF18A/EREG/IL1B/DLGAP5/CDCA8/KIF23/CENPE/KIF2C/MAEL/MKI67/MSX1/SGO2/KIF15/RPL10L/PLK1/IGF2/BUB1/PDE3A/SPHK1/CDCA2 | 34 |
| BP | GO:0032945 | negative regulation of mononuclear cell proliferation | 13/499 | 89/18614 | 6.93E-07 | 0.000158869 | 0.000133177 | FCGR2B/ARG2/IL4I1/FOXJ1/IL2RA/GPNMB/XCL1/VSIG4/MNDA/IL20RB/LILRB4/PLA2G2A/PDCD1LG2 | 13 |
| BP | GO:0032944 | regulation of mononuclear cell proliferation | 22/499 | 243/18614 | 7.02E-07 | 0.000158869 | 0.000133177 | CD38/FCGR2B/ARG2/PTPRC/CD209/TNFSF13B/IL4I1/IL1B/FOXJ1/EPO/IL2RA/GPNMB/XCL1/VSIG4/MNDA/IGF2/IL20RB/CSF1/LILRB4/PLA2G2A/PDCD1LG2/FCGR3A | 22 |
| BP | GO:0050866 | negative regulation of cell activation | 21/499 | 225/18614 | 7.64E-07 | 0.000164197 | 0.000137644 | FCGR2B/ARG2/PTPRC/LAG3/TREM2/IL4I1/FOXJ1/IL2RA/PDGFRA/SERPINE2/GPNMB/XCL1/ILDR2/SAMSN1/VSIG4/MNDA/IL20RB/TIGIT/LILRB4/PLA2G2A/PDCD1LG2 | 21 |
| BP | GO:0140014 | mitotic nuclear division | 24/499 | 286/18614 | 8.76E-07 | 0.000174718 | 0.000146463 | ANLN/TRIP13/BIRC5/KIF4A/MYBL2/NCAPG/TTK/CDC20/NCAPH/KIF18A/EREG/IL1B/DLGAP5/CDCA8/KIF23/CENPE/KIF2C/MKI67/KIF15/PLK1/IGF2/BUB1/SPHK1/CDCA2 | 24 |
| BP | GO:0050727 | regulation of inflammatory response | 30/499 | 414/18614 | 8.95E-07 | 0.000174718 | 0.000146463 | HGF/NLRP2/FCGR2B/PTPRC/TREM2/OSM/CCN4/PIK3CG/CTSC/TNFAIP6/IL1B/SMPDL3B/ALOX5AP/IL2RA/TNFRSF11A/SIGLEC10/XCL1/S100A8/PTGES/FCGR1A/NCF1/SLAMF8/S100A9/AIM2/IL20RB/SPHK1/MACIR/C1QTNF12/PLA2G2A/C2CD4A | 30 |
| BP | GO:0007162 | negative regulation of cell adhesion | 25/499 | 312/18614 | 1.22E-06 | 0.000227412 | 0.000190636 | FCGR2B/ARG2/PTPRC/LAG3/SEMA6A/CORO2B/IL4I1/FOXJ1/ADAMDEC1/IL2RA/SERPINE2/GPNMB/CYP1B1/XCL1/ILDR2/VSIG4/B4GALNT2/SEMA3E/IL20RB/TIGIT/EFNA5/LILRB4/PLA2G2A/PDCD1LG2/MMP12 | 25 |
| BP | GO:0050863 | regulation of T cell activation | 28/499 | 377/18614 | 1.28E-06 | 0.000229343 | 0.000192255 | CYP26B1/FCGR2B/ARG2/PTPRC/LAG3/CD209/TNFSF13B/IL4I1/IL1B/FOXJ1/EPO/FCHO1/IL2RA/GPNMB/XCL1/ILDR2/IL2RG/VSIG4/BATF/CGAS/IGF2/IL20RB/TIGIT/LILRB4/PLA2G2A/PDCD1LG2/TOX/HLA-DQA2 | 28 |
| BP | GO:0019730 | antimicrobial humoral response | 15/499 | 126/18614 | 1.44E-06 | 0.000248282 | 0.000208131 | PRSS3/SLC11A1/WFDC2/PF4V1/REG1A/PI3/CXCL13/S100A9/CXCL5/CXCL1/CXCL8/PLA2G1B/CCL13/DMBT1/PRSS2 | 15 |
| BP | GO:0070664 | negative regulation of leukocyte proliferation | 13/499 | 96/18614 | 1.68E-06 | 0.000277256 | 0.000232419 | FCGR2B/ARG2/IL4I1/FOXJ1/IL2RA/GPNMB/XCL1/VSIG4/MNDA/IL20RB/LILRB4/PLA2G2A/PDCD1LG2 | 13 |
| BP | GO:0051783 | regulation of nuclear division | 16/499 | 145/18614 | 1.80E-06 | 0.000286692 | 0.000240329 | TRIP13/BIRC5/TTK/CDC20/EREG/IL1B/DLGAP5/CDCA8/MKI67/MSX1/PLK1/IGF2/BUB1/PDE3A/SPHK1/CDCA2 | 16 |
| BP | GO:0050670 | regulation of lymphocyte proliferation | 21/499 | 239/18614 | 2.03E-06 | 0.000312208 | 0.000261718 | CD38/FCGR2B/ARG2/PTPRC/CD209/TNFSF13B/IL4I1/IL1B/FOXJ1/EPO/IL2RA/GPNMB/XCL1/VSIG4/MNDA/IGF2/IL20RB/LILRB4/PLA2G2A/PDCD1LG2/FCGR3A | 21 |
| BP | GO:0042445 | hormone metabolic process | 21/499 | 241/18614 | 2.32E-06 | 0.000328665 | 0.000275514 | CYP26B1/AKR1B1/IL4I1/GHRHR/MEP1A/STC2/SPP1/SCPEP1/PDGFRA/CYP1B1/CYP2C9/CRABP2/CTSK/REN/DAB2/CYP3A4/PCSK1/MBOAT4/AKR1B10/SELENOM/AKR1B15 | 21 |
| BP | GO:0050868 | negative regulation of T cell activation | 15/499 | 131/18614 | 2.37E-06 | 0.000328665 | 0.000275514 | FCGR2B/ARG2/LAG3/IL4I1/FOXJ1/IL2RA/GPNMB/XCL1/ILDR2/VSIG4/IL20RB/TIGIT/LILRB4/PLA2G2A/PDCD1LG2 | 15 |
| BP | GO:0051983 | regulation of chromosome segregation | 15/499 | 131/18614 | 2.37E-06 | 0.000328665 | 0.000275514 | TRIP13/BIRC5/CDC6/NCAPG/TTK/CDC20/NCAPH/DLGAP5/CDCA8/CENPE/KIF2C/MKI67/PLK1/BUB1/CDCA2 | 15 |
| BP | GO:0051250 | negative regulation of lymphocyte activation | 17/499 | 168/18614 | 2.88E-06 | 0.000386308 | 0.000323836 | FCGR2B/ARG2/LAG3/IL4I1/FOXJ1/IL2RA/GPNMB/XCL1/ILDR2/SAMSN1/VSIG4/MNDA/IL20RB/TIGIT/LILRB4/PLA2G2A/PDCD1LG2 | 17 |
| BP | GO:0007088 | regulation of mitotic nuclear division | 14/499 | 117/18614 | 3.04E-06 | 0.000395523 | 0.000331561 | TRIP13/BIRC5/TTK/CDC20/EREG/IL1B/DLGAP5/CDCA8/MKI67/PLK1/IGF2/BUB1/SPHK1/CDCA2 | 14 |
| BP | GO:0042130 | negative regulation of T cell proliferation | 11/499 | 72/18614 | 3.18E-06 | 0.000401602 | 0.000336657 | ARG2/IL4I1/FOXJ1/IL2RA/GPNMB/XCL1/VSIG4/IL20RB/LILRB4/PLA2G2A/PDCD1LG2 | 11 |
| BP | GO:0001819 | positive regulation of cytokine production | 32/499 | 489/18614 | 3.47E-06 | 0.000425999 | 0.000357108 | NOX1/SLC11A1/HGF/NLRP2/PTPRC/TREM2/OSM/PIK3CG/POU2AF1/EREG/IL1B/HILPDA/CYP1B1/XCL1/BATF/FCER1G/MNDA/AIM2/CGAS/CYBB/CLEC4E/PLA2G1B/IL17D/HPSE/TLR1/IL20RB/SPHK1/TIGIT/FCGR3A/TRIM16/MMP12/CEACAM20 | 32 |
| BP | GO:0070663 | regulation of leukocyte proliferation | 22/499 | 268/18614 | 3.58E-06 | 0.000427442 | 0.000358318 | CD38/FCGR2B/ARG2/PTPRC/CD209/TNFSF13B/IL4I1/IL1B/FOXJ1/EPO/IL2RA/GPNMB/XCL1/VSIG4/MNDA/IGF2/IL20RB/CSF1/LILRB4/PLA2G2A/PDCD1LG2/FCGR3A | 22 |
| BP | GO:0019221 | cytokine-mediated signaling pathway | 32/499 | 492/18614 | 3.94E-06 | 0.000457799 | 0.000383766 | CCL26/CD44/PTPRC/MT3/TREM2/OSM/IL2RB/BIRC7/TNFSF13B/PF4V1/CSF3R/EREG/IL1B/EPO/IL2RA/TNFRSF11A/XCL1/SLIT2/IL2RG/CXCL13/FCER1G/TFF2/AIM2/CXCL5/CXCL1/CXCL8/SPHK1/CCL13/CSF1/LILRB4/TNFRSF18/MMP12 | 32 |
| BP | GO:0032943 | mononuclear cell proliferation | 24/499 | 313/18614 | 4.27E-06 | 0.000482454 | 0.000404434 | CD38/SLC11A1/FCGR2B/ARG2/PTPRC/CD209/TNFSF13B/IL4I1/PIK3CG/IL1B/FOXJ1/EPO/IL2RA/GPNMB/XCL1/VSIG4/MNDA/IGF2/IL20RB/CSF1/LILRB4/PLA2G2A/PDCD1LG2/FCGR3A | 24 |
| BP | GO:0042098 | T cell proliferation | 19/499 | 213/18614 | 4.99E-06 | 0.000549674 | 0.000460783 | SLC11A1/ARG2/PTPRC/CD209/TNFSF13B/IL4I1/PIK3CG/IL1B/FOXJ1/EPO/IL2RA/GPNMB/XCL1/VSIG4/IGF2/IL20RB/LILRB4/PLA2G2A/PDCD1LG2 | 19 |
| BP | GO:0002675 | positive regulation of acute inflammatory response | 7/499 | 28/18614 | 6.93E-06 | 0.000744174 | 0.000623829 | OSM/PIK3CG/IL1B/ALOX5AP/TNFRSF11A/FCGR1A/C2CD4A | 7 |
| BP | GO:0045730 | respiratory burst | 8/499 | 39/18614 | 7.46E-06 | 0.000782318 | 0.000655805 | NOX1/SLC11A1/TREM2/PIK3CG/NCF2/NCF1/SLAMF8/CYBB | 8 |
| BP | GO:0070661 | leukocyte proliferation | 25/499 | 348/18614 | 8.48E-06 | 0.000867492 | 0.000727204 | CD38/SLC11A1/FCGR2B/ARG2/PTPRC/CD209/TREM2/TNFSF13B/IL4I1/PIK3CG/IL1B/FOXJ1/EPO/IL2RA/GPNMB/XCL1/VSIG4/MNDA/IGF2/IL20RB/CSF1/LILRB4/PLA2G2A/PDCD1LG2/FCGR3A | 25 |
| BP | GO:0002695 | negative regulation of leukocyte activation | 18/499 | 202/18614 | 8.95E-06 | 0.000892371 | 0.00074806 | FCGR2B/ARG2/PTPRC/LAG3/IL4I1/FOXJ1/IL2RA/GPNMB/XCL1/ILDR2/SAMSN1/VSIG4/MNDA/IL20RB/TIGIT/LILRB4/PLA2G2A/PDCD1LG2 | 18 |
| BP | GO:0042129 | regulation of T cell proliferation | 17/499 | 183/18614 | 9.14E-06 | 0.000892371 | 0.00074806 | ARG2/PTPRC/CD209/TNFSF13B/IL4I1/IL1B/FOXJ1/EPO/IL2RA/GPNMB/XCL1/VSIG4/IGF2/IL20RB/LILRB4/PLA2G2A/PDCD1LG2 | 17 |
| BP | GO:0046651 | lymphocyte proliferation | 23/499 | 306/18614 | 9.35E-06 | 0.000893148 | 0.000748712 | CD38/SLC11A1/FCGR2B/ARG2/PTPRC/CD209/TNFSF13B/IL4I1/PIK3CG/IL1B/FOXJ1/EPO/IL2RA/GPNMB/XCL1/VSIG4/MNDA/IGF2/IL20RB/LILRB4/PLA2G2A/PDCD1LG2/FCGR3A | 23 |
| BP | GO:0046942 | carboxylic acid transport | 25/499 | 352/18614 | 1.03E-05 | 0.000964274 | 0.000808336 | SLC11A1/SLC7A8/SLC1A5/SLCO1B3/PLA2G4A/RGS2/RGS4/SLC2A1/IL1B/SLC6A6/SLC16A3/TNFRSF11A/CRABP2/PTGES/SLC7A7/SLC13A3/SV2A/SLC16A14/FABP7/FABP5/FABP6/EMB/PLA2G1B/SLC16A11/PLA2G2A | 25 |
| BP | GO:0015849 | organic acid transport | 25/499 | 353/18614 | 1.08E-05 | 0.000990799 | 0.000830571 | SLC11A1/SLC7A8/SLC1A5/SLCO1B3/PLA2G4A/RGS2/RGS4/SLC2A1/IL1B/SLC6A6/SLC16A3/TNFRSF11A/CRABP2/PTGES/SLC7A7/SLC13A3/SV2A/SLC16A14/FABP7/FABP5/FABP6/EMB/PLA2G1B/SLC16A11/PLA2G2A | 25 |
| BP | GO:0002526 | acute inflammatory response | 13/499 | 114/18614 | 1.16E-05 | 0.00104041 | 0.000872159 | FCGR2B/OSM/PIK3CG/IL1B/EPO/ALOX5AP/TNFRSF11A/S100A8/PTGES/FCGR1A/IL20RB/C2CD4A/FCGR3A | 13 |
| BP | GO:1903038 | negative regulation of leukocyte cell-cell adhesion | 15/499 | 150/18614 | 1.27E-05 | 0.001110597 | 0.000930995 | FCGR2B/ARG2/LAG3/IL4I1/FOXJ1/IL2RA/GPNMB/XCL1/ILDR2/VSIG4/IL20RB/TIGIT/LILRB4/PLA2G2A/PDCD1LG2 | 15 |
| BP | GO:1990868 | response to chemokine | 12/499 | 99/18614 | 1.35E-05 | 0.001133576 | 0.000950258 | CCL26/TREM2/PF4V1/LOX/XCL1/SLIT2/CXCL13/TFF2/CXCL5/CXCL1/CXCL8/CCL13 | 12 |
| BP | GO:1990869 | cellular response to chemokine | 12/499 | 99/18614 | 1.35E-05 | 0.001133576 | 0.000950258 | CCL26/TREM2/PF4V1/LOX/XCL1/SLIT2/CXCL13/TFF2/CXCL5/CXCL1/CXCL8/CCL13 | 12 |
| BP | GO:0070486 | leukocyte aggregation | 5/499 | 13/18614 | 1.46E-05 | 0.001207795 | 0.001012475 | CD44/IL1B/S100A8/S100A9/HAS2 | 5 |
| BP | GO:0045785 | positive regulation of cell adhesion | 30/499 | 482/18614 | 1.85E-05 | 0.001496017 | 0.001254086 | ITGA3/PLAUR/CD44/PTPRC/CD209/TNFSF13B/OLFM4/IL4I1/AGR2/CSPG5/IL1B/EPO/FCHO1/IL2RA/XCL1/IL2RG/DAB2/CXCL13/ITGB2/PDPN/IGF2/HAS2/CHST2/CSF1/LILRB4/TNFRSF18/GCNT1/PDCD1LG2/HLA-DQA2/PRSS2 | 30 |
| BP | GO:1903046 | meiotic cell cycle process | 18/499 | 215/18614 | 2.10E-05 | 0.001667963 | 0.001398226 | CYP26B1/TRIP13/RAD54L/CCNE1/TTK/CDC20/TEX11/NCAPH/KIF18A/EREG/MAEL/MSX1/SGO2/CDC25A/RPL10L/PLK1/BUB1/PDE3A | 18 |
| BP | GO:0010466 | negative regulation of peptidase activity | 19/499 | 236/18614 | 2.16E-05 | 0.001684603 | 0.001412176 | PLAUR/DPEP1/HGF/CD44/LAMP3/MT3/BIRC5/PAPLN/BIRC7/WFDC2/RENBP/SLCO1B3/PI3/SERPINE2/PI15/CD109/SFN/SPOCK3/MAGEA3 | 19 |
| BP | GO:0140013 | meiotic nuclear division | 17/499 | 196/18614 | 2.25E-05 | 0.001723778 | 0.001445015 | CYP26B1/TRIP13/RAD54L/CCNE1/TTK/CDC20/TEX11/NCAPH/KIF18A/EREG/MAEL/MSX1/SGO2/RPL10L/PLK1/BUB1/PDE3A | 17 |
| BP | GO:0015718 | monocarboxylic acid transport | 16/499 | 177/18614 | 2.34E-05 | 0.001766217 | 0.001480591 | SLCO1B3/PLA2G4A/SLC2A1/IL1B/SLC16A3/TNFRSF11A/CRABP2/PTGES/SLC16A14/FABP7/FABP5/FABP6/EMB/PLA2G1B/SLC16A11/PLA2G2A | 16 |
| BP | GO:1905818 | regulation of chromosome separation | 10/499 | 73/18614 | 2.40E-05 | 0.001774701 | 0.001487703 | TRIP13/BIRC5/NCAPG/TTK/CDC20/NCAPH/DLGAP5/CDCA8/PLK1/BUB1 | 10 |
| BP | GO:0006801 | superoxide metabolic process | 10/499 | 74/18614 | 2.70E-05 | 0.001956501 | 0.001640103 | NOX1/MT3/APOA4/NCF2/NCF1/ITGB2/CYBB/ITGAM/NQO1/CD177 | 10 |
| BP | GO:0000070 | mitotic sister chromatid segregation | 17/499 | 199/18614 | 2.73E-05 | 0.001956501 | 0.001640103 | TRIP13/BIRC5/KIF4A/MYBL2/NCAPG/TTK/CDC20/NCAPH/KIF18A/DLGAP5/CDCA8/KIF23/CENPE/KIF2C/KIF15/PLK1/BUB1 | 17 |
| BP | GO:0070098 | chemokine-mediated signaling pathway | 11/499 | 91/18614 | 3.15E-05 | 0.00219085 | 0.001836554 | CCL26/TREM2/PF4V1/XCL1/SLIT2/CXCL13/TFF2/CXCL5/CXCL1/CXCL8/CCL13 | 11 |
| BP | GO:0140353 | lipid export from cell | 8/499 | 47/18614 | 3.16E-05 | 0.00219085 | 0.001836554 | PLA2G4A/SPP1/IL1B/TNFRSF11A/REN/PTGES/DAB2/SELENOM | 8 |
| BP | GO:1902563 | regulation of neutrophil activation | 5/499 | 15/18614 | 3.26E-05 | 0.002224868 | 0.001865071 | FCGR2B/ITGB2/ITGAM/PLA2G2A/CD177 | 5 |
| BP | GO:0002443 | leukocyte mediated immunity | 26/499 | 401/18614 | 3.35E-05 | 0.002237523 | 0.001875679 | SLAMF7/FCGR2B/PTPRC/LAG3/TREM2/IL2RB/CHGA/IL4I1/PIK3CG/CTSC/IL1B/FOXJ1/ULBP2/XCL1/FCGR1A/BATF/FCER1G/ITGB2/ITGAM/PLA2G1B/C1QB/IL20RB/LILRB4/FCGR3A/CD177/HLA-DQA2 | 26 |
| BP | GO:0052547 | regulation of peptidase activity | 27/499 | 425/18614 | 3.38E-05 | 0.002237523 | 0.001875679 | PLAUR/DPEP1/HGF/NLRP2/CD44/LAMP3/MT3/BIRC5/PAPLN/BIRC7/WFDC2/RENBP/SLCO1B3/FASLG/PI3/EGLN3/SERPINE2/PI15/PMAIP1/CTSK/S100A8/CD109/S100A9/AIM2/SFN/SPOCK3/MAGEA3 | 27 |
| BP | GO:0042116 | macrophage activation | 12/499 | 109/18614 | 3.58E-05 | 0.002331516 | 0.001954472 | SLC11A1/FCGR2B/PTPRC/TREM2/CTSC/PLA2G4A/VSIG4/ITGB2/ITGAM/TLR1/SPHK1/FCGR3A | 12 |
| BP | GO:0002460 | adaptive immune response based on somatic recombination of immune receptors built from immunoglobulin superfamily domains | 22/499 | 311/18614 | 3.70E-05 | 0.002371964 | 0.001988379 | SLC11A1/FCGR2B/PTPRC/TREM2/IL2RB/TNFSF13B/IL4I1/CTSC/PLA2G4A/IL1B/FOXJ1/ULBP2/XCL1/FCGR1A/BATF/CXCL13/FCER1G/C1QB/IL20RB/LILRB4/FCGR3A/HLA-DQA2 | 22 |
| BP | GO:0010975 | regulation of neuron projection development | 28/499 | 452/18614 | 3.80E-05 | 0.002403124 | 0.0020145 | CD38/ITGA3/CNTN1/HGF/CTNNA2/MT3/NRCAM/SEMA6A/PRRX1/RGS2/CDC20/SPP1/CHN1/EPO/TUBB2B/CRABP2/SLIT2/DAB2/CHODL/FZD1/S100A9/ROR2/SEMA3E/EFNA5/TRPV2/KEL/LPAR1/TOX | 28 |
| BP | GO:0022408 | negative regulation of cell-cell adhesion | 17/499 | 205/18614 | 3.99E-05 | 0.002484902 | 0.002083053 | FCGR2B/ARG2/LAG3/IL4I1/FOXJ1/IL2RA/SERPINE2/GPNMB/XCL1/ILDR2/VSIG4/B4GALNT2/IL20RB/TIGIT/LILRB4/PLA2G2A/PDCD1LG2 | 17 |
| BP | GO:0043154 | negative regulation of cysteine-type endopeptidase activity involved in apoptotic process | 10/499 | 78/18614 | 4.30E-05 | 0.00264261 | 0.002215257 | PLAUR/DPEP1/HGF/CD44/LAMP3/MT3/BIRC5/BIRC7/SFN/MAGEA3 | 10 |
| BP | GO:0000819 | sister chromatid segregation | 19/499 | 250/18614 | 4.76E-05 | 0.002872134 | 0.002407664 | TRIP13/BIRC5/KIF4A/CDC6/MYBL2/NCAPG/TTK/CDC20/NCAPH/KIF18A/DLGAP5/CDCA8/KIF23/CENPE/KIF2C/SGO2/KIF15/PLK1/BUB1 | 19 |
| BP | GO:0051304 | chromosome separation | 10/499 | 79/18614 | 4.81E-05 | 0.002872134 | 0.002407664 | TRIP13/BIRC5/NCAPG/TTK/CDC20/NCAPH/DLGAP5/CDCA8/PLK1/BUB1 | 10 |
| BP | GO:0022409 | positive regulation of cell-cell adhesion | 22/499 | 321/18614 | 5.94E-05 | 0.003494525 | 0.002929403 | PLAUR/CD44/PTPRC/CD209/TNFSF13B/IL4I1/IL1B/EPO/FCHO1/IL2RA/XCL1/IL2RG/CXCL13/ITGB2/PDPN/IGF2/HAS2/CHST2/LILRB4/GCNT1/PDCD1LG2/HLA-DQA2 | 22 |
| BP | GO:0009410 | response to xenobiotic stimulus | 27/499 | 440/18614 | 6.13E-05 | 0.003558172 | 0.002982757 | CYP26B1/CD38/ITGA3/DPEP1/KCNH2/OXCT1/RAD54L/SMOX/CA9/ENO2/SLCO1B3/LOX/IL1B/CYP1B1/CYP2C9/REN/CRHBP/UCHL1/FZD1/CYP3A4/AIM2/CYBB/PDE3A/PCSK1/NQO1/UGT1A10/CSAG3 | 27 |
| BP | GO:0002710 | negative regulation of T cell mediated immunity | 6/499 | 27/18614 | 6.60E-05 | 0.003781635 | 0.003170083 | FCGR2B/PTPRC/IL4I1/XCL1/IL20RB/LILRB4 | 6 |
| BP | GO:0050867 | positive regulation of cell activation | 25/499 | 394/18614 | 6.71E-05 | 0.003792494 | 0.003179186 | CD38/PTPRC/CD209/TREM2/TNFSF13B/IL4I1/CTSC/HAVCR1/PLEK/PLA2G4A/IL1B/EPO/FCHO1/IL2RA/XCL1/IL2RG/ITGB2/IGF2/ITGAM/LILRB4/PDCD1LG2/TOX/FCGR3A/CD177/HLA-DQA2 | 25 |
| BP | GO:0050729 | positive regulation of inflammatory response | 14/499 | 154/18614 | 7.06E-05 | 0.00393712 | 0.003300423 | TREM2/OSM/CCN4/PIK3CG/CTSC/IL1B/ALOX5AP/TNFRSF11A/S100A8/FCGR1A/S100A9/AIM2/PLA2G2A/C2CD4A | 14 |
| BP | GO:0043410 | positive regulation of MAPK cascade | 29/499 | 495/18614 | 7.53E-05 | 0.004146956 | 0.003476326 | CCL26/NOX1/HGF/CD44/FCGR2B/PTPRC/MT3/IL11/TREM2/OSM/BIRC7/PIK3CG/IL1B/EPO/PDGFRA/GPNMB/TNFRSF11A/XCL1/TPBG/NCF1/IGF2/ROR2/PLA2G1B/P2RY6/SPHK1/CCL13/TNFAIP8L3/PLA2G2A/LPAR1 | 29 |
| BP | GO:0032102 | negative regulation of response to external stimulus | 27/499 | 446/18614 | 7.70E-05 | 0.004186428 | 0.003509414 | PLAUR/HGF/CTNNA2/FCGR2B/ARG2/PTPRC/SEMA6A/TREM2/SPP1/PLAU/TNFAIP6/SMPDL3B/IL2RA/PDGFRA/SERPINE2/SIGLEC10/SLIT2/VSIG4/CXCL13/CD109/SLAMF8/NBL1/SEMA3E/IL20RB/MACIR/C1QTNF12/MMP12 | 27 |
| BP | GO:0032703 | negative regulation of interleukin-2 production | 6/499 | 28/18614 | 8.21E-05 | 0.0044107 | 0.003697418 | PTPRC/LAG3/XCL1/VSIG4/IL20RB/LILRB4 | 6 |
| BP | GO:0002696 | positive regulation of leukocyte activation | 24/499 | 377/18614 | 8.88E-05 | 0.004711447 | 0.003949529 | CD38/PTPRC/CD209/TREM2/TNFSF13B/IL4I1/CTSC/HAVCR1/PLA2G4A/IL1B/EPO/FCHO1/IL2RA/XCL1/IL2RG/ITGB2/IGF2/ITGAM/LILRB4/PDCD1LG2/TOX/FCGR3A/CD177/HLA-DQA2 | 24 |
| BP | GO:0050731 | positive regulation of peptidyl-tyrosine phosphorylation | 15/499 | 181/18614 | 0.000112952 | 0.005836717 | 0.004892825 | CNTN1/HGF/CD44/PTPRC/IL11/TREM2/OSM/AREG/EREG/EPO/FCGR1A/NCF1/IGF2/EFNA5/TNFRSF18 | 15 |
| BP | GO:1902850 | microtubule cytoskeleton organization involved in mitosis | 14/499 | 161/18614 | 0.000113942 | 0.005836717 | 0.004892825 | WDR62/BIRC5/KIF4A/MYBL2/TTK/CENPA/CDC20/DLGAP5/CDCA8/KIF23/CENPE/KIF15/PLK1/SAPCD2 | 14 |
| BP | GO:0042119 | neutrophil activation | 7/499 | 42/18614 | 0.000114099 | 0.005836717 | 0.004892825 | FCGR2B/FCER1G/ITGB2/CXCL8/ITGAM/PLA2G2A/CD177 | 7 |
| BP | GO:0015711 | organic anion transport | 26/499 | 433/18614 | 0.000118731 | 0.006002177 | 0.005031527 | SLC11A1/SLC25A24/SLC7A8/SLC1A5/SLCO1B3/PLA2G4A/RGS2/RGS4/SLC2A1/IL1B/SLC6A6/SLC16A3/TNFRSF11A/CRABP2/PTGES/SLC7A7/SLC13A3/SV2A/SLC16A14/FABP7/FABP5/FABP6/EMB/PLA2G1B/SLC16A11/PLA2G2A | 26 |
| BP | GO:0043281 | regulation of cysteine-type endopeptidase activity involved in apoptotic process | 16/499 | 204/18614 | 0.000128964 | 0.006443691 | 0.005401642 | PLAUR/DPEP1/HGF/NLRP2/CD44/LAMP3/MT3/BIRC5/BIRC7/FASLG/EGLN3/PMAIP1/S100A8/S100A9/SFN/MAGEA3 | 16 |
| BP | GO:0098813 | nuclear chromosome segregation | 22/499 | 339/18614 | 0.000131527 | 0.006496247 | 0.005445698 | TRIP13/BIRC5/KIF4A/CDC6/MYBL2/CCNE1/NCAPG/TTK/CDC20/TEX11/NCAPH/KIF18A/DLGAP5/CDCA8/KIF23/CENPE/KIF2C/MAEL/SGO2/KIF15/PLK1/BUB1 | 22 |
| BP | GO:0042554 | superoxide anion generation | 7/499 | 43/18614 | 0.000133171 | 0.006502699 | 0.005451107 | NOX1/NCF2/NCF1/ITGB2/CYBB/ITGAM/CD177 | 7 |
| BP | GO:0002819 | regulation of adaptive immune response | 16/499 | 205/18614 | 0.000136503 | 0.006590509 | 0.005524716 | SLC11A1/FCGR2B/PTPRC/TREM2/TNFSF13B/IL4I1/PLA2G4A/IL1B/FOXJ1/ULBP2/XCL1/FCGR1A/SAMSN1/BATF/IL20RB/LILRB4 | 16 |
| BP | GO:0050766 | positive regulation of phagocytosis | 9/499 | 73/18614 | 0.000140822 | 0.00672347 | 0.005636175 | SLC11A1/FCGR2B/PTPRC/TREM2/IL2RB/IL1B/IL2RG/FCGR1A/FCER1G | 9 |
| BP | GO:0051256 | mitotic spindle midzone assembly | 4/499 | 11/18614 | 0.00014496 | 0.006844977 | 0.005738033 | BIRC5/KIF4A/CDCA8/KIF23 | 4 |
| BP | GO:0010965 | regulation of mitotic sister chromatid separation | 8/499 | 58/18614 | 0.000148892 | 0.006954229 | 0.005829617 | TRIP13/BIRC5/TTK/CDC20/DLGAP5/CDCA8/PLK1/BUB1 | 8 |
| BP | GO:1903039 | positive regulation of leukocyte cell-cell adhesion | 19/499 | 273/18614 | 0.000152986 | 0.007068634 | 0.005925521 | CD44/PTPRC/CD209/TNFSF13B/IL4I1/IL1B/EPO/FCHO1/IL2RA/XCL1/IL2RG/ITGB2/IGF2/HAS2/CHST2/LILRB4/GCNT1/PDCD1LG2/HLA-DQA2 | 19 |
| BP | GO:0030071 | regulation of mitotic metaphase/anaphase transition | 10/499 | 91/18614 | 0.000161259 | 0.007293984 | 0.006114428 | TRIP13/BIRC5/CDC6/TTK/CDC20/DLGAP5/CDCA8/CENPE/PLK1/BUB1 | 10 |
| BP | GO:2000117 | negative regulation of cysteine-type endopeptidase activity | 10/499 | 91/18614 | 0.000161259 | 0.007293984 | 0.006114428 | PLAUR/DPEP1/HGF/CD44/LAMP3/MT3/BIRC5/BIRC7/SFN/MAGEA3 | 10 |
| BP | GO:0051346 | negative regulation of hydrolase activity | 22/499 | 345/18614 | 0.000168914 | 0.007560673 | 0.006337989 | PLAUR/DPEP1/HGF/CD44/LAMP3/MT3/BIRC5/PAPLN/BIRC7/WFDC2/RENBP/SLCO1B3/RGS2/PI3/PPP1R1B/SERPINE2/PI15/CD109/PPP1R14D/SFN/SPOCK3/MAGEA3 | 22 |
| BP | GO:0071466 | cellular response to xenobiotic stimulus | 15/499 | 189/18614 | 0.000182478 | 0.008082011 | 0.006775019 | CYP26B1/DPEP1/KCNH2/SMOX/SLCO1B3/IL1B/CYP1B1/CYP2C9/REN/CRHBP/UCHL1/CYP3A4/AIM2/NQO1/UGT1A10 | 15 |
| BP | GO:0002449 | lymphocyte mediated immunity | 20/499 | 300/18614 | 0.000184323 | 0.008082011 | 0.006775019 | SLAMF7/FCGR2B/PTPRC/LAG3/TREM2/IL2RB/IL4I1/CTSC/IL1B/FOXJ1/ULBP2/XCL1/FCGR1A/BATF/FCER1G/C1QB/IL20RB/LILRB4/FCGR3A/HLA-DQA2 | 20 |
| BP | GO:0050730 | regulation of peptidyl-tyrosine phosphorylation | 18/499 | 255/18614 | 0.000190266 | 0.008258317 | 0.006922813 | CNTN1/HGF/CD44/PTPRC/IL11/TREM2/OSM/AREG/EREG/EPO/FCGR1A/SAMSN1/NCF1/ITGB2/IGF2/EFNA5/LILRB4/TNFRSF18 | 18 |
| BP | GO:0002822 | regulation of adaptive immune response based on somatic recombination of immune receptors built from immunoglobulin superfamily domains | 15/499 | 190/18614 | 0.000193351 | 0.008308295 | 0.006964709 | SLC11A1/FCGR2B/PTPRC/TREM2/TNFSF13B/IL4I1/PLA2G4A/IL1B/FOXJ1/ULBP2/XCL1/FCGR1A/BATF/IL20RB/LILRB4 | 15 |
| BP | GO:0007052 | mitotic spindle organization | 12/499 | 130/18614 | 0.000198441 | 0.008317365 | 0.006972312 | WDR62/BIRC5/KIF4A/MYBL2/TTK/CDC20/DLGAP5/CDCA8/KIF23/CENPE/KIF15/PLK1 | 12 |
| BP | GO:2000116 | regulation of cysteine-type endopeptidase activity | 17/499 | 234/18614 | 0.000202625 | 0.008317365 | 0.006972312 | PLAUR/DPEP1/HGF/NLRP2/CD44/LAMP3/MT3/BIRC5/BIRC7/FASLG/EGLN3/PMAIP1/S100A8/S100A9/AIM2/SFN/MAGEA3 | 17 |
| BP | GO:0007094 | mitotic spindle assembly checkpoint signaling | 7/499 | 46/18614 | 0.000206393 | 0.008317365 | 0.006972312 | TRIP13/BIRC5/TTK/CDC20/CDCA8/PLK1/BUB1 | 7 |
| BP | GO:0071173 | spindle assembly checkpoint signaling | 7/499 | 46/18614 | 0.000206393 | 0.008317365 | 0.006972312 | TRIP13/BIRC5/TTK/CDC20/CDCA8/PLK1/BUB1 | 7 |
| BP | GO:0071174 | mitotic spindle checkpoint signaling | 7/499 | 46/18614 | 0.000206393 | 0.008317365 | 0.006972312 | TRIP13/BIRC5/TTK/CDC20/CDCA8/PLK1/BUB1 | 7 |
| BP | GO:1902099 | regulation of metaphase/anaphase transition of cell cycle | 10/499 | 94/18614 | 0.000211219 | 0.008317365 | 0.006972312 | TRIP13/BIRC5/CDC6/TTK/CDC20/DLGAP5/CDCA8/CENPE/PLK1/BUB1 | 10 |
| BP | GO:0000022 | mitotic spindle elongation | 4/499 | 12/18614 | 0.000212841 | 0.008317365 | 0.006972312 | BIRC5/KIF4A/CDCA8/KIF23 | 4 |
| BP | GO:0002820 | negative regulation of adaptive immune response | 8/499 | 61/18614 | 0.000213247 | 0.008317365 | 0.006972312 | FCGR2B/PTPRC/IL4I1/FOXJ1/XCL1/SAMSN1/IL20RB/LILRB4 | 8 |
| BP | GO:0046456 | icosanoid biosynthetic process | 8/499 | 61/18614 | 0.000213247 | 0.008317365 | 0.006972312 | PTGS1/PLA2G4A/IL1B/ALOX5AP/CYP2C9/PTGES/FABP5/PLA2G1B | 8 |
| BP | GO:0051306 | mitotic sister chromatid separation | 8/499 | 61/18614 | 0.000213247 | 0.008317365 | 0.006972312 | TRIP13/BIRC5/TTK/CDC20/DLGAP5/CDCA8/PLK1/BUB1 | 8 |
| BP | GO:0038094 | Fc-gamma receptor signaling pathway | 6/499 | 33/18614 | 0.000215497 | 0.008317365 | 0.006972312 | FCGR2B/PTPRC/FCGR1A/FCER1G/CLEC4E/FCGR3A | 6 |
| BP | GO:0055001 | muscle cell development | 15/499 | 192/18614 | 0.00021679 | 0.008317365 | 0.006972312 | NEBL/TNNT1/CNTNAP1/MYH3/LOX/RGS2/ACTL8/RGS4/FLNC/MYO18B/FHOD3/PDGFRA/UCHL1/G6PD/KEL | 15 |
| BP | GO:0006909 | phagocytosis | 17/499 | 236/18614 | 0.000224134 | 0.008523024 | 0.007144712 | SLC11A1/FCGR2B/PTPRC/TREM2/IL2RB/HAVCR1/NCF2/IL1B/GULP1/IL2RG/FCGR1A/COLEC12/FCER1G/ITGB2/ITGAM/P2RY6/SPHK1 | 17 |
| BP | GO:0007091 | metaphase/anaphase transition of mitotic cell cycle | 10/499 | 95/18614 | 0.000230517 | 0.008688879 | 0.007283746 | TRIP13/BIRC5/CDC6/TTK/CDC20/DLGAP5/CDCA8/CENPE/PLK1/BUB1 | 10 |
| BP | GO:0002920 | regulation of humoral immune response | 7/499 | 47/18614 | 0.00023698 | 0.00877848 | 0.007358857 | FCGR2B/PTPRC/TREM2/IL1B/FOXJ1/VSIG4/CXCL13 | 7 |
| BP | GO:0031577 | spindle checkpoint signaling | 7/499 | 47/18614 | 0.00023698 | 0.00877848 | 0.007358857 | TRIP13/BIRC5/TTK/CDC20/CDCA8/PLK1/BUB1 | 7 |
| BP | GO:0045861 | negative regulation of proteolysis | 21/499 | 330/18614 | 0.000242749 | 0.008915305 | 0.007473555 | PLAUR/DPEP1/HGF/CD44/LAMP3/MT3/BIRC5/PAPLN/BIRC7/WFDC2/RENBP/SLCO1B3/PLAU/PI3/SERPINE2/PI15/CD109/TM4SF20/SFN/SPOCK3/MAGEA3 | 21 |
| BP | GO:0030277 | maintenance of gastrointestinal epithelium | 5/499 | 22/18614 | 0.0002449 | 0.008918079 | 0.00747588 | VSIG1/TFF2/TFF1/MUC13/MUC6 | 5 |
| BP | GO:0001503 | ossification | 25/499 | 429/18614 | 0.000252469 | 0.009116474 | 0.007642192 | MRC2/HGF/VCAN/COL11A1/PTHLH/CHRDL1/CCN4/CLEC11A/AREG/CALCA/LOX/SPP1/TNFAIP6/CDH11/TNFRSF11A/CTSK/FZD1/CREB3L1/RANBP3L/OSR2/CTHRC1/IGF2/ROR2/SIX2/CSF1 | 25 |
| BP | GO:0033046 | negative regulation of sister chromatid segregation | 7/499 | 48/18614 | 0.000271114 | 0.009394976 | 0.007875656 | TRIP13/BIRC5/TTK/CDC20/CDCA8/PLK1/BUB1 | 7 |
| BP | GO:0033048 | negative regulation of mitotic sister chromatid segregation | 7/499 | 48/18614 | 0.000271114 | 0.009394976 | 0.007875656 | TRIP13/BIRC5/TTK/CDC20/CDCA8/PLK1/BUB1 | 7 |
| BP | GO:0036230 | granulocyte activation | 7/499 | 48/18614 | 0.000271114 | 0.009394976 | 0.007875656 | FCGR2B/FCER1G/ITGB2/CXCL8/ITGAM/PLA2G2A/CD177 | 7 |
| BP | GO:0045841 | negative regulation of mitotic metaphase/anaphase transition | 7/499 | 48/18614 | 0.000271114 | 0.009394976 | 0.007875656 | TRIP13/BIRC5/TTK/CDC20/CDCA8/PLK1/BUB1 | 7 |
| BP | GO:2000816 | negative regulation of mitotic sister chromatid separation | 7/499 | 48/18614 | 0.000271114 | 0.009394976 | 0.007875656 | TRIP13/BIRC5/TTK/CDC20/CDCA8/PLK1/BUB1 | 7 |
| BP | GO:0015908 | fatty acid transport | 11/499 | 116/18614 | 0.000287058 | 0.009867896 | 0.008272097 | PLA2G4A/SLC2A1/IL1B/TNFRSF11A/CRABP2/PTGES/FABP7/FABP5/FABP6/PLA2G1B/PLA2G2A | 11 |
| BP | GO:0044784 | metaphase/anaphase transition of cell cycle | 10/499 | 98/18614 | 0.000297498 | 0.010145616 | 0.008504905 | TRIP13/BIRC5/CDC6/TTK/CDC20/DLGAP5/CDCA8/CENPE/PLK1/BUB1 | 10 |
| BP | GO:0002524 | hypersensitivity | 4/499 | 13/18614 | 0.000300941 | 0.010182249 | 0.008535614 | FCGR2B/FCGR1A/IL20RB/FCGR3A | 4 |
| BP | GO:0006911 | phagocytosis, engulfment | 7/499 | 49/18614 | 0.00030909 | 0.010362045 | 0.008686334 | FCGR2B/TREM2/HAVCR1/GULP1/FCGR1A/ITGB2/ITGAM | 7 |
| BP | GO:0007059 | chromosome segregation | 25/499 | 435/18614 | 0.000311078 | 0.010362045 | 0.008686334 | TRIP13/BIRC5/KIF4A/CDC6/MYBL2/CCNE1/NCAPG/TTK/CDC20/TEX11/NCAPH/KIF18A/DLGAP5/CDCA8/KIF23/CENPE/KIF2C/MAEL/MKI67/SKA1/SGO2/KIF15/PLK1/BUB1/CDCA2 | 25 |
| BP | GO:1903532 | positive regulation of secretion by cell | 19/499 | 289/18614 | 0.000315939 | 0.010442999 | 0.008754197 | CD38/RAB27B/SYT1/OXCT1/TREM2/GHRHR/PLA2G4A/SPP1/IL1B/TNFRSF11A/TRPM2/PTGES/DAB2/ITGB2/ITGAM/PLA2G1B/PCSK1/C1QTNF12/CD177 | 19 |
| BP | GO:0042742 | defense response to bacterium | 20/499 | 314/18614 | 0.0003349 | 0.010985243 | 0.00920875 | SLC11A1/ARG2/TREM2/CHGA/WFDC2/PI3/IL1B/RNASE1/BPIFA2/S100A8/FCGR1A/CXCL13/COLEC12/SLAMF8/FCER1G/S100A9/CLEC4E/PLA2G1B/DMBT1/PLA2G2A | 20 |
| BP | GO:0061844 | antimicrobial humoral immune response mediated by antimicrobial peptide | 9/499 | 82/18614 | 0.000343721 | 0.011179171 | 0.009371317 | PF4V1/REG1A/CXCL13/S100A9/CXCL5/CXCL1/CXCL8/PLA2G1B/CCL13 | 9 |
| BP | GO:0051985 | negative regulation of chromosome segregation | 7/499 | 50/18614 | 0.000351219 | 0.011179171 | 0.009371317 | TRIP13/BIRC5/TTK/CDC20/CDCA8/PLK1/BUB1 | 7 |
| BP | GO:1902100 | negative regulation of metaphase/anaphase transition of cell cycle | 7/499 | 50/18614 | 0.000351219 | 0.011179171 | 0.009371317 | TRIP13/BIRC5/TTK/CDC20/CDCA8/PLK1/BUB1 | 7 |
| BP | GO:1905819 | negative regulation of chromosome separation | 7/499 | 50/18614 | 0.000351219 | 0.011179171 | 0.009371317 | TRIP13/BIRC5/TTK/CDC20/CDCA8/PLK1/BUB1 | 7 |
| BP | GO:0032613 | interleukin-10 production | 8/499 | 66/18614 | 0.000370073 | 0.011607324 | 0.009730231 | HGF/FCGR2B/TREM2/XCL1/IL20RB/TIGIT/LILRB4/PDCD1LG2 | 8 |
| BP | GO:0032653 | regulation of interleukin-10 production | 8/499 | 66/18614 | 0.000370073 | 0.011607324 | 0.009730231 | HGF/FCGR2B/TREM2/XCL1/IL20RB/TIGIT/LILRB4/PDCD1LG2 | 8 |
| BP | GO:0051047 | positive regulation of secretion | 20/499 | 317/18614 | 0.000378491 | 0.011747643 | 0.009847858 | CD38/RAB27B/SYT1/OXCT1/TREM2/GHRHR/PLA2G4A/SPP1/IL1B/TNFRSF11A/TRPM2/S100A8/PTGES/DAB2/ITGB2/ITGAM/PLA2G1B/PCSK1/C1QTNF12/CD177 | 20 |
| BP | GO:0050764 | regulation of phagocytosis | 10/499 | 101/18614 | 0.000380015 | 0.011747643 | 0.009847858 | SLC11A1/FCGR2B/PTPRC/TREM2/IL2RB/IL1B/IL2RG/FCGR1A/FCER1G/SPHK1 | 10 |
| BP | GO:0010951 | negative regulation of endopeptidase activity | 13/499 | 160/18614 | 0.000385601 | 0.011835209 | 0.009921263 | PLAUR/DPEP1/HGF/CD44/LAMP3/MT3/BIRC5/BIRC7/RENBP/SERPINE2/SFN/SPOCK3/MAGEA3 | 13 |
| BP | GO:0032306 | regulation of prostaglandin secretion | 4/499 | 14/18614 | 0.000412424 | 0.012221967 | 0.010245476 | PLA2G4A/IL1B/TNFRSF11A/PTGES | 4 |
| BP | GO:0032308 | positive regulation of prostaglandin secretion | 4/499 | 14/18614 | 0.000412424 | 0.012221967 | 0.010245476 | PLA2G4A/IL1B/TNFRSF11A/PTGES | 4 |
| BP | GO:0045059 | positive thymic T cell selection | 4/499 | 14/18614 | 0.000412424 | 0.012221967 | 0.010245476 | PTPRC/CD3G/CD3D/TOX | 4 |
| BP | GO:0051231 | spindle elongation | 4/499 | 14/18614 | 0.000412424 | 0.012221967 | 0.010245476 | BIRC5/KIF4A/CDCA8/KIF23 | 4 |
| BP | GO:0051255 | spindle midzone assembly | 4/499 | 14/18614 | 0.000412424 | 0.012221967 | 0.010245476 | BIRC5/KIF4A/CDCA8/KIF23 | 4 |
| BP | GO:0051146 | striated muscle cell differentiation | 19/499 | 297/18614 | 0.000443441 | 0.013016865 | 0.010911827 | CYP26B1/NEBL/TNNT1/CNTNAP1/MYH3/RGS2/ACTL8/RGS4/FLNC/POPDC3/MYO18B/FHOD3/PDGFRA/ADAM12/G6PD/MSX1/IGF2/KEL/MYMX | 19 |
| BP | GO:0018108 | peptidyl-tyrosine phosphorylation | 22/499 | 370/18614 | 0.000445306 | 0.013016865 | 0.010911827 | CNTN1/HGF/CD44/PKM/PTPRC/IL11/TREM2/OSM/AREG/TTK/EREG/EPO/PDGFRA/FCGR1A/SAMSN1/NCF1/ITGB2/IGF2/ROR2/EFNA5/LILRB4/TNFRSF18 | 22 |
| BP | GO:0018212 | peptidyl-tyrosine modification | 22/499 | 372/18614 | 0.000478924 | 0.013756266 | 0.011531655 | CNTN1/HGF/CD44/PKM/PTPRC/IL11/TREM2/OSM/AREG/TTK/EREG/EPO/PDGFRA/FCGR1A/SAMSN1/NCF1/ITGB2/IGF2/ROR2/EFNA5/LILRB4/TNFRSF18 | 22 |
| BP | GO:0045742 | positive regulation of epidermal growth factor receptor signaling pathway | 6/499 | 38/18614 | 0.000479615 | 0.013756266 | 0.011531655 | PLAUR/AGR2/AREG/FASLG/EREG/NCF1 | 6 |
| BP | GO:0033045 | regulation of sister chromatid segregation | 10/499 | 104/18614 | 0.00048076 | 0.013756266 | 0.011531655 | TRIP13/BIRC5/CDC6/TTK/CDC20/DLGAP5/CDCA8/CENPE/PLK1/BUB1 | 10 |
| BP | GO:1903131 | mononuclear cell differentiation | 26/499 | 474/18614 | 0.000483406 | 0.013756266 | 0.011531655 | CYP26B1/FCGR2B/CDH17/PTPRC/LAG3/IL11/TREM2/TNFSF13B/IL4I1/POU2AF1/IL1B/FOXJ1/IL2RA/TRPM2/CTSK/IL2RG/BATF/SLAMF8/FCER1G/CD3G/CLEC4E/CD3D/ADGRG3/CSF1/LILRB4/TOX | 26 |
| BP | GO:0050920 | regulation of chemotaxis | 16/499 | 230/18614 | 0.000499699 | 0.014126364 | 0.011841901 | CCL26/SEMA6A/TREM2/TNFAIP6/PDGFRA/TUBB2B/XCL1/SLIT2/TPBG/CXCL13/SLAMF8/NBL1/CXCL8/SEMA3E/CSF1/LPAR1 | 16 |
| BP | GO:0033047 | regulation of mitotic sister chromatid segregation | 7/499 | 53/18614 | 0.000505827 | 0.014206132 | 0.01190877 | TRIP13/BIRC5/TTK/CDC20/CDCA8/PLK1/BUB1 | 7 |
| BP | GO:1901654 | response to ketone | 15/499 | 208/18614 | 0.000510042 | 0.014231506 | 0.01193004 | CD38/CA9/SPP1/PTGFR/EPO/POSTN/CYP1B1/SLIT2/NCF1/HOXB13/CYBB/P2RY6/FIBIN/NQO1/EFNA5 | 15 |
| BP | GO:0032370 | positive regulation of lipid transport | 9/499 | 87/18614 | 0.000534745 | 0.014824521 | 0.012427155 | TREM2/PLTP/PLA2G4A/FASLG/SPP1/IL1B/TNFRSF11A/PTGES/DAB2 | 9 |
| BP | GO:0016064 | immunoglobulin mediated immune response | 12/499 | 145/18614 | 0.000542274 | 0.014936868 | 0.012521333 | FCGR2B/PTPRC/TREM2/IL2RB/FOXJ1/XCL1/FCGR1A/BATF/FCER1G/C1QB/FCGR3A/HLA-DQA2 | 12 |
| BP | GO:0006690 | icosanoid metabolic process | 11/499 | 125/18614 | 0.000546052 | 0.014945129 | 0.012528259 | DPEP1/AKR1B1/PTGS1/PLA2G4A/IL1B/ALOX5AP/CYP1B1/CYP2C9/PTGES/FABP5/PLA2G1B | 11 |
| BP | GO:0002679 | respiratory burst involved in defense response | 4/499 | 15/18614 | 0.000550534 | 0.014972446 | 0.012551158 | TREM2/PIK3CG/NCF1/SLAMF8 | 4 |
| BP | GO:0002548 | monocyte chemotaxis | 8/499 | 71/18614 | 0.000610069 | 0.016384166 | 0.01373458 | CCL26/CALCA/TNFRSF11A/XCL1/SLIT2/SLAMF8/NBL1/CCL13 | 8 |
| BP | GO:0048002 | antigen processing and presentation of peptide antigen | 8/499 | 71/18614 | 0.000610069 | 0.016384166 | 0.01373458 | SLC11A1/FCGR2B/CD209/TREM2/ULBP2/FCGR1A/FCER1G/HLA-DQA2 | 8 |
| BP | GO:0061900 | glial cell activation | 7/499 | 55/18614 | 0.000635973 | 0.016905686 | 0.014171762 | PTPRC/TREM2/CTSC/IL1B/ITGB2/ITGAM/SPHK1 | 7 |
| BP | GO:1901186 | positive regulation of ERBB signaling pathway | 6/499 | 40/18614 | 0.000637357 | 0.016905686 | 0.014171762 | PLAUR/AGR2/AREG/FASLG/EREG/NCF1 | 6 |
| BP | GO:0019724 | B cell mediated immunity | 12/499 | 148/18614 | 0.000651462 | 0.017069106 | 0.014308754 | FCGR2B/PTPRC/TREM2/IL2RB/FOXJ1/XCL1/FCGR1A/BATF/FCER1G/C1QB/FCGR3A/HLA-DQA2 | 12 |
| BP | GO:0032946 | positive regulation of mononuclear cell proliferation | 12/499 | 148/18614 | 0.000651462 | 0.017069106 | 0.014308754 | CD38/PTPRC/CD209/TNFSF13B/IL1B/EPO/IL2RA/XCL1/IGF2/CSF1/PDCD1LG2/FCGR3A | 12 |
| BP | GO:0090307 | mitotic spindle assembly | 8/499 | 72/18614 | 0.000670526 | 0.017400981 | 0.01458696 | BIRC5/KIF4A/MYBL2/CDC20/CDCA8/KIF23/KIF15/PLK1 | 8 |
| BP | GO:0051984 | positive regulation of chromosome segregation | 5/499 | 27/18614 | 0.000672228 | 0.017400981 | 0.01458696 | BIRC5/CDC6/NCAPG/NCAPH/CDCA8 | 5 |
| BP | GO:0051321 | meiotic cell cycle | 18/499 | 284/18614 | 0.000692685 | 0.017619879 | 0.014770458 | CYP26B1/TRIP13/RAD54L/CCNE1/TTK/CDC20/TEX11/NCAPH/KIF18A/EREG/MAEL/MSX1/SGO2/CDC25A/RPL10L/PLK1/BUB1/PDE3A | 18 |
| BP | GO:0002707 | negative regulation of lymphocyte mediated immunity | 7/499 | 56/18614 | 0.000710308 | 0.017619879 | 0.014770458 | FCGR2B/PTPRC/IL4I1/FOXJ1/XCL1/IL20RB/LILRB4 | 7 |
| BP | GO:0002823 | negative regulation of adaptive immune response based on somatic recombination of immune receptors built from immunoglobulin superfamily domains | 7/499 | 56/18614 | 0.000710308 | 0.017619879 | 0.014770458 | FCGR2B/PTPRC/IL4I1/FOXJ1/XCL1/IL20RB/LILRB4 | 7 |
| BP | GO:0045839 | negative regulation of mitotic nuclear division | 7/499 | 56/18614 | 0.000710308 | 0.017619879 | 0.014770458 | TRIP13/BIRC5/TTK/CDC20/CDCA8/PLK1/BUB1 | 7 |
| BP | GO:2000027 | regulation of animal organ morphogenesis | 11/499 | 129/18614 | 0.000712042 | 0.017619879 | 0.014770458 | HGF/DAB2/FZD1/VANGL2/MSX1/CTHRC1/ROR2/SIX2/FZD2/CSF1/SAPCD2 | 11 |
| BP | GO:0006735 | NADH regeneration | 4/499 | 16/18614 | 0.000718578 | 0.017619879 | 0.014770458 | PKM/ENO2/HK2/HK3 | 4 |
| BP | GO:0044849 | estrous cycle | 4/499 | 16/18614 | 0.000718578 | 0.017619879 | 0.014770458 | CA12/CYP1B1/TRPM2/HAS2 | 4 |
| BP | GO:0061621 | canonical glycolysis | 4/499 | 16/18614 | 0.000718578 | 0.017619879 | 0.014770458 | PKM/ENO2/HK2/HK3 | 4 |
| BP | GO:0061718 | glucose catabolic process to pyruvate | 4/499 | 16/18614 | 0.000718578 | 0.017619879 | 0.014770458 | PKM/ENO2/HK2/HK3 | 4 |
| BP | GO:0002683 | negative regulation of immune system process | 26/499 | 487/18614 | 0.000721689 | 0.017619879 | 0.014770458 | FCGR2B/ARG2/PTPRC/LAG3/TREM2/IL4I1/TNFAIP6/FOXJ1/SMPDL3B/IL2RA/GPNMB/XCL1/ILDR2/SLIT2/SAMSN1/VSIG4/SLAMF8/NBL1/MNDA/IL17D/IL20RB/TIGIT/LILRB4/PLA2G2A/PDCD1LG2/MMP12 | 26 |
| BP | GO:0052548 | regulation of endopeptidase activity | 20/499 | 336/18614 | 0.000787389 | 0.019103681 | 0.016014305 | PLAUR/DPEP1/HGF/NLRP2/CD44/LAMP3/MT3/BIRC5/BIRC7/RENBP/FASLG/EGLN3/SERPINE2/PMAIP1/S100A8/S100A9/AIM2/SFN/SPOCK3/MAGEA3 | 20 |
| BP | GO:0090175 | regulation of establishment of planar polarity | 7/499 | 57/18614 | 0.000791356 | 0.019103681 | 0.016014305 | DAB2/FZD1/VANGL2/CTHRC1/ROR2/FZD2/SAPCD2 | 7 |
| BP | GO:1905820 | positive regulation of chromosome separation | 5/499 | 28/18614 | 0.000800513 | 0.019216779 | 0.016109114 | BIRC5/NCAPG/NCAPH/DLGAP5/CDCA8 | 5 |
| BP | GO:0003018 | vascular process in circulatory system | 17/499 | 265/18614 | 0.000845228 | 0.020177459 | 0.016914436 | CD38/SLC7A8/SLC1A5/CALCA/HRH2/RGS2/SLC2A1/SCPEP1/SLC6A6/NTS/SLIT2/SLC13A3/FABP5/PDE3A/HRH1/KEL/C2CD4A | 17 |
| BP | GO:1905954 | positive regulation of lipid localization | 10/499 | 112/18614 | 0.000862261 | 0.020470363 | 0.017159973 | TREM2/PLTP/PLA2G4A/FASLG/SPP1/IL1B/HILPDA/TNFRSF11A/PTGES/DAB2 | 10 |
| BP | GO:0030198 | extracellular matrix organization | 19/499 | 314/18614 | 0.000869251 | 0.020522923 | 0.017204033 | NOX1/COL11A1/APLP1/LOX/FMOD/POSTN/PDGFRA/CYP1B1/FKBP10/CTSK/CREB3L1/PDPN/OLFML2B/MMP10/HAS2/COL8A2/COL4A5/MMP12/PRSS2 | 19 |
| BP | GO:0099024 | plasma membrane invagination | 7/499 | 58/18614 | 0.000879537 | 0.020583558 | 0.017254862 | FCGR2B/TREM2/HAVCR1/GULP1/FCGR1A/ITGB2/ITGAM | 7 |
| BP | GO:0042698 | ovulation cycle | 8/499 | 75/18614 | 0.0008814 | 0.020583558 | 0.017254862 | CA12/TNFAIP6/EREG/PDGFRA/CYP1B1/TRPM2/SLIT2/HAS2 | 8 |
| BP | GO:0043062 | extracellular structure organization | 19/499 | 315/18614 | 0.000902651 | 0.020853179 | 0.017480881 | NOX1/COL11A1/APLP1/LOX/FMOD/POSTN/PDGFRA/CYP1B1/FKBP10/CTSK/CREB3L1/PDPN/OLFML2B/MMP10/HAS2/COL8A2/COL4A5/MMP12/PRSS2 | 19 |
| BP | GO:0070372 | regulation of ERK1 and ERK2 cascade | 19/499 | 315/18614 | 0.000902651 | 0.020853179 | 0.017480881 | CCL26/CD44/PTPRC/MT3/SEMA6A/TREM2/DUSP4/IL1B/EPO/PDGFRA/GPNMB/TNFRSF11A/XCL1/TPBG/DAB2/P2RY6/CCL13/TNFAIP8L3/PLA2G2A | 19 |
| BP | GO:0002237 | response to molecule of bacterial origin | 21/499 | 366/18614 | 0.000939418 | 0.021444685 | 0.017976731 | SLC11A1/FCGR2B/TREM2/PF4V1/FASLG/PTGFR/IL1B/EPO/TNFRSF11A/S100A8/REN/CXCL13/S100A9/CXCL5/CXCL1/CXCL8/TLR1/PCSK1/NQO1/CSF1/PDCD1LG2 | 21 |
| BP | GO:0014002 | astrocyte development | 6/499 | 43/18614 | 0.000945993 | 0.021444685 | 0.017976731 | MT3/TREM2/IL1B/S100A8/S100A9/ROR2 | 6 |
| BP | GO:0033574 | response to testosterone | 6/499 | 43/18614 | 0.000945993 | 0.021444685 | 0.017976731 | CA9/SPP1/EPO/NCF1/HOXB13/NQO1 | 6 |
| BP | GO:0048017 | inositol lipid-mediated signaling | 13/499 | 176/18614 | 0.000948217 | 0.021444685 | 0.017976731 | HGF/TREM2/OSM/PIK3CG/PDGFRA/SERPINE2/CEP55/NCF1/ROR2/SEMA3E/TNFAIP8L3/FCGR3A/MUC5AC | 13 |
| BP | GO:0046470 | phosphatidylcholine metabolic process | 8/499 | 76/18614 | 0.000962445 | 0.021652496 | 0.018150935 | APOA4/PLA2G4A/RAB38/SLC44A5/LPCAT1/FABP5/PLA2G1B/PLA2G2A | 8 |
| BP | GO:0045229 | external encapsulating structure organization | 19/499 | 317/18614 | 0.000972765 | 0.02177068 | 0.018250007 | NOX1/COL11A1/APLP1/LOX/FMOD/POSTN/PDGFRA/CYP1B1/FKBP10/CTSK/CREB3L1/PDPN/OLFML2B/MMP10/HAS2/COL8A2/COL4A5/MMP12/PRSS2 | 19 |
| BP | GO:0070374 | positive regulation of ERK1 and ERK2 cascade | 15/499 | 222/18614 | 0.000997195 | 0.022201807 | 0.018611414 | CCL26/CD44/PTPRC/MT3/TREM2/EPO/PDGFRA/GPNMB/TNFRSF11A/XCL1/TPBG/P2RY6/CCL13/TNFAIP8L3/PLA2G2A | 15 |
| BP | GO:0006869 | lipid transport | 24/499 | 447/18614 | 0.001056638 | 0.023403996 | 0.019619189 | TREM2/PLTP/APOA4/SLCO1B3/PLA2G4A/SLC2A1/FASLG/SPP1/IL1B/TNFRSF11A/CRABP2/REN/GULP1/PTGES/DAB2/SLC13A3/FABP7/FABP5/FABP6/PLA2G1B/TNFAIP8L3/CIDEC/PLA2G2A/SELENOM | 24 |
| BP | GO:0002827 | positive regulation of T-helper 1 type immune response | 4/499 | 18/18614 | 0.001157847 | 0.025127622 | 0.021064078 | SLC11A1/PLA2G4A/IL1B/XCL1 | 4 |
| BP | GO:0002923 | regulation of humoral immune response mediated by circulating immunoglobulin | 4/499 | 18/18614 | 0.001157847 | 0.025127622 | 0.021064078 | FCGR2B/PTPRC/TREM2/FOXJ1 | 4 |
| BP | GO:0032310 | prostaglandin secretion | 4/499 | 18/18614 | 0.001157847 | 0.025127622 | 0.021064078 | PLA2G4A/IL1B/TNFRSF11A/PTGES | 4 |
| BP | GO:0061620 | glycolytic process through glucose-6-phosphate | 4/499 | 18/18614 | 0.001157847 | 0.025127622 | 0.021064078 | PKM/ENO2/HK2/HK3 | 4 |
| BP | GO:0061564 | axon development | 25/499 | 479/18614 | 0.001244931 | 0.026881749 | 0.022534533 | CNTN1/CTNNA2/MT3/NRCAM/SEMA6A/APLP1/LHX2/CNTNAP1/APOA4/CSPG5/SPP1/CHN1/TUBB2B/CDH11/CRABP2/SLIT2/UCHL1/CHODL/S100B/SEMA3E/EMB/NDN/EFNA5/TRPV2/KEL | 25 |
| BP | GO:0007409 | axonogenesis | 23/499 | 427/18614 | 0.001278153 | 0.027461126 | 0.023020216 | CNTN1/CTNNA2/MT3/NRCAM/SEMA6A/APLP1/LHX2/CNTNAP1/SPP1/CHN1/TUBB2B/CDH11/CRABP2/SLIT2/UCHL1/CHODL/S100B/SEMA3E/EMB/NDN/EFNA5/TRPV2/KEL | 23 |
| BP | GO:1905039 | carboxylic acid transmembrane transport | 12/499 | 160/18614 | 0.00128981 | 0.027573692 | 0.023114578 | SLC11A1/SLC7A8/SLC1A5/RGS2/RGS4/SLC2A1/SLC6A6/SLC16A3/SLC7A7/SLC13A3/EMB/SLC16A11 | 12 |
| BP | GO:0043030 | regulation of macrophage activation | 7/499 | 62/18614 | 0.001312456 | 0.027885299 | 0.023375793 | FCGR2B/PTPRC/TREM2/CTSC/PLA2G4A/VSIG4/SPHK1 | 7 |
| BP | GO:0007586 | digestion | 11/499 | 139/18614 | 0.001317365 | 0.027885299 | 0.023375793 | PRSS3/VSIG1/APOA4/HRH2/GCNT3/SLC2A5/TFF2/TFF1/MUC13/MUC6/PRSS2 | 11 |
| BP | GO:0014911 | positive regulation of smooth muscle cell migration | 6/499 | 46/18614 | 0.001358396 | 0.028393854 | 0.023802106 | CCN4/CYP1B1/S100A11/HAS2/P2RY6/LPAR1 | 6 |
| BP | GO:1903825 | organic acid transmembrane transport | 12/499 | 161/18614 | 0.00136071 | 0.028393854 | 0.023802106 | SLC11A1/SLC7A8/SLC1A5/RGS2/RGS4/SLC2A1/SLC6A6/SLC16A3/SLC7A7/SLC13A3/EMB/SLC16A11 | 12 |
| BP | GO:0006721 | terpenoid metabolic process | 9/499 | 99/18614 | 0.001361213 | 0.028393854 | 0.023802106 | CYP26B1/AKR1B1/SCPEP1/CYP1B1/CYP2C9/CRABP2/CYP3A4/AKR1B10/AKR1B15 | 9 |
| BP | GO:0021782 | glial cell development | 10/499 | 119/18614 | 0.001373498 | 0.028511695 | 0.023900891 | CNTN1/MT3/TREM2/CNTNAP1/CSPG5/IL1B/S100A8/S100A9/ROR2/LPAR1 | 10 |
| BP | GO:0002283 | neutrophil activation involved in immune response | 4/499 | 19/18614 | 0.001435788 | 0.029249127 | 0.024519068 | FCER1G/ITGB2/ITGAM/CD177 | 4 |
| BP | GO:0061615 | glycolytic process through fructose-6-phosphate | 4/499 | 19/18614 | 0.001435788 | 0.029249127 | 0.024519068 | PKM/ENO2/HK2/HK3 | 4 |
| BP | GO:0032623 | interleukin-2 production | 7/499 | 63/18614 | 0.001443057 | 0.029249127 | 0.024519068 | PTPRC/LAG3/IL1B/XCL1/VSIG4/IL20RB/LILRB4 | 7 |
| BP | GO:0032663 | regulation of interleukin-2 production | 7/499 | 63/18614 | 0.001443057 | 0.029249127 | 0.024519068 | PTPRC/LAG3/IL1B/XCL1/VSIG4/IL20RB/LILRB4 | 7 |
| BP | GO:0051784 | negative regulation of nuclear division | 7/499 | 63/18614 | 0.001443057 | 0.029249127 | 0.024519068 | TRIP13/BIRC5/TTK/CDC20/CDCA8/PLK1/BUB1 | 7 |
| BP | GO:0070555 | response to interleukin-1 | 11/499 | 141/18614 | 0.001478566 | 0.029741927 | 0.024932174 | CD38/CCL26/IL1B/EPO/TNFRSF11A/XCL1/TRIM63/CXCL8/HAS2/PCSK1/CCL13 | 11 |
| BP | GO:0048588 | developmental cell growth | 15/499 | 231/18614 | 0.001483394 | 0.029741927 | 0.024932174 | SYT1/MT3/NRCAM/SEMA6A/LHX2/RGS2/RGS4/SPP1/CRABP2/SLIT2/G6PD/SEMA3E/NDN/EFNA5/TRPV2 | 15 |
| BP | GO:0001516 | prostaglandin biosynthetic process | 5/499 | 32/18614 | 0.001501978 | 0.029741927 | 0.024932174 | PTGS1/PLA2G4A/IL1B/PTGES/FABP5 | 5 |
| BP | GO:0010669 | epithelial structure maintenance | 5/499 | 32/18614 | 0.001501978 | 0.029741927 | 0.024932174 | VSIG1/TFF2/TFF1/MUC13/MUC6 | 5 |
| BP | GO:0046457 | prostanoid biosynthetic process | 5/499 | 32/18614 | 0.001501978 | 0.029741927 | 0.024932174 | PTGS1/PLA2G4A/IL1B/PTGES/FABP5 | 5 |
| BP | GO:0001774 | microglial cell activation | 6/499 | 47/18614 | 0.001522506 | 0.03001012 | 0.025156996 | PTPRC/TREM2/CTSC/ITGB2/ITGAM/SPHK1 | 6 |
| BP | GO:0042692 | muscle cell differentiation | 22/499 | 410/18614 | 0.001694921 | 0.033229008 | 0.027855338 | CYP26B1/NEBL/TNNT1/CNTNAP1/MYH3/LOX/RGS2/ACTL8/RGS4/EREG/FLNC/POPDC3/MYO18B/FHOD3/PDGFRA/ADAM12/UCHL1/G6PD/MSX1/IGF2/KEL/MYMX | 22 |
| BP | GO:0032309 | icosanoid secretion | 6/499 | 48/18614 | 0.001701276 | 0.033229008 | 0.027855338 | PLA2G4A/IL1B/TNFRSF11A/PTGES/PLA2G1B/PLA2G2A | 6 |
| BP | GO:0010324 | membrane invagination | 7/499 | 65/18614 | 0.001734521 | 0.033555862 | 0.028129334 | FCGR2B/TREM2/HAVCR1/GULP1/FCGR1A/ITGB2/ITGAM | 7 |
| BP | GO:0014065 | phosphatidylinositol 3-kinase signaling | 11/499 | 144/18614 | 0.001750369 | 0.033555862 | 0.028129334 | HGF/TREM2/OSM/PIK3CG/PDGFRA/SERPINE2/CEP55/NCF1/ROR2/SEMA3E/FCGR3A | 11 |
| BP | GO:0071356 | cellular response to tumor necrosis factor | 15/499 | 235/18614 | 0.001755979 | 0.033555862 | 0.028129334 | CCL26/BIRC7/TNFSF13B/CALCA/CYP1B1/TNFRSF11A/XCL1/CTSK/CRHBP/AIM2/CXCL8/HAS2/SPHK1/CCL13/TNFRSF18 | 15 |
| BP | GO:0042474 | middle ear morphogenesis | 4/499 | 20/18614 | 0.001757056 | 0.033555862 | 0.028129334 | PRRX1/MSX1/OSR2/SIX2 | 4 |
| BP | GO:1903978 | regulation of microglial cell activation | 4/499 | 20/18614 | 0.001757056 | 0.033555862 | 0.028129334 | PTPRC/TREM2/CTSC/SPHK1 | 4 |
| BP | GO:0070665 | positive regulation of leukocyte proliferation | 12/499 | 166/18614 | 0.001765279 | 0.033563743 | 0.02813594 | CD38/PTPRC/CD209/TNFSF13B/IL1B/EPO/IL2RA/XCL1/IGF2/CSF1/PDCD1LG2/FCGR3A | 12 |
| BP | GO:0000281 | mitotic cytokinesis | 8/499 | 84/18614 | 0.001847931 | 0.034857364 | 0.029220362 | ANLN/BIRC5/KIF4A/CENPA/CDCA8/KIF23/CEP55/PLK1 | 8 |
| BP | GO:0050671 | positive regulation of lymphocyte proliferation | 11/499 | 145/18614 | 0.001849541 | 0.034857364 | 0.029220362 | CD38/PTPRC/CD209/TNFSF13B/IL1B/EPO/IL2RA/XCL1/IGF2/PDCD1LG2/FCGR3A | 11 |
| BP | GO:0072593 | reactive oxygen species metabolic process | 15/499 | 237/18614 | 0.001907229 | 0.035787612 | 0.030000173 | NOX1/ARG2/MT3/APOA4/NCF2/CYP1B1/PMAIP1/NCF1/HK2/G6PD/ITGB2/CYBB/ITGAM/NQO1/CD177 | 15 |
| BP | GO:0031349 | positive regulation of defense response | 23/499 | 441/18614 | 0.001938864 | 0.036223046 | 0.030365191 | LAG3/TREM2/OSM/CCN4/PIK3CG/CTSC/EREG/IL1B/SMPDL3B/ALOX5AP/TNFRSF11A/S100A8/FCGR1A/COLEC12/S100A9/MNDA/AIM2/CGAS/CLEC4E/TLR1/PLA2G2A/C2CD4A/MMP12 | 23 |
| BP | GO:0050777 | negative regulation of immune response | 13/499 | 191/18614 | 0.001985242 | 0.036820864 | 0.030866332 | FCGR2B/ARG2/PTPRC/TREM2/IL4I1/FOXJ1/XCL1/SAMSN1/VSIG4/SLAMF8/IL20RB/LILRB4/MMP12 | 13 |
| BP | GO:0001523 | retinoid metabolic process | 8/499 | 85/18614 | 0.001993175 | 0.036820864 | 0.030866332 | CYP26B1/AKR1B1/SCPEP1/CYP1B1/CRABP2/CYP3A4/AKR1B10/AKR1B15 | 8 |
| BP | GO:0033314 | mitotic DNA replication checkpoint signaling | 3/499 | 10/18614 | 0.00199657 | 0.036820864 | 0.030866332 | ORC1/CLSPN/CDC6 | 3 |
| BP | GO:0140694 | non-membrane-bounded organelle assembly | 21/499 | 390/18614 | 0.002051027 | 0.037421878 | 0.031370152 | ANLN/WDR62/NEBL/BIRC5/KIF4A/MYBL2/TNNT1/MYH3/CENPA/ACTL8/CDC20/DLGAP5/FLNC/CDCA8/FHOD3/PDGFRA/KIF23/CENPE/KIF15/RPL10L/PLK1 | 21 |
| BP | GO:0042102 | positive regulation of T cell proliferation | 9/499 | 105/18614 | 0.00205306 | 0.037421878 | 0.031370152 | PTPRC/CD209/TNFSF13B/IL1B/EPO/IL2RA/XCL1/IGF2/PDCD1LG2 | 9 |
| BP | GO:0010876 | lipid localization | 25/499 | 497/18614 | 0.002055407 | 0.037421878 | 0.031370152 | TREM2/PLTP/APOA4/SLCO1B3/PLA2G4A/SLC2A1/FASLG/SPP1/IL1B/HILPDA/TNFRSF11A/CRABP2/REN/GULP1/PTGES/DAB2/SLC13A3/FABP7/FABP5/FABP6/PLA2G1B/TNFAIP8L3/CIDEC/PLA2G2A/SELENOM | 25 |
| BP | GO:0002269 | leukocyte activation involved in inflammatory response | 6/499 | 50/18614 | 0.002106123 | 0.037421878 | 0.031370152 | PTPRC/TREM2/CTSC/ITGB2/ITGAM/SPHK1 | 6 |
| BP | GO:0006692 | prostanoid metabolic process | 6/499 | 50/18614 | 0.002106123 | 0.037421878 | 0.031370152 | AKR1B1/PTGS1/PLA2G4A/IL1B/PTGES/FABP5 | 6 |
| BP | GO:0006693 | prostaglandin metabolic process | 6/499 | 50/18614 | 0.002106123 | 0.037421878 | 0.031370152 | AKR1B1/PTGS1/PLA2G4A/IL1B/PTGES/FABP5 | 6 |
| BP | GO:0010927 | cellular component assembly involved in morphogenesis | 10/499 | 126/18614 | 0.002107936 | 0.037421878 | 0.031370152 | CNTN1/GPC1/NEBL/TNNT1/CNTNAP1/MYH3/ACTL8/FLNC/FHOD3/PDGFRA | 10 |
| BP | GO:0045471 | response to ethanol | 10/499 | 126/18614 | 0.002107936 | 0.037421878 | 0.031370152 | OXCT1/RGS2/RGS4/TNFRSF11A/CTSK/S100A8/CRHBP/G6PD/CYBB/NQO1 | 10 |
| BP | GO:0002888 | positive regulation of myeloid leukocyte mediated immunity | 4/499 | 21/18614 | 0.002124957 | 0.037421878 | 0.031370152 | FCGR1A/ITGB2/ITGAM/CD177 | 4 |
| BP | GO:0032305 | positive regulation of icosanoid secretion | 4/499 | 21/18614 | 0.002124957 | 0.037421878 | 0.031370152 | PLA2G4A/IL1B/TNFRSF11A/PTGES | 4 |
| BP | GO:0051315 | attachment of mitotic spindle microtubules to kinetochore | 4/499 | 21/18614 | 0.002124957 | 0.037421878 | 0.031370152 | BIRC5/CDCA8/CENPE/KIF2C | 4 |
| BP | GO:0070371 | ERK1 and ERK2 cascade | 19/499 | 341/18614 | 0.002250248 | 0.039390951 | 0.033020794 | CCL26/CD44/PTPRC/MT3/SEMA6A/TREM2/DUSP4/IL1B/EPO/PDGFRA/GPNMB/TNFRSF11A/XCL1/TPBG/DAB2/P2RY6/CCL13/TNFAIP8L3/PLA2G2A | 19 |
| BP | GO:0002704 | negative regulation of leukocyte mediated immunity | 7/499 | 68/18614 | 0.002255102 | 0.039390951 | 0.033020794 | FCGR2B/PTPRC/IL4I1/FOXJ1/XCL1/IL20RB/LILRB4 | 7 |
| BP | GO:0007143 | female meiotic nuclear division | 5/499 | 35/18614 | 0.002266898 | 0.039436685 | 0.033059132 | TRIP13/TTK/NCAPH/EREG/PLK1 | 5 |
| BP | GO:0001558 | regulation of cell growth | 22/499 | 420/18614 | 0.002283829 | 0.039571016 | 0.03317174 | CD38/SYT1/MT3/NRCAM/SEMA6A/RGS2/RGS4/SPP1/SERPINE2/CRABP2/S100A8/SLIT2/DAB2/G6PD/MSX1/S100A9/SEMA3E/SFN/SPHK1/EFNA5/TRPV2/PRSS2 | 22 |
| BP | GO:0022600 | digestive system process | 9/499 | 107/18614 | 0.002337556 | 0.040339274 | 0.033815758 | VSIG1/APOA4/HRH2/GCNT3/SLC2A5/TFF2/TFF1/MUC13/MUC6 | 9 |
| BP | GO:0048015 | phosphatidylinositol-mediated signaling | 12/499 | 172/18614 | 0.002376183 | 0.040841842 | 0.034237052 | HGF/TREM2/OSM/PIK3CG/PDGFRA/SERPINE2/CEP55/NCF1/ROR2/SEMA3E/FCGR3A/MUC5AC | 12 |
| BP | GO:0030098 | lymphocyte differentiation | 22/499 | 422/18614 | 0.002420375 | 0.041435668 | 0.034734847 | CYP26B1/FCGR2B/CDH17/PTPRC/LAG3/IL11/TNFSF13B/IL4I1/POU2AF1/IL1B/FOXJ1/IL2RA/IL2RG/BATF/SLAMF8/FCER1G/CD3G/CLEC4E/CD3D/ADGRG3/LILRB4/TOX | 22 |
| BP | GO:0016101 | diterpenoid metabolic process | 8/499 | 88/18614 | 0.002483427 | 0.042346369 | 0.035498273 | CYP26B1/AKR1B1/SCPEP1/CYP1B1/CRABP2/CYP3A4/AKR1B10/AKR1B15 | 8 |
| BP | GO:0046683 | response to organophosphorus | 10/499 | 129/18614 | 0.002506702 | 0.042574305 | 0.035689348 | PIK3CG/AREG/IL1B/CYP1B1/REN/CRHBP/P2RY6/PDE3A/LPAR1/TRIM16 | 10 |
| BP | GO:0032303 | regulation of icosanoid secretion | 4/499 | 22/18614 | 0.002542747 | 0.042680405 | 0.03577829 | PLA2G4A/IL1B/TNFRSF11A/PTGES | 4 |
| BP | GO:0045061 | thymic T cell selection | 4/499 | 22/18614 | 0.002542747 | 0.042680405 | 0.03577829 | PTPRC/CD3G/CD3D/TOX | 4 |
| BP | GO:2000479 | regulation of cAMP-dependent protein kinase activity | 4/499 | 22/18614 | 0.002542747 | 0.042680405 | 0.03577829 | NPFFR2/PPP1R1B/PKIB/PKIA | 4 |
| BP | GO:0032496 | response to lipopolysaccharide | 19/499 | 345/18614 | 0.002562228 | 0.042840048 | 0.035912116 | SLC11A1/TREM2/PF4V1/FASLG/PTGFR/IL1B/EPO/TNFRSF11A/S100A8/REN/CXCL13/S100A9/CXCL5/CXCL1/CXCL8/PCSK1/NQO1/CSF1/PDCD1LG2 | 19 |
| BP | GO:0010543 | regulation of platelet activation | 6/499 | 52/18614 | 0.00257972 | 0.042965339 | 0.036017145 | PLEK/PLA2G4A/PDGFRA/SERPINE2/FCER1G/PDPN | 6 |
| BP | GO:0050864 | regulation of B cell activation | 10/499 | 130/18614 | 0.002652301 | 0.043469547 | 0.036439815 | CD38/FCGR2B/PTPRC/TNFSF13B/IL4I1/FOXJ1/IL2RG/SAMSN1/SLAMF8/MNDA | 10 |
| BP | GO:0045132 | meiotic chromosome segregation | 9/499 | 109/18614 | 0.002652521 | 0.043469547 | 0.036439815 | TRIP13/CCNE1/TTK/TEX11/NCAPH/MAEL/SGO2/PLK1/BUB1 | 9 |
| BP | GO:0030239 | myofibril assembly | 7/499 | 70/18614 | 0.002663984 | 0.043469547 | 0.036439815 | NEBL/TNNT1/MYH3/ACTL8/FLNC/FHOD3/PDGFRA | 7 |
| BP | GO:0050922 | negative regulation of chemotaxis | 7/499 | 70/18614 | 0.002663984 | 0.043469547 | 0.036439815 | SEMA6A/TNFAIP6/SLIT2/CXCL13/SLAMF8/NBL1/SEMA3E | 7 |
| BP | GO:0001660 | fever generation | 3/499 | 11/18614 | 0.002690924 | 0.043469547 | 0.036439815 | IL1B/TNFRSF11A/PTGES | 3 |
| BP | GO:0006002 | fructose 6-phosphate metabolic process | 3/499 | 11/18614 | 0.002690924 | 0.043469547 | 0.036439815 | GFPT2/HK2/HK3 | 3 |
| BP | GO:0032060 | bleb assembly | 3/499 | 11/18614 | 0.002690924 | 0.043469547 | 0.036439815 | ANLN/EMP3/LPAR1 | 3 |
| BP | GO:0033625 | positive regulation of integrin activation | 3/499 | 11/18614 | 0.002690924 | 0.043469547 | 0.036439815 | CDH17/PLEK/CXCL13 | 3 |
| BP | GO:0007051 | spindle organization | 13/499 | 198/18614 | 0.00272018 | 0.043752596 | 0.03667709 | WDR62/BIRC5/KIF4A/MYBL2/TTK/CDC20/DLGAP5/AUNIP/CDCA8/KIF23/CENPE/KIF15/PLK1 | 13 |
| BP | GO:0002703 | regulation of leukocyte mediated immunity | 15/499 | 246/18614 | 0.00272881 | 0.043752596 | 0.03667709 | FCGR2B/PTPRC/LAG3/TREM2/IL4I1/IL1B/FOXJ1/ULBP2/XCL1/FCGR1A/ITGB2/ITGAM/IL20RB/LILRB4/CD177 | 15 |
| BP | GO:0032368 | regulation of lipid transport | 11/499 | 153/18614 | 0.002819165 | 0.04491356 | 0.037650307 | TREM2/PLTP/APOA4/PLA2G4A/FASLG/SPP1/IL1B/TNFRSF11A/REN/PTGES/DAB2 | 11 |
| BP | GO:0002444 | myeloid leukocyte mediated immunity | 9/499 | 110/18614 | 0.002822123 | 0.04491356 | 0.037650307 | FCGR2B/CHGA/PIK3CG/FCGR1A/ITGB2/ITGAM/PLA2G1B/FCGR3A/CD177 | 9 |
| BP | GO:0007140 | male meiotic nuclear division | 6/499 | 53/18614 | 0.002844472 | 0.044936391 | 0.037669446 | CYP26B1/TRIP13/TEX11/KIF18A/MAEL/RPL10L | 6 |
| BP | GO:0060071 | Wnt signaling pathway, planar cell polarity pathway | 6/499 | 53/18614 | 0.002844472 | 0.044936391 | 0.037669446 | DAB2/FZD1/VANGL2/CTHRC1/ROR2/FZD2 | 6 |
| BP | GO:0014910 | regulation of smooth muscle cell migration | 8/499 | 90/18614 | 0.002859448 | 0.045007505 | 0.03772906 | CCN4/PLAU/CYP1B1/SLIT2/S100A11/HAS2/P2RY6/LPAR1 | 8 |
| BP | GO:0055002 | striated muscle cell development | 7/499 | 71/18614 | 0.002888631 | 0.045300903 | 0.037975011 | NEBL/TNNT1/MYH3/ACTL8/FLNC/FHOD3/PDGFRA | 7 |
| BP | GO:0023061 | signal release | 24/499 | 483/18614 | 0.002927874 | 0.045749367 | 0.038350951 | CD38/SYT1/PFN2/OXCT1/IL11/OSM/CHGA/GHRHR/CSPG5/PLA2G4A/SPP1/IL1B/TNFRSF11A/TRPM2/ILDR2/REN/CRHBP/PTGES/DAB2/SV2A/C1QTNF12/EFNA5/SELENOM/ADORA3 | 24 |
| BP | GO:0002689 | negative regulation of leukocyte chemotaxis | 4/499 | 23/18614 | 0.003013625 | 0.046918641 | 0.039331134 | TNFAIP6/SLIT2/SLAMF8/NBL1 | 4 |
| BP | GO:0050770 | regulation of axonogenesis | 11/499 | 155/18614 | 0.003116476 | 0.048208269 | 0.040412209 | MT3/SEMA6A/SPP1/CHN1/CRABP2/SLIT2/CHODL/SEMA3E/EFNA5/TRPV2/KEL | 11 |
| BP | GO:0038093 | Fc receptor signaling pathway | 6/499 | 54/18614 | 0.003129039 | 0.048208269 | 0.040412209 | FCGR2B/PTPRC/FCGR1A/FCER1G/CLEC4E/FCGR3A | 6 |
| BP | GO:0034219 | carbohydrate transmembrane transport | 10/499 | 133/18614 | 0.003130116 | 0.048208269 | 0.040412209 | SLC2A1/IL1B/SLC2A5/AQP10/SLC5A11/HK2/FABP5/PLA2G1B/ITLN1/C1QTNF12 | 10 |
| BP | GO:0014066 | regulation of phosphatidylinositol 3-kinase signaling | 9/499 | 112/18614 | 0.003186992 | 0.048908943 | 0.040999572 | HGF/TREM2/OSM/PDGFRA/SERPINE2/CEP55/NCF1/ROR2/SEMA3E | 9 |
| BP | GO:0097193 | intrinsic apoptotic signaling pathway | 17/499 | 301/18614 | 0.003268504 | 0.049765775 | 0.04171784 | NOX1/E2F2/PLAUR/CD44/TREM2/EPO/CYP1B1/BCL2A1/PMAIP1/MAEL/S100A8/CREB3L1/MSX1/S100A9/SFN/MLLT11/MAGEA3 | 17 |
| BP | GO:0002335 | mature B cell differentiation | 5/499 | 38/18614 | 0.003282014 | 0.049765775 | 0.04171784 | FCGR2B/CDH17/POU2AF1/IL2RG/SLAMF8 | 5 |
| BP | GO:0043368 | positive T cell selection | 5/499 | 38/18614 | 0.003282014 | 0.049765775 | 0.04171784 | PTPRC/BATF/CD3G/CD3D/TOX | 5 |
| BP | GO:0007204 | positive regulation of cytosolic calcium ion concentration | 12/499 | 179/18614 | 0.003296255 | 0.049765775 | 0.04171784 | CD38/P2RY10/ITPR3/JPH1/PIK3CG/CALCA/PTGFR/EPO/PDGFRA/CXCL13/PLA2G1B/LPAR1 | 12 |
| BP | GO:1901214 | regulation of neuron death | 18/499 | 327/18614 | 0.003300732 | 0.049765775 | 0.04171784 | FCGR2B/MT3/TREM2/CHGA/MYBL2/ENO2/FASLG/EGLN3/EPO/GPNMB/TRPM2/FZD1/G6PD/ITGB2/ITGAM/SEMA3E/NQO1/CSF1 | 18 |
| BP | GO:0048638 | regulation of developmental growth | 18/499 | 328/18614 | 0.003408332 | 0.051208405 | 0.042927173 | SYT1/MT3/NRCAM/SEMA6A/GHRHR/AGR2/STC2/RGS2/RGS4/SPP1/MAEL/CRABP2/G6PD/IGF2/SEMA3E/EFNA5/CSF1/TRPV2 | 18 |
| BP | GO:0097305 | response to alcohol | 15/499 | 252/18614 | 0.00342433 | 0.051269503 | 0.042978391 | OXCT1/RGS2/RGS4/PTGFR/CYP1B1/TNFRSF11A/CTSK/S100A8/SLIT2/CRHBP/G6PD/CYBB/P2RY6/NQO1/EFNA5 | 15 |
| BP | GO:0051781 | positive regulation of cell division | 8/499 | 93/18614 | 0.003505039 | 0.0521043 | 0.043678188 | BIRC5/CDC6/OSM/EREG/IL1B/CDCA8/KIF23/IGF2 | 8 |
| BP | GO:0031650 | regulation of heat generation | 3/499 | 12/18614 | 0.003516951 | 0.0521043 | 0.043678188 | IL1B/TNFRSF11A/PTGES | 3 |
| BP | GO:0043312 | neutrophil degranulation | 3/499 | 12/18614 | 0.003516951 | 0.0521043 | 0.043678188 | ITGB2/ITGAM/CD177 | 3 |
| BP | GO:0002922 | positive regulation of humoral immune response | 4/499 | 24/18614 | 0.003540716 | 0.0521043 | 0.043678188 | FCGR2B/PTPRC/TREM2/IL1B | 4 |
| BP | GO:0045932 | negative regulation of muscle contraction | 4/499 | 24/18614 | 0.003540716 | 0.0521043 | 0.043678188 | TNNT1/PIK3CG/CALCA/RGS2 | 4 |
| BP | GO:0019882 | antigen processing and presentation | 9/499 | 114/18614 | 0.003588033 | 0.052441419 | 0.04396079 | SLC11A1/FCGR2B/CD209/TREM2/ULBP2/FCGR1A/RAB3C/FCER1G/HLA-DQA2 | 9 |
| BP | GO:1904659 | glucose transmembrane transport | 9/499 | 114/18614 | 0.003588033 | 0.052441419 | 0.04396079 | SLC2A1/IL1B/SLC2A5/SLC5A11/HK2/FABP5/PLA2G1B/ITLN1/C1QTNF12 | 9 |
| BP | GO:0016042 | lipid catabolic process | 18/499 | 330/18614 | 0.003632281 | 0.052811645 | 0.044271144 | CYP26B1/DPEP1/OXCT1/MT3/PIK3CG/APOA4/PLA2G4A/SPP1/PLBD1/IL1B/SMPDL3B/CYP1B1/CYP3A4/LIPH/PLA2G1B/SPHK1/PLA2G2A/AKR1B10 | 18 |
| BP | GO:0001736 | establishment of planar polarity | 7/499 | 74/18614 | 0.003650235 | 0.052811645 | 0.044271144 | DAB2/FZD1/VANGL2/CTHRC1/ROR2/FZD2/SAPCD2 | 7 |
| BP | GO:0007164 | establishment of tissue polarity | 7/499 | 74/18614 | 0.003650235 | 0.052811645 | 0.044271144 | DAB2/FZD1/VANGL2/CTHRC1/ROR2/FZD2/SAPCD2 | 7 |
| BP | GO:0045066 | regulatory T cell differentiation | 5/499 | 39/18614 | 0.003683172 | 0.053109365 | 0.044520717 | LAG3/IL4I1/IL2RG/LILRB4/TOX | 5 |
| BP | GO:0060986 | endocrine hormone secretion | 6/499 | 56/18614 | 0.003761192 | 0.053897728 | 0.045181589 | SPP1/IL1B/REN/CRHBP/DAB2/SELENOM | 6 |
| BP | GO:1905952 | regulation of lipid localization | 12/499 | 182/18614 | 0.003769904 | 0.053897728 | 0.045181589 | TREM2/PLTP/APOA4/PLA2G4A/FASLG/SPP1/IL1B/HILPDA/TNFRSF11A/REN/PTGES/DAB2 | 12 |
| BP | GO:0002697 | regulation of immune effector process | 20/499 | 384/18614 | 0.003775475 | 0.053897728 | 0.045181589 | FCGR2B/PTPRC/LAG3/TREM2/IL4I1/IL1B/FOXJ1/ULBP2/XCL1/FCGR1A/VSIG4/BATF/NCF1/SLAMF8/ITGB2/CGAS/ITGAM/IL20RB/LILRB4/CD177 | 20 |
| BP | GO:1990748 | cellular detoxification | 9/499 | 115/18614 | 0.003802864 | 0.054108967 | 0.045358668 | MT3/PTGS1/APOA4/ALOX5AP/PTGES/CLIC2/S100A9/NQO1/AKR1B10 | 9 |
| BP | GO:0070192 | chromosome organization involved in meiotic cell cycle | 7/499 | 75/18614 | 0.003935262 | 0.055807988 | 0.046782929 | TRIP13/CCNE1/TEX11/NCAPH/MAEL/SGO2/BUB1 | 7 |
| BP | GO:0044703 | multi-organism reproductive process | 13/499 | 207/18614 | 0.003977713 | 0.05612493 | 0.047048617 | CD38/ITGA3/PTHLH/CALCA/STC2/RGS2/SLC2A1/SPP1/PTGFR/IL1B/EPO/SERPINE2/CRHBP | 13 |
| BP | GO:0016049 | cell growth | 24/499 | 495/18614 | 0.003983734 | 0.05612493 | 0.047048617 | CD38/SYT1/MT3/NRCAM/SEMA6A/LHX2/RGS2/RGS4/SPP1/SERPINE2/CRABP2/S100A8/SLIT2/DAB2/G6PD/MSX1/S100A9/SEMA3E/SFN/SPHK1/NDN/EFNA5/TRPV2/PRSS2 | 24 |
| BP | GO:0034612 | response to tumor necrosis factor | 15/499 | 257/18614 | 0.00410954 | 0.057022512 | 0.047801045 | CCL26/BIRC7/TNFSF13B/CALCA/CYP1B1/TNFRSF11A/XCL1/CTSK/CRHBP/AIM2/CXCL8/HAS2/SPHK1/CCL13/TNFRSF18 | 15 |
| BP | GO:0002706 | regulation of lymphocyte mediated immunity | 12/499 | 184/18614 | 0.004115041 | 0.057022512 | 0.047801045 | FCGR2B/PTPRC/LAG3/TREM2/IL4I1/IL1B/FOXJ1/ULBP2/XCL1/FCGR1A/IL20RB/LILRB4 | 12 |
| BP | GO:0008210 | estrogen metabolic process | 5/499 | 40/18614 | 0.004118289 | 0.057022512 | 0.047801045 | PDGFRA/CYP1B1/CYP2C9/CYP3A4/AKR1B15 | 5 |
| BP | GO:0006007 | glucose catabolic process | 4/499 | 25/18614 | 0.004127066 | 0.057022512 | 0.047801045 | PKM/ENO2/HK2/HK3 | 4 |
| BP | GO:0010623 | programmed cell death involved in cell development | 4/499 | 25/18614 | 0.004127066 | 0.057022512 | 0.047801045 | FASLG/TEX11/IL1B/MAEL | 4 |
| BP | GO:2000193 | positive regulation of fatty acid transport | 4/499 | 25/18614 | 0.004127066 | 0.057022512 | 0.047801045 | PLA2G4A/IL1B/TNFRSF11A/PTGES | 4 |
| BP | GO:0150076 | neuroinflammatory response | 7/499 | 76/18614 | 0.004236852 | 0.058333481 | 0.048900009 | PTPRC/TREM2/CTSC/IL1B/ITGB2/ITGAM/SPHK1 | 7 |
| BP | GO:1903510 | mucopolysaccharide metabolic process | 8/499 | 96/18614 | 0.004258192 | 0.058333481 | 0.048900009 | CD44/TNFAIP6/IL1B/HAS2/CHST11/HPSE/CHST2/SPOCK3 | 8 |
| BP | GO:0008645 | hexose transmembrane transport | 9/499 | 117/18614 | 0.004262675 | 0.058333481 | 0.048900009 | SLC2A1/IL1B/SLC2A5/SLC5A11/HK2/FABP5/PLA2G1B/ITLN1/C1QTNF12 | 9 |
| BP | GO:0001909 | leukocyte mediated cytotoxicity | 10/499 | 139/18614 | 0.004290494 | 0.058527786 | 0.049062892 | SLAMF7/FCGR2B/PTPRC/LAG3/CTSC/ULBP2/XCL1/FCGR1A/ITGAM/FCGR3A | 10 |
| CC | GO:0030667 | secretory granule membrane | 27/526 | 319/19518 | 1.72E-07 | 7.19E-05 | 6.34E-05 | CD38/PLAUR/SLC11A1/CD44/RAB27B/SYT1/LAMP3/PTPRC/ITPR3/PLAU/TRPM2/SLC2A5/FCGR2A/LHFPL2/LPCAT1/CD109/FCER1G/ITGB2/FCGR3B/FABP5/CYBB/LAIR1/ITGAM/ADGRG3/DMBT1/SELL/CD177 | 27 |
| CC | GO:0009897 | external side of plasma membrane | 31/526 | 426/19518 | 6.12E-07 | 0.000127582 | 0.000112397 | ITGA3/SLAMF7/FCGR2B/PTPRC/LAG3/CD209/NRCAM/IL2RB/BTNL8/FASLG/CSF3R/ULBP2/IL2RA/PDGFRA/SERPINE2/TNFRSF11A/CTSK/IL2RG/FCGR1A/FCER1G/ITGB2/CD3G/CLEC4E/CD3D/ITGAM/EFNA5/TNFRSF18/SELL/PDCD1LG2/FCGR3A/IGHV3-43 | 31 |
| CC | GO:0031528 | microvillus membrane | 7/526 | 30/19518 | 1.18E-05 | 0.001638028 | 0.001443069 | DPEP1/SLC7A8/CA9/SLC6A6/PDPN/S100P/CEACAM20 | 7 |
| CC | GO:0016323 | basolateral plasma membrane | 19/526 | 234/19518 | 2.07E-05 | 0.001807849 | 0.001592678 | CD38/ITGA3/CD44/CA12/CDH17/SLC7A8/VSIG1/CA9/SLCO1B3/SLC2A1/SLC6A6/RHBG/SLC16A3/AQP10/SLC7A7/SLC13A3/MPZ/PDPN/P2RY6 | 19 |
| CC | GO:0030666 | endocytic vesicle membrane | 17/526 | 196/19518 | 2.42E-05 | 0.001807849 | 0.001592678 | SLC11A1/SYT1/AREG/CSF3R/RAB38/EREG/FCGR1A/COLEC12/CD3G/CYBB/CLEC4E/CD3D/ROR2/TLR1/FZD2/DMBT1/HLA-DQA2 | 17 |
| CC | GO:0042581 | specific granule | 15/526 | 160/19518 | 2.92E-05 | 0.001807849 | 0.001592678 | PLAUR/CRISP3/OLFM4/PLAU/TCN1/TRPM2/SLC2A5/ITGB2/CXCL1/CYBB/LAIR1/ITGAM/HPSE/ADGRG3/CD177 | 15 |
| CC | GO:0045178 | basal part of cell | 21/526 | 285/19518 | 3.32E-05 | 0.001807849 | 0.001592678 | CD38/ITGA3/CLDN11/CD44/CA12/CDH17/SLC7A8/VSIG1/SLC1A5/CA9/SLCO1B3/SLC2A1/SLC6A6/RHBG/SLC16A3/AQP10/SLC7A7/SLC13A3/MPZ/PDPN/P2RY6 | 21 |
| CC | GO:0009925 | basal plasma membrane | 20/526 | 266/19518 | 3.83E-05 | 0.001807849 | 0.001592678 | CD38/ITGA3/CD44/CA12/CDH17/SLC7A8/VSIG1/SLC1A5/CA9/SLCO1B3/SLC2A1/SLC6A6/RHBG/SLC16A3/AQP10/SLC7A7/SLC13A3/MPZ/PDPN/P2RY6 | 20 |
| CC | GO:0070820 | tertiary granule | 15/526 | 164/19518 | 3.90E-05 | 0.001807849 | 0.001592678 | PRSS3/SLC11A1/CRISP3/OLFM4/PLAU/TNFAIP6/TCN1/TRPM2/FCER1G/ITGB2/CXCL1/CYBB/LAIR1/ITGAM/CD177 | 15 |
| CC | GO:0060205 | cytoplasmic vesicle lumen | 22/526 | 325/19518 | 7.76E-05 | 0.003219085 | 0.002835948 | HGF/PKM/CRISP3/OLFM4/IMPDH1/CTSC/FASLG/F13A1/TCN1/S100A8/HK3/S100A11/S100A9/MNDA/CXCL1/S100P/FABP5/IGF2/RNASE2/HPSE/PCSK1/PRSS2 | 22 |
| CC | GO:0031983 | vesicle lumen | 22/526 | 327/19518 | 8.49E-05 | 0.003219085 | 0.002835948 | HGF/PKM/CRISP3/OLFM4/IMPDH1/CTSC/FASLG/F13A1/TCN1/S100A8/HK3/S100A11/S100A9/MNDA/CXCL1/S100P/FABP5/IGF2/RNASE2/HPSE/PCSK1/PRSS2 | 22 |
| CC | GO:0030669 | clathrin-coated endocytic vesicle membrane | 9/526 | 73/19518 | 0.000146821 | 0.004709564 | 0.004149029 | SYT1/AREG/EREG/FCGR1A/CD3G/CD3D/ROR2/FZD2/HLA-DQA2 | 9 |
| CC | GO:0070821 | tertiary granule membrane | 9/526 | 73/19518 | 0.000146821 | 0.004709564 | 0.004149029 | SLC11A1/PLAU/TRPM2/FCER1G/ITGB2/CYBB/LAIR1/ITGAM/CD177 | 9 |
| CC | GO:0035579 | specific granule membrane | 10/526 | 91/19518 | 0.000168709 | 0.00502511 | 0.004427019 | PLAUR/PLAU/TRPM2/SLC2A5/ITGB2/CYBB/LAIR1/ITGAM/ADGRG3/CD177 | 10 |
| CC | GO:0034774 | secretory granule lumen | 21/526 | 322/19518 | 0.000188013 | 0.005226765 | 0.004604673 | HGF/PKM/CRISP3/OLFM4/IMPDH1/CTSC/F13A1/TCN1/S100A8/HK3/S100A11/S100A9/MNDA/CXCL1/S100P/FABP5/IGF2/RNASE2/HPSE/PCSK1/PRSS2 | 21 |
| CC | GO:0030665 | clathrin-coated vesicle membrane | 12/526 | 136/19518 | 0.000318003 | 0.00828794 | 0.007301505 | SYT1/AREG/EREG/AP1M2/FCGR1A/DAB2/CD3G/CD3D/ROR2/FZD2/RASSF9/HLA-DQA2 | 12 |
| CC | GO:0005581 | collagen trimer | 9/526 | 85/19518 | 0.000468329 | 0.011487844 | 0.010120554 | COL11A1/LOX/COLEC12/CTHRC1/COL8A2/C1QB/GLDN/EMID1/COL4A5 | 9 |
| CC | GO:0030139 | endocytic vesicle | 21/526 | 347/19518 | 0.00051064 | 0.011829831 | 0.010421838 | SLC11A1/SYT1/AREG/NCF2/CSF3R/RAB38/EREG/FCGR1A/COLEC12/NCF1/CD3G/CYBB/CLEC4E/CD3D/ROR2/TLR1/SPHK1/FZD2/DMBT1/LPAR1/HLA-DQA2 | 21 |
| CC | GO:0000779 | condensed chromosome, centromeric region | 13/526 | 170/19518 | 0.000723204 | 0.015872429 | 0.013983283 | BIRC5/CENPI/NCAPG/TTK/CENPA/KIF18A/CENPE/KIF2C/SKA1/SGO2/PLK1/BUB1/ERCC6L | 13 |
| CC | GO:0045334 | clathrin-coated endocytic vesicle | 9/526 | 92/19518 | 0.000837274 | 0.017457164 | 0.015379402 | SYT1/AREG/EREG/FCGR1A/CD3G/CD3D/ROR2/FZD2/HLA-DQA2 | 9 |
| CC | GO:0005902 | microvillus | 9/526 | 94/19518 | 0.000977791 | 0.018913054 | 0.016662011 | DPEP1/CD44/SLC7A8/CA9/SLC6A6/PDGFRA/PDPN/S100P/CEACAM20 | 9 |
| CC | GO:0005775 | vacuolar lumen | 13/526 | 176/19518 | 0.000997811 | 0.018913054 | 0.016662011 | VCAN/GPC1/IMPDH1/CTSC/CSPG5/FASLG/FMOD/CTSK/MNDA/FABP5/RNASE2/HPSE/PRSS2 | 13 |
| CC | GO:0000793 | condensed chromosome | 17/526 | 270/19518 | 0.001104168 | 0.020019051 | 0.017636372 | BIRC5/CENPI/NCAPG/TTK/CENPA/TEX11/NCAPH/KIF18A/CENPE/KIF2C/MKI67/SKA1/SGO2/PLK1/BUB1/ERCC6L/EID3 | 17 |
| CC | GO:0043020 | NADPH oxidase complex | 4/526 | 18/19518 | 0.00118122 | 0.020523692 | 0.018080951 | NOX1/NCF2/NCF1/CYBB | 4 |
| CC | GO:0062023 | collagen-containing extracellular matrix | 22/526 | 415/19518 | 0.002115078 | 0.034643012 | 0.030519781 | VCAN/COL11A1/GPC1/PKM/APLP1/CTSC/APOA4/LOX/MFAP2/FMOD/F13A1/POSTN/ADAMDEC1/SERPINE2/TINAG/S100A8/S100A9/CTHRC1/COL8A2/C1QB/EFNA5/COL4A5 | 22 |
| CC | GO:0030136 | clathrin-coated vesicle | 14/526 | 215/19518 | 0.002159996 | 0.034643012 | 0.030519781 | RAB27B/SYT1/AREG/EREG/AP1M2/FCHO1/FCGR1A/DAB2/CD3G/CD3D/ROR2/FZD2/RASSF9/HLA-DQA2 | 14 |
| CC | GO:0005796 | Golgi lumen | 9/526 | 106/19518 | 0.002274498 | 0.035128354 | 0.030947357 | VCAN/GPC1/CSPG5/FMOD/MUC15/MUCL1/MUC13/MUC6/MUC5AC | 9 |
| CC | GO:0051233 | spindle midzone | 5/526 | 36/19518 | 0.002636423 | 0.039263866 | 0.034590658 | CDC6/KIF18A/CDCA8/CENPE/PLK1 | 5 |
| CC | GO:0045171 | intercellular bridge | 8/526 | 89/19518 | 0.00275743 | 0.039649936 | 0.034930778 | CDC6/CDC7/OLFM4/CDCA8/TUBB2B/CEP55/CENPE/SKA1 | 8 |
| CC | GO:1904724 | tertiary granule lumen | 6/526 | 55/19518 | 0.003527099 | 0.049026679 | 0.043191496 | PRSS3/CRISP3/OLFM4/TNFAIP6/TCN1/CXCL1 | 6 |
| CC | GO:0044853 | plasma membrane raft | 9/526 | 114/19518 | 0.003719634 | 0.050035079 | 0.044079875 | TREM2/SLC2A1/FASLG/KIF18A/ITGB2/ITGAM/HAS2/EFNA5/CD177 | 9 |
| CC | GO:0000776 | kinetochore | 11/526 | 159/19518 | 0.00394694 | 0.051433567 | 0.045311915 | BIRC5/CENPI/TTK/KIF18A/CENPE/KIF2C/SKA1/SGO2/PLK1/BUB1/ERCC6L | 11 |
| MF | GO:0019864 | IgG binding | 7/507 | 11/18369 | 3.51E-09 | 2.49E-06 | 2.18E-06 | FCGR2B/FCGR2A/FCGR1A/FCER1G/FCGR3B/FCGR3A/FCGR2C | 7 |
| MF | GO:0048018 | receptor ligand activity | 36/507 | 497/18369 | 1.47E-07 | 5.20E-05 | 4.57E-05 | CCL26/HGF/PTHLH/SEMA6A/IL11/OSM/TNFSF13B/CLEC11A/PF4V1/AREG/CALCA/STC2/CSPG5/REG1A/FASLG/SPP1/EREG/IL1B/EPO/NTS/GPNMB/XCL1/CXCL13/NBL1/TFF1/CXCL5/CXCL1/IGF2/CXCL8/SEMA3E/IL17D/CCL13/C1QTNF12/EFNA5/CSF1/LEFTY1 | 36 |
| MF | GO:0005539 | glycosaminoglycan binding | 21/507 | 232/18369 | 1.99E-06 | 0.000470726 | 0.000413617 | CD44/VCAN/COL11A1/PTPRC/TREM2/CCN4/APLP1/PF4V1/REG1A/TNFAIP6/POSTN/REG4/SERPINE2/GPNMB/HAPLN3/SLIT2/CXCL13/LIPH/CXCL8/SELL/SPOCK3 | 21 |
| MF | GO:0019865 | immunoglobulin binding | 7/507 | 24/18369 | 2.69E-06 | 0.000477012 | 0.000419141 | FCGR2B/FCGR2A/FCGR1A/FCER1G/FCGR3B/FCGR3A/FCGR2C | 7 |
| MF | GO:0045236 | CXCR chemokine receptor binding | 6/507 | 18/18369 | 6.01E-06 | 0.000850592 | 0.000747398 | PF4V1/CXCL13/TFF2/CXCL5/CXCL1/CXCL8 | 6 |
| MF | GO:0005125 | cytokine activity | 19/507 | 235/18369 | 3.02E-05 | 0.003566771 | 0.003134049 | CCL26/IL11/OSM/TNFSF13B/PF4V1/AREG/FASLG/SPP1/IL1B/EPO/XCL1/CXCL13/CXCL5/CXCL1/CXCL8/IL17D/CCL13/CSF1/LEFTY1 | 19 |
| MF | GO:0008009 | chemokine activity | 8/507 | 49/18369 | 5.31E-05 | 0.00537093 | 0.004719327 | CCL26/PF4V1/XCL1/CXCL13/CXCL5/CXCL1/CXCL8/CCL13 | 8 |
| MF | GO:0030246 | carbohydrate binding | 20/507 | 273/18369 | 7.59E-05 | 0.00671469 | 0.005900062 | MRC2/CNTN1/VCAN/CD209/CLEC11A/REG1A/EGLN3/REG4/SIGLEC10/SLC2A5/CHODL/COLEC12/HK2/G6PD/HK3/ZG16B/CLEC4E/ITLN1/SELL/CLEC2L | 20 |
| MF | GO:0016175 | superoxide-generating NAD(P)H oxidase activity | 4/507 | 10/18369 | 0.000105511 | 0.008300235 | 0.007293248 | NOX1/NCF2/NCF1/CYBB | 4 |
| MF | GO:0042379 | chemokine receptor binding | 9/507 | 74/18369 | 0.00019455 | 0.013774116 | 0.012103037 | CCL26/PF4V1/XCL1/CXCL13/TFF2/CXCL5/CXCL1/CXCL8/CCL13 | 9 |
| MF | GO:0008201 | heparin binding | 14/507 | 168/18369 | 0.000240795 | 0.015498471 | 0.013618193 | COL11A1/PTPRC/CCN4/APLP1/PF4V1/POSTN/REG4/SERPINE2/GPNMB/SLIT2/CXCL13/LIPH/CXCL8/SELL | 14 |
| MF | GO:0033293 | monocarboxylic acid binding | 9/507 | 80/18369 | 0.000352802 | 0.020064288 | 0.017630083 | CYP26B1/ALOX5AP/CRABP2/S100A8/S100A9/FABP7/FABP5/FABP6/PLA2G1B | 9 |
| MF | GO:0005504 | fatty acid binding | 7/507 | 49/18369 | 0.000368412 | 0.020064288 | 0.017630083 | ALOX5AP/CRABP2/S100A8/S100A9/FABP7/FABP5/FABP6 | 7 |
| MF | GO:0005126 | cytokine receptor binding | 18/507 | 270/18369 | 0.000537024 | 0.027158057 | 0.023863235 | CCL26/IL11/OSM/TNFSF13B/PF4V1/FASLG/IL1B/EPO/XCL1/CXCL13/TFF2/CXCL5/CXCL1/CXCL8/CCL13/EFNA5/CSF1/LEFTY1 | 18 |
| MF | GO:0030297 | transmembrane receptor protein tyrosine kinase activator activity | 4/507 | 16/18369 | 0.00080144 | 0.035463733 | 0.031161264 | AREG/EREG/IGF2/EFNA5 | 4 |
| MF | GO:0050664 | oxidoreductase activity, acting on NAD(P)H, oxygen as acceptor | 4/507 | 16/18369 | 0.00080144 | 0.035463733 | 0.031161264 | NOX1/NCF2/NCF1/CYBB | 4 |
| MF | GO:0019955 | cytokine binding | 11/507 | 130/18369 | 0.000962215 | 0.040073418 | 0.035211701 | IL2RB/CHRDL1/CSF3R/IL2RA/TNFRSF11A/IL2RG/CD109/NBL1/PDPN/IL20RB/TRIM16 | 11 |
| MF | GO:0051861 | glycolipid binding | 5/507 | 29/18369 | 0.001077764 | 0.04239204 | 0.037249027 | DPEP1/TREM2/FCGR3B/CLEC4E/SELL | 5 |
| MF | GO:0008017 | microtubule binding | 17/507 | 268/18369 | 0.001309686 | 0.048265461 | 0.042409883 | KIF3C/BIRC5/KIF4A/DNM1/KIF18A/DLGAP5/KIF23/TRIM54/CENPE/GAS2L3/KIF2C/S100A8/SKA1/S100A9/KIF15/PLK1/MX2 | 17 |
| MF | GO:0031406 | carboxylic acid binding | 14/507 | 200/18369 | 0.001363431 | 0.048265461 | 0.042409883 | CYP26B1/COL11A1/GLRB/EGLN3/ALOX5AP/SIGLEC10/CRABP2/S100A8/S100A9/FABP7/FABP5/FABP6/PLA2G1B/SELL | 14 |
| MF | GO:0030506 | ankyrin binding | 4/507 | 19/18369 | 0.001598329 | 0.053886514 | 0.047348988 | PTPRC/NRCAM/FLNC/RHBG | 4 |

Tab. S7 Enriched GO terms for differentially expressed genes.

| ID | Description | GeneRatio | BgRatio | pvalue | p.adjust | qvalue | geneID | Count |
| --- | --- | --- | --- | --- | --- | --- | --- | --- |
| hsa04640 | Hematopoietic cell lineage | 14/270 | 99/8663 | 2.06E-06 | 0.00033259 | 0.000302187 | CD38/ITGA3/CD44/IL11/CSF3R/IL1B/EPO/IL2RA/FCGR1A/CD3G/CD3D/ITGAM/CSF1/HLA-DQA2 | 14 |
| hsa05140 | Leishmaniasis | 12/270 | 77/8663 | 3.97E-06 | 0.00033259 | 0.000302187 | NCF2/IL1B/FCGR2A/FCGR1A/NCF1/ITGB2/FCGR3B/CYBB/ITGAM/FCGR3A/HLA-DQA2/FCGR2C | 12 |
| hsa04380 | Osteoclast differentiation | 16/270 | 135/8663 | 4.19E-06 | 0.00033259 | 0.000302187 | NOX1/FCGR2B/TREM2/ITPR3/NCF2/IL1B/TNFRSF11A/FCGR2A/CTSK/FCGR1A/NCF1/FCGR3B/CSF1/LILRB4/FCGR3A/FCGR2C | 16 |
| hsa04145 | Phagosome | 17/270 | 152/8663 | 4.67E-06 | 0.00033259 | 0.000302187 | MRC2/FCGR2B/CD209/NCF2/TUBB2B/FCGR2A/FCGR1A/COLEC12/NCF1/ITGB2/FCGR3B/CYBB/ITGAM/TUBA3C/FCGR3A/HLA-DQA2/FCGR2C | 17 |
| hsa04061 | Viral protein interaction with cytokine and cytokine receptor | 13/270 | 100/8663 | 1.24E-05 | 0.000704304 | 0.000639921 | CCL26/IL2RB/PF4V1/IL2RA/XCL1/IL2RG/CXCL13/CXCL5/CXCL1/CXCL8/IL20RB/CCL13/CSF1 | 13 |
| hsa04060 | Cytokine-cytokine receptor interaction | 23/270 | 297/8663 | 5.04E-05 | 0.002392842 | 0.002174105 | CCL26/IL11/OSM/IL2RB/TNFSF13B/PF4V1/FASLG/CSF3R/IL1B/EPO/IL2RA/TNFRSF11A/XCL1/IL2RG/CXCL13/CXCL5/CXCL1/CXCL8/IL17D/IL20RB/CCL13/CSF1/TNFRSF18 | 23 |
| hsa05323 | Rheumatoid arthritis | 11/270 | 93/8663 | 0.000138879 | 0.005375968 | 0.004884536 | IL11/TNFSF13B/IL1B/TNFRSF11A/CTSK/ITGB2/CXCL5/CXCL1/CXCL8/CSF1/HLA-DQA2 | 11 |
| hsa05152 | Tuberculosis | 16/270 | 180/8663 | 0.000150904 | 0.005375968 | 0.004884536 | MRC2/FCGR2B/CD209/IL1B/FCGR2A/FCGR1A/FCER1G/ITGB2/FCGR3B/CLEC4E/ITGAM/TLR1/SPHK1/FCGR3A/HLA-DQA2/FCGR2C | 16 |
| hsa05150 | Staphylococcus aureus infection | 11/270 | 96/8663 | 0.000184981 | 0.005857734 | 0.005322262 | FCGR2B/FCGR2A/FCGR1A/ITGB2/FCGR3B/ITGAM/KRT20/C1QB/FCGR3A/HLA-DQA2/FCGR2C | 11 |
| hsa04514 | Cell adhesion molecules | 14/270 | 157/8663 | 0.00037671 | 0.010281518 | 0.009341656 | CLDN11/CNTN1/VCAN/PTPRC/NRCAM/CNTNAP1/NLGN4X/MPZ/ITGB2/ITGAM/TIGIT/SELL/PDCD1LG2/HLA-DQA2 | 14 |
| hsa00052 | Galactose metabolism | 6/270 | 32/8663 | 0.000396831 | 0.010281518 | 0.009341656 | AKR1B1/HK2/HK3/AKR1B10/AKR1B15/MGAM2 | 6 |
| hsa00051 | Fructose and mannose metabolism | 6/270 | 34/8663 | 0.000558957 | 0.013275227 | 0.012061702 | AKR1B1/PFKFB4/HK2/HK3/AKR1B10/AKR1B15 | 6 |
| hsa04974 | Protein digestion and absorption | 10/270 | 103/8663 | 0.001344691 | 0.028912159 | 0.026269219 | PRSS3/COL11A1/SLC7A8/SLC1A5/MEP1A/SLC7A7/CPA2/COL8A2/COL4A5/PRSS2 | 10 |
| hsa05230 | Central carbon metabolism in cancer | 8/270 | 70/8663 | 0.001420246 | 0.028912159 | 0.026269219 | PKM/SLC1A5/SLC2A1/PDGFRA/SLC16A3/HK2/G6PD/HK3 | 8 |
| hsa04151 | PI3K-Akt signaling pathway | 22/270 | 359/8663 | 0.001850933 | 0.035167728 | 0.031952949 | ITGA3/HGF/OSM/IL2RB/CCNE1/PIK3CG/AREG/FASLG/SPP1/CSF3R/EREG/EPO/IL2RA/PDGFRA/IL2RG/CREB3L1/IGF2/EFNA5/CSF1/LPAR5/COL4A5/LPAR1 | 22 |
| hsa00591 | Linoleic acid metabolism | 5/270 | 30/8663 | 0.002130302 | 0.037946005 | 0.034477256 | PLA2G4A/CYP2C9/CYP3A4/PLA2G1B/PLA2G2A | 5 |
| hsa04666 | Fc gamma R-mediated phagocytosis | 9/270 | 97/8663 | 0.003162763 | 0.053022787 | 0.048175828 | FCGR2B/PTPRC/PLA2G4A/FCGR2A/FCGR1A/NCF1/FCGR3B/SPHK1/FCGR3A | 9 |

Tab. S8 Enriched KEGG pathways for differentially expressed genes.

| ID | Description | setSize | enrichmentScore | NES | pvalue | p.adjust | qvalue | rank | leading_edge | core_enrichment |
| --- | --- | --- | --- | --- | --- | --- | --- | --- | --- | --- |
| KEGG_FATTY_ACID_METABOLISM | KEGG_FATTY_ACID_METABOLISM | 40 | -0.770211798 | -2.963946511 | 1.00E-10 | 8.55E-09 | 7.05E-09 | 2513 | tags=72%, list=13%, signal=63% | ALDH3A2/ALDH7A1/ACADM/ACSL1/GCDH/ACADS/ACADVL/ACAT1/ACOX1/ACAA2/ECHS1/ECI1/ECI2/ACADL/ALDH1B1/ACADSB/EHHADH/ACAA1/ALDH2/ADH1C/ACSL5/CPT1A/ADH6/CYP4A11/ADH1A/CYP4A22/ADH4/ADH1B/ACSL6 |
| KEGG_CYTOKINE_CYTOKINE_RECEPTOR_INTERACTION | KEGG_CYTOKINE_CYTOKINE_RECEPTOR_INTERACTION | 187 | 0.610798994 | 1.845326541 | 1.00E-10 | 8.55E-09 | 7.05E-09 | 3521 | tags=49%, list=19%, signal=40% | IL11/CXCL5/EGF/PF4V1/EPO/CCL26/CXCL1/HGF/CD70/CCL13/CXCL13/CSF3R/TNFRSF11A/IL21R/IL2RA/BMP7/IL2RG/CXCL8/TNFRSF17/IFNG/XCL1/CSF1/TNFSF13B/TNFRSF18/IL2RB/PDGFRA/FASLG/OSM/IL20RB/CCL19/IL1B/TNFRSF9/CSF2RB/CD27/CCR1/CCR5/RELT/CCL21/EDA/IL12RB1/IL18/LTA/CSF1R/XCL2/CCL8/OSMR/CXCL6/CXCL3/CSF2RA/CXCR3/CCL5/CXCL9/CX3CR1/CCR4/IL6/CXCR6/CCL22/TNFRSF13C/IL15/CXCL14/TNFSF9/CXCL11/CCR2/CCR7/KITLG/PLEKHO2/TNFRSF11B/CCL20/CCL11/CCL4/TGFB3/VEGFB/IL10RA/CCL4L2/TNFSF8/PF4/IL1R2/TGFB1/CCL3L3/CCL28/CXCL10/CD40/CCL17/CCL18/LTB/BMP2/TNFRSF1B/IL15RA/CD40LG/CCL3/IL7R |
| KEGG_DRUG_METABOLISM_CYTOCHROME_P450 | KEGG_DRUG_METABOLISM_CYTOCHROME_P450 | 63 | -0.526803671 | -2.288023041 | 7.04E-07 | 4.01E-05 | 3.31E-05 | 2061 | tags=60%, list=11%, signal=54% | GSTZ1/UGT2B7/CYP2C18/GSTM2/GSTO2/MAOB/GSTO1/UGT1A4/UGT2B15/GSTM1/ALDH1A3/FMO4/MGST2/CYP2A6/UGT2B10/FMO5/ADH1C/AOX1/CYP2D6/ADH6/UGT1A3/GSTM5/CYP1A2/FMO3/CYP3A5/ADH1A/ADH4/ADH1B/CYP3A7/CYP2C8/CYP2B6/CYP2E1/CYP2A7/CYP3A43/CYP2C9/CYP2A13/CYP3A4/ALDH3B2 |
| KEGG_HEMATOPOIETIC_CELL_LINEAGE | KEGG_HEMATOPOIETIC_CELL_LINEAGE | 65 | 0.672976551 | 1.931329872 | 3.06E-06 | 0.000104597 | 8.63E-05 | 3593 | tags=58%, list=19%, signal=47% | IL11/CR2/EPO/FCGR1A/CD1A/MS4A1/CSF3R/IL2RA/CD38/ITGAM/ITGA3/CD3G/CD22/CSF1/CD44/CD3D/IL1B/CD19/CD8A/CD8B/CSF1R/CSF2RA/IL6/CD2/ITGA4/CD37/CD3E/CD33/KITLG/CD5/IL1R2/GP1BA/HLA-DRA/TFRC/ITGB3/IL7R/ITGA5/CD4 |
| KEGG_NEUROACTIVE_LIGAND_RECEPTOR_INTERACTION | KEGG_NEUROACTIVE_LIGAND_RECEPTOR_INTERACTION | 126 | 0.573540393 | 1.709583452 | 2.47E-06 | 0.000104597 | 8.63E-05 | 2529 | tags=35%, list=14%, signal=30% | PRSS1/PRSS2/GPR50/CHRNA1/TACR1/GABRA3/CNR1/NPFFR2/LPAR3/CGA/HRH2/P2RY6/GRM8/GHRHR/LPAR1/BDKRB1/ADORA3/PRSS3/HRH1/GLRB/GIPR/ADRA2A/P2RY10/PTGFR/SSTR2/PTGER4/CHRM3/F2RL2/C3AR1/FPR1/PTGER2/FPR3/PTAFR/P2RY13/ADORA2B/F2RL1/KISS1R/NPY1R/GZMA/MTNR1B/GRIA3/MCHR1/GABRB3/GRIN2D |
| KEGG_CELL_ADHESION_MOLECULES_CAMS | KEGG_CELL_ADHESION_MOLECULES_CAMS | 113 | 0.568905522 | 1.682618687 | 2.35E-05 | 0.000669228 | 0.000552025 | 3964 | tags=48%, list=21%, signal=38% | CNTN1/CLDN6/VCAN/PDCD1LG2/MPZ/NRCAM/CLDN18/CNTNAP1/CLDN11/ITGAM/CD22/NCAM2/ICOS/SELL/HLA-DQA2/NLGN4X/PTPRC/ITGB2/CD8A/CD274/CTLA4/CD86/PDCD1/CD8B/HLA-DQA1/ICAM1/SPN/HLA-DOA/HLA-DQB1/CLDN4/SDC3/CD2/SELPLG/ITGA4/HLA-DOB/SIGLEC1/HLA-DMB/ITGAV/CLDN19/CD6/HLA-DRA/ITGAL/HLA-DPA1/NCAM1/HLA-DPB1/CD40/CD28/NLGN2/CD40LG/CD4/HLA-DRB1/MPZL1/ITGB8/ITGB7 |
| KEGG_INTESTINAL_IMMUNE_NETWORK_FOR_IGA_PRODUCTION | KEGG_INTESTINAL_IMMUNE_NETWORK_FOR_IGA_PRODUCTION | 35 | 0.741145037 | 1.961593739 | 2.97E-05 | 0.000725439 | 0.000598393 | 4309 | tags=86%, list=23%, signal=66% | TNFRSF17/TNFSF13B/ICOS/HLA-DQA2/CD86/HLA-DQA1/HLA-DOA/HLA-DQB1/PIGR/IL6/ITGA4/TNFRSF13C/IL15/HLA-DOB/HLA-DMB/MAP3K14/TGFB1/HLA-DRA/CCL28/HLA-DPA1/HLA-DPB1/CD40/CD28/IL15RA/CD40LG/TNFSF13/CXCR4/HLA-DRB1/ITGB7/HLA-DMA |
| KEGG_RETINOL_METABOLISM | KEGG_RETINOL_METABOLISM | 55 | -0.49811005 | -2.132801945 | 4.16E-05 | 0.000888254 | 0.000732693 | 1111 | tags=44%, list=6%, signal=41% | CYP2A6/RDH16/UGT2B10/RDH5/ADH1C/CYP1A1/ADH6/UGT1A3/CYP1A2/CYP3A5/CYP4A11/ADH1A/CYP4A22/ADH4/ADH1B/CYP3A7/CYP2C8/CYP2B6/CYP2A7/CYP3A43/CYP2C9/CYP2A13/CYP26A1/CYP3A4 |
| KEGG_PRIMARY_BILE_ACID_BIOSYNTHESIS | KEGG_PRIMARY_BILE_ACID_BIOSYNTHESIS | 15 | -0.77240653 | -2.616437835 | 8.56E-05 | 0.00162699 | 0.001342054 | 1926 | tags=87%, list=10%, signal=78% | CYP7A1/ACOX2/HSD17B4/SCP2/AKR1C4/CYP39A1/CYP7B1/BAAT/CYP27A1/AKR1D1/AMACR/SLC27A5/CYP8B1 |
| KEGG_LEISHMANIA_INFECTION | KEGG_LEISHMANIA_INFECTION | 64 | 0.60683882 | 1.735792887 | 0.000257281 | 0.004399502 | 0.003629014 | 4375 | tags=55%, list=23%, signal=42% | FCGR3B/FCGR1A/FCGR2C/NCF1/FCGR3A/IFNG/ITGAM/FCGR2A/NCF2/HLA-DQA2/IL1B/ITGB2/PRKCB/TLR2/HLA-DQA1/HLA-DOA/NCF4/HLA-DQB1/ITGA4/HLA-DOB/HLA-DMB/TGFB3/MARCKSL1/MAPK12/TGFB1/HLA-DRA/JAK2/HLA-DPA1/HLA-DPB1/CYBA/IRAK1/HLA-DRB1/HLA-DMA/TLR4/TNF |
| KEGG_CELL_CYCLE | KEGG_CELL_CYCLE | 119 | 0.515161973 | 1.529982159 | 0.000768604 | 0.011823299 | 0.009752675 | 4124 | tags=46%, list=22%, signal=36% | SMC1B/CCNE1/CDC20/ORC1/SFN/E2F2/PLK1/BUB1/CDC6/TTK/CDC25A/CDC7/PTTG1/CCNB1/BUB1B/CDKN2A/ORC6/CDC25B/MCM2/CDC45/CHEK1/CDK1/CCNB2/RBL1/MAD2L1/MCM6/MCM7/CDC25C/E2F1/PKMYT1/CCNE2/CDKN2B/CDKN1C/MCM4/DBF4/CDKN2C/MCM3/TGFB3/CDC14A/TGFB1/E2F3/ESPL1/MAD2L2/CDK4/CDK2/PCNA/TFDP1/E2F5/YWHAZ/MCM5/HDAC1/CDKN2D/PRKDC/HDAC2/SMC1A |
| KEGG_CHEMOKINE_SIGNALING_PATHWAY | KEGG_CHEMOKINE_SIGNALING_PATHWAY | 162 | 0.495336571 | 1.49022811 | 0.000829705 | 0.011823299 | 0.009752675 | 4118 | tags=43%, list=22%, signal=34% | CXCL5/PF4V1/CCL26/CXCL1/CCL13/CXCL13/PIK3CG/NCF1/CXCL8/XCL1/CCL19/HCK/PRKCB/PIK3CD/CCR1/CCR5/CCL21/DOCK2/JAK3/XCL2/CCL8/FGR/CXCL6/CXCL3/CXCR3/RAC2/CCL5/VAV1/CXCL9/CX3CR1/CCR4/GNB4/CXCR6/PLCB1/CCL22/CXCL14/CXCL11/CCR2/ADCY7/CCR7/CCL20/CCL11/CCL4/CCL4L2/AKT3/PRKCD/PF4/ITK/PIK3R5/CCL3L3/ADCY3/JAK2/CCL28/GNGT2/CXCL10/WAS/PLCB2/CCL17/CCL18/PRKACB/GNG2/CCL3/NRAS/ELMO1/PREX1/CXCR4/GNG4/HRAS/GRK6/LYN |
| KEGG_AUTOIMMUNE_THYROID_DISEASE | KEGG_AUTOIMMUNE_THYROID_DISEASE | 28 | 0.690703008 | 1.773158237 | 0.001034657 | 0.013609725 | 0.011226243 | 4309 | tags=71%, list=23%, signal=55% | CGA/GZMB/FASLG/HLA-DQA2/CTLA4/CD86/HLA-DQA1/HLA-DOA/HLA-DQB1/PRF1/HLA-DOB/HLA-DMB/HLA-DRA/HLA-DPA1/HLA-DPB1/CD40/CD28/CD40LG/HLA-DRB1/HLA-DMA |
| KEGG_PROXIMAL_TUBULE_BICARBONATE_RECLAMATION | KEGG_PROXIMAL_TUBULE_BICARBONATE_RECLAMATION | 20 | -0.608042496 | -2.215212909 | 0.001262409 | 0.014940369 | 0.01232385 | 1410 | tags=55%, list=8%, signal=51% | PCK1/ATP1B2/SLC38A3/GLS2/PCK2/SLC9A3/CA2/GLUD1/AQP1/CA4/ATP1A2 |
| KEGG_GRAFT_VERSUS_HOST_DISEASE | KEGG_GRAFT_VERSUS_HOST_DISEASE | 28 | 0.685279692 | 1.759235615 | 0.001310559 | 0.014940369 | 0.01232385 | 4375 | tags=71%, list=23%, signal=55% | IFNG/GZMB/FASLG/HLA-DQA2/IL1B/CD86/HLA-DQA1/HLA-DOA/HLA-DQB1/PRF1/IL6/HLA-DOB/HLA-DMB/HLA-DRA/HLA-DPA1/HLA-DPB1/CD28/HLA-DRB1/HLA-DMA/TNF |
| KEGG_PRIMARY_IMMUNODEFICIENCY | KEGG_PRIMARY_IMMUNODEFICIENCY | 29 | 0.687029709 | 1.775982554 | 0.00140011 | 0.014963681 | 0.012343079 | 5633 | tags=93%, list=30%, signal=65% | IL2RG/CD79A/ICOS/CD3D/PTPRC/CD19/CD8A/CD8B/JAK3/BTK/ADA/LCK/CD3E/TNFRSF13C/CIITA/CD40/CD40LG/IL7R/CD4/RFX5/TAP1/ZAP70/IKBKG/RFXAP/DCLRE1C/TAP2/RFXANK |
| KEGG_ALLOGRAFT_REJECTION | KEGG_ALLOGRAFT_REJECTION | 28 | 0.682027389 | 1.750886369 | 0.001547046 | 0.015561466 | 0.012836174 | 4375 | tags=71%, list=23%, signal=55% | IFNG/GZMB/FASLG/HLA-DQA2/CD86/HLA-DQA1/HLA-DOA/HLA-DQB1/PRF1/HLA-DOB/HLA-DMB/HLA-DRA/HLA-DPA1/HLA-DPB1/CD40/CD28/CD40LG/HLA-DRB1/HLA-DMA/TNF |
| KEGG_PEROXISOME | KEGG_PEROXISOME | 77 | -0.355753258 | -1.682266221 | 0.002227238 | 0.021158757 | 0.017453207 | 1908 | tags=31%, list=10%, signal=28% | NOS2/MLYCD/ACOX2/HSD17B4/ACOX1/SCP2/PECR/AGXT/ECI2/SLC27A2/PEX11A/PIPOX/PHYH/CAT/DAO/PEX11G/EHHADH/ACAA1/ACSL5/BAAT/EPHX2/HAO1/AMACR/ACSL6 |
| KEGG_METABOLISM_OF_XENOBIOTICS_BY_CYTOCHROME_P450 | KEGG_METABOLISM_OF_XENOBIOTICS_BY_CYTOCHROME_P450 | 60 | -0.411376141 | -1.760125613 | 0.002705611 | 0.0243505 | 0.020085977 | 2061 | tags=53%, list=11%, signal=48% | GSTZ1/UGT2B7/CYP2C18/GSTM2/GSTO2/GSTO1/UGT1A4/AKR1C4/UGT2B15/GSTM1/EPHX1/ALDH1A3/MGST2/UGT2B10/ADH1C/CYP1A1/ADH6/UGT1A3/GSTM5/CYP1A2/CYP3A5/ADH1A/ADH4/ADH1B/CYP3A7/CYP2C8/CYP2B6/CYP2E1/CYP3A43/CYP2C9/CYP3A4/ALDH3B2 |
| KEGG_ASTHMA | KEGG_ASTHMA | 18 | 0.706733234 | 1.711451446 | 0.004688595 | 0.040087483 | 0.03306693 | 4375 | tags=89%, list=23%, signal=68% | FCER1G/HLA-DQA2/HLA-DQA1/HLA-DOA/HLA-DQB1/HLA-DOB/HLA-DMB/CCL11/HLA-DRA/HLA-DPA1/HLA-DPB1/CD40/CD40LG/HLA-DRB1/HLA-DMA/TNF |
| KEGG_SYSTEMIC_LUPUS_ERYTHEMATOSUS | KEGG_SYSTEMIC_LUPUS_ERYTHEMATOSUS | 85 | 0.519139827 | 1.518305705 | 0.005440149 | 0.044298354 | 0.036540348 | 4375 | tags=41%, list=23%, signal=32% | FCGR3B/FCGR2B/FCGR1A/FCGR2C/FCGR3A/IFNG/FCGR2A/HLA-DQA2/C1QB/C1QC/CD86/C1QA/HLA-DQA1/HLA-DOA/HLA-DQB1/H3C3/HLA-DOB/H2AZ1/HLA-DMB/HLA-DRA/HLA-DPA1/H2AX/HLA-DPB1/CD40/CD28/H4C4/CD40LG/H3C2/HLA-DRB1/SNRPD1/MACROH2A1/H4C3/SNRPB/HLA-DMA/TNF |
| KEGG_TYPE_I_DIABETES_MELLITUS | KEGG_TYPE_I_DIABETES_MELLITUS | 32 | 0.632384327 | 1.65526175 | 0.006556344 | 0.050960674 | 0.04203589 | 4375 | tags=66%, list=23%, signal=50% | IFNG/GZMB/FASLG/HLA-DQA2/IL1B/CD86/LTA/HLA-DQA1/HLA-DOA/HLA-DQB1/PRF1/CPE/HLA-DOB/HLA-DMB/HLA-DRA/HLA-DPA1/HLA-DPB1/CD28/HLA-DRB1/HLA-DMA/TNF |
| KEGG_GLYCINE_SERINE_AND_THREONINE_METABOLISM | KEGG_GLYCINE_SERINE_AND_THREONINE_METABOLISM | 29 | -0.510225088 | -1.943943974 | 0.009543802 | 0.066646911 | 0.054974983 | 2292 | tags=55%, list=12%, signal=48% | GLYCTK/BHMT/CHDH/SDS/GCAT/MAOB/AGXT/GATM/PIPOX/CBS/GAMT/DAO/SARDH/DMGDH/GNMT/ALAS1 |
| KEGG_ETHER_LIPID_METABOLISM | KEGG_ETHER_LIPID_METABOLISM | 25 | 0.648623214 | 1.642288367 | 0.009069608 | 0.066646911 | 0.054974983 | 2086 | tags=36%, list=11%, signal=32% | ENPP6/PLA2G2D/PLA2G1B/PLA2G4A/PLA2G2A/LPCAT1/PAFAH1B3/PLA2G7/LPCAT4 |
| KEGG_NOD_LIKE_RECEPTOR_SIGNALING_PATHWAY | KEGG_NOD_LIKE_RECEPTOR_SIGNALING_PATHWAY | 56 | 0.550777342 | 1.549811378 | 0.0097437 | 0.066646911 | 0.054974983 | 2718 | tags=36%, list=15%, signal=31% | PYDC1/CXCL1/CCL13/CXCL8/CARD6/IL1B/IL18/PYCARD/CCL8/BIRC3/NOD2/CCL5/CASP1/IL6/NLRP3/CCL11/PSTPIP1/MAPK12/NLRC4/CARD9 |
| KEGG_FC_GAMMA_R_MEDIATED_PHAGOCYTOSIS | KEGG_FC_GAMMA_R_MEDIATED_PHAGOCYTOSIS | 84 | 0.499648272 | 1.458540053 | 0.011269731 | 0.074120157 | 0.061139434 | 5870 | tags=52%, list=31%, signal=36% | FCGR2B/FCGR1A/PIK3CG/FCGR2C/NCF1/FCGR3A/PLA2G4A/DNM1/FCGR2A/SPHK1/PTPRC/HCK/SYK/PRKCB/LIMK1/PIK3CD/DOCK2/RAC2/VAV1/MARCKS/MARCKSL1/AKT3/PRKCD/PIK3R5/INPP5D/WAS/ASAP1/VASP/WASF1/ASAP3/WASF2/PLPP2/LIMK2/LYN/CDC42/ARPC2/CFL1/ASAP2/ARPC4/ARPC5L/MAPK3/PIK3CB/ARPC1A/RAC1 |
| KEGG_DNA_REPLICATION | KEGG_DNA_REPLICATION | 34 | 0.576417831 | 1.520045875 | 0.014740011 | 0.09001935 | 0.074254189 | 5556 | tags=74%, list=30%, signal=52% | MCM2/MCM6/MCM7/RFC4/MCM4/POLA2/MCM3/POLE4/POLA1/FEN1/POLD1/PRIM1/PCNA/RFC2/PRIM2/MCM5/RPA2/POLD3/RFC5/POLE2/RPA3/DNA2/POLE3/RPA1/LIG1 |
| KEGG_TOLL_LIKE_RECEPTOR_SIGNALING_PATHWAY | KEGG_TOLL_LIKE_RECEPTOR_SIGNALING_PATHWAY | 81 | 0.496247346 | 1.447882914 | 0.014266272 | 0.09001935 | 0.074254189 | 4532 | tags=41%, list=24%, signal=31% | CTSK/PIK3CG/TLR7/TLR8/CXCL8/TLR6/SPP1/IL1B/TLR1/PIK3CD/CD86/LY96/TLR2/IKBKE/CCL5/CXCL9/IL6/CXCL11/CCL4/AKT3/PIK3R5/MAPK12/LBP/CXCL10/CD40/CCL3/TRAF3/IRAK1/CASP8/TLR4/TNF/TLR5/TLR3 |
| KEGG_NATURAL_KILLER_CELL_MEDIATED_CYTOTOXICITY | KEGG_NATURAL_KILLER_CELL_MEDIATED_CYTOTOXICITY | 93 | 0.47828391 | 1.40685431 | 0.015610688 | 0.092049226 | 0.075928571 | 3235 | tags=31%, list=17%, signal=26% | FCGR3B/CHP2/ULBP2/PIK3CG/FCER1G/FCGR3A/IFNG/GZMB/FASLG/ITGB2/SYK/PRKCB/PIK3CD/MICB/ULBP3/TYROBP/ICAM1/RAC2/SH2D1A/VAV1/PRF1/LCK/CD48/LCP2/PIK3R5/CD247/ITGAL/HCST/NFATC4 |
| KEGG_RENIN_ANGIOTENSIN_SYSTEM | KEGG_RENIN_ANGIOTENSIN_SYSTEM | 15 | -0.566259257 | -1.918137777 | 0.024639108 | 0.140442914 | 0.115847033 | 1910 | tags=40%, list=10%, signal=36% | THOP1/MME/CTSG/CMA1/ACE2/REN |
| KEGG_JAK_STAT_SIGNALING_PATHWAY | KEGG_JAK_STAT_SIGNALING_PATHWAY | 102 | 0.466204117 | 1.37418096 | 0.026193222 | 0.144485194 | 0.119181385 | 2868 | tags=25%, list=15%, signal=21% | IL11/IL13RA2/EPO/CSF3R/IL21R/IL2RA/IL2RG/PIK3CG/IFNG/IL2RB/OSM/IL20RB/CSF2RB/PIK3CD/IL12RB1/JAK3/OSMR/SPRED1/CSF2RA/IL6/IL15/IL10RA/AKT3/PIK3R5/JAK2 |
| KEGG_BETA_ALANINE_METABOLISM | KEGG_BETA_ALANINE_METABOLISM | 20 | -0.457647691 | -1.667296412 | 0.027256318 | 0.145650949 | 0.12014298 | 2516 | tags=60%, list=13%, signal=52% | HIBCH/ALDH3A2/ALDH7A1/ACADM/MLYCD/ABAT/ECHS1/ALDH1B1/EHHADH/ALDH2/DPYS/UPB1 |
| KEGG_LINOLEIC_ACID_METABOLISM | KEGG_LINOLEIC_ACID_METABOLISM | 20 | -0.447850333 | -1.631602801 | 0.032249752 | 0.157563076 | 0.129968927 | 448 | tags=65%, list=2%, signal=64% | CYP2C18/PLA2G5/PLA2G6/CYP2J2/PLA2G12B/CYP1A2/CYP3A5/CYP3A7/CYP2C8/CYP2E1/CYP3A43/CYP2C9/CYP3A4 |
| KEGG_TYROSINE_METABOLISM | KEGG_TYROSINE_METABOLISM | 36 | -0.391276889 | -1.491302465 | 0.031845972 | 0.157563076 | 0.129968927 | 1326 | tags=42%, list=7%, signal=39% | MAOB/GOT1/DBH/ALDH1A3/GOT2/HPD/ADH1C/AOX1/COMT/ADH6/TAT/ADH1A/ADH4/ADH1B/ALDH3B2 |
| KEGG_B_CELL_RECEPTOR_SIGNALING_PATHWAY | KEGG_B_CELL_RECEPTOR_SIGNALING_PATHWAY | 73 | 0.492182207 | 1.420809545 | 0.031472081 | 0.157563076 | 0.129968927 | 4118 | tags=37%, list=22%, signal=29% | CR2/CHP2/FCGR2B/PIK3CG/CD79A/CD22/SYK/CD19/PRKCB/PIK3CD/DAPP1/BTK/RAC2/VAV1/CARD11/LILRB3/AKT3/CD79B/PIK3R5/NFKBIE/CD72/INPP5D/NFATC4/BCL10/NRAS/HRAS/LYN |
| KEGG_PATHOGENIC_ESCHERICHIA_COLI_INFECTION | KEGG_PATHOGENIC_ESCHERICHIA_COLI_INFECTION | 48 | 0.51198381 | 1.419466029 | 0.042311662 | 0.200980392 | 0.165782533 | 6446 | tags=65%, list=35%, signal=42% | TUBA3C/TUBB2B/LY96/TUBA1C/TUBA4A/ARHGEF2/TUBA1B/TUBA1A/TUBB6/TUBB4A/HCLS1/WAS/NCK2/YWHAZ/EZR/TUBB4B/TLR4/CDC42/TLR5/ARPC2/TUBB2A/TUBB/YWHAQ/ARPC4/ACTB/ARPC5L/ARPC1A/RHOA/ARPC3/ABL1/NCL |
| KEGG_ECM_RECEPTOR_INTERACTION | KEGG_ECM_RECEPTOR_INTERACTION | 73 | 0.479167881 | 1.383240371 | 0.045685279 | 0.211140074 | 0.174162942 | 4031 | tags=41%, list=22%, signal=32% | COL11A1/TNC/SV2A/ITGA3/CD44/SPP1/COL6A3/COL3A1/HMMR/COL1A2/SDC3/ITGA4/LAMB3/ITGAV/COL1A1/LAMB1/COL6A2/GP1BA/COL5A2/COL4A4/LAMA1/ITGB3/ITGA5/COL5A1/CD47/COL6A1/LAMA4/ITGB8/ITGB7/AGRN |

Tab. S9 Enrichment results of Gene Set Enrichment Analysis (GSEA) for differentially expressed genes.
